# Supplementary material for: Ru(ii)-catalysed oxidative (4 + 2) annulation of chromene and coumarin carboxylic acids with alkynes/propargylic alcohols: isolation of Ru(0) complexes
Source: Royal Society of Chemistry journal article supplement (doi:10.1039/d2ob01890j), 2022-12-09

found 809.5203.

### 3-15-2. Using 1,2-di-*O*-palmitoyl-*sn*-glycerol-3-phosphate sodium salt.

1,2-di-*O*-palmitoyl-*sn*-glycerol-3-phosphate sodium salt (**13**, 1 mg, 1.2  $\mu\text{mol}$ ), D-glucose (0.65 mg, 3.6  $\mu\text{mol}$ ) and TEA (6  $\mu\text{L}$ , 43 mmol) were suspended in propionitrile/H<sub>2</sub>O (1/5, 18  $\mu\text{L}$ ), treated with DMC (1.8 mg, 11  $\mu\text{mol}$ ) at 0 °C and stirred at 4 °C for 1 h. The mixture was applied to silica gel column chromatography (Iatrobeads 6RS-8060 No.1104) and eluted with CHCl<sub>3</sub>/MeOH/TEA (100/0/1 to 89/11/0.2, 80/20/0.2, *v/v*). All fractions containing **14** were collected and concentrated *in vacuo*. The residue was purified by gel permeation column chromatography (Sephadex LH20) with CHCl<sub>3</sub>/MeOH/TEA (50/50/1, *v/v*) to give **14** (0.28 mg, 20%).

### 3-16. Synthesis of <sup>13</sup>C-labeled phosphatidyl glucoside (U-<sup>13</sup>C<sub>6</sub>): **15**

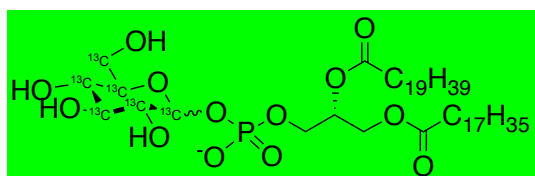

A mixture of PA(18:0/20:0) **3** (5.0 mg, 6  $\mu\text{mol}$ ), <sup>13</sup>C<sub>6</sub>-D-glucose (3.3 mg, 18  $\mu\text{mol}$ ) and TEA (30  $\mu\text{L}$ , 215 mmol) in 90  $\mu\text{L}$  of propionitrile/H<sub>2</sub>O (1/5) was treated with DMC (9.1 mg, 55  $\mu\text{mol}$ ) at 0 °C. The reaction mixture was stirred at 4 °C for 1 h. The mixture was applied to silica gel column chromatography (Iatrobeads 6RS-8060 No.1104) and eluted with CHCl<sub>3</sub>/MeOH/TEA (100/0/1 to 89/11/0.2, 80/20/0.2, *v/v*). The eluent was evaporated *in vacuo*. The residue was purified by gel permeation column chromatography (Sephadex LH20) with CHCl<sub>3</sub>/MeOH/TEA (50/50/1, *v/v*) to give **15** (1.5 mg, 25%); <sup>1</sup>H NMR (600 MHz, CDCl<sub>3</sub>/CD<sub>3</sub>OD = 2 / 1):  $\delta$  5.28-5.24 (m, 1H, *sn*-2), 4.82 (dt, 1H, <sup>1</sup>J<sub>CH</sub> = 162.6 Hz, <sup>3</sup>J<sub>HP</sub> = 7.8 Hz, *J* = 7.8 Hz, H-1), 4.42-4.40 (m, 1H, *sn*-1<sub>a</sub>), 4.21-4.18 (m, 1H, *sn*-1<sub>b</sub>), 4.09-4.02 (m, 3H, *sn*-3, H-6), 3.80-3.74 (m, 1H, H-6'), 3.56-3.39 (m, 2H, H-3, H-5), 3.32-3.25 (m, 2H, H-4, H-2), 3.17-3.14 (m, 6H, N-(CH<sub>2</sub>-CH<sub>3</sub>)<sub>3</sub>), 2.34-2.30 (m, 4H, FA), 1.64-1.58 (m, 4H, FA), 1.35 (t, 9H, *J* = 7.2 Hz, *J* = 7.2 Hz, N-(CH<sub>2</sub>-CH<sub>3</sub>)<sub>3</sub>), 1.33-1.27 (m, 60H, FA), 0.89 (m, 6H, *J* = 7.2 Hz, *J* = 7.2 Hz, FA); <sup>13</sup>C NMR (150 MHz, CDCl<sub>3</sub>/CD<sub>3</sub>OD = 2 / 1):  $\delta$  97.77 (dd, *J* = 46.7 Hz, <sup>2</sup>J<sub>CP</sub> = 4.4 Hz, 2.9 Hz, C-1), 76.79 (t, *J* = 43.1 Hz, *J* = 41.7 Hz, C-5), 75.89 (t, *J* = 38.7 Hz, *J* = 38.9 Hz, C-3), 73.87 (m, *J* = 42.5 Hz, *J* = 42.3 Hz, <sup>3</sup>J<sub>CP</sub> = 7.2 Hz, 7.2 Hz, 5.7 Hz, 7.2 Hz, C-2), 69.92 (t, *J* = 38.7 Hz, *J* = 40.4 Hz, C-4), 61.53 (d, *J* = 43.2 Hz, C-6), 29.41 (FA); <sup>31</sup>P NMR (243 MHz, CDCl<sub>3</sub>/CD<sub>3</sub>OD = 2 / 1)  $\delta$  -2.33 ppm: ESI MS calcd for [<sup>13</sup>C<sub>6</sub>C<sub>41</sub>H<sub>90</sub>O<sub>13</sub>P]<sup>-</sup> requires *m/z* 899.61; found 899.65, HRMS calcd for [<sup>13</sup>C<sub>6</sub>C<sub>41</sub>H<sub>90</sub>O<sub>13</sub>P]<sup>-</sup> requires *m/z* 899.6325; found 899.6333.

$^1\text{H-NMR}$  data of (2-O-Arachidyl-1-O-stearyl-*sn*-glycer-3-yl)  $\beta$ -D- $^{13}\text{C}_6$ -glucopyranosyl phosphate triethylammonium salt:  $^{13}\text{C}_6$ \_PtdGlc (**15**), 600 MHz,  $\text{CDCl}_3/\text{CD}_3\text{OD} = 2/1$

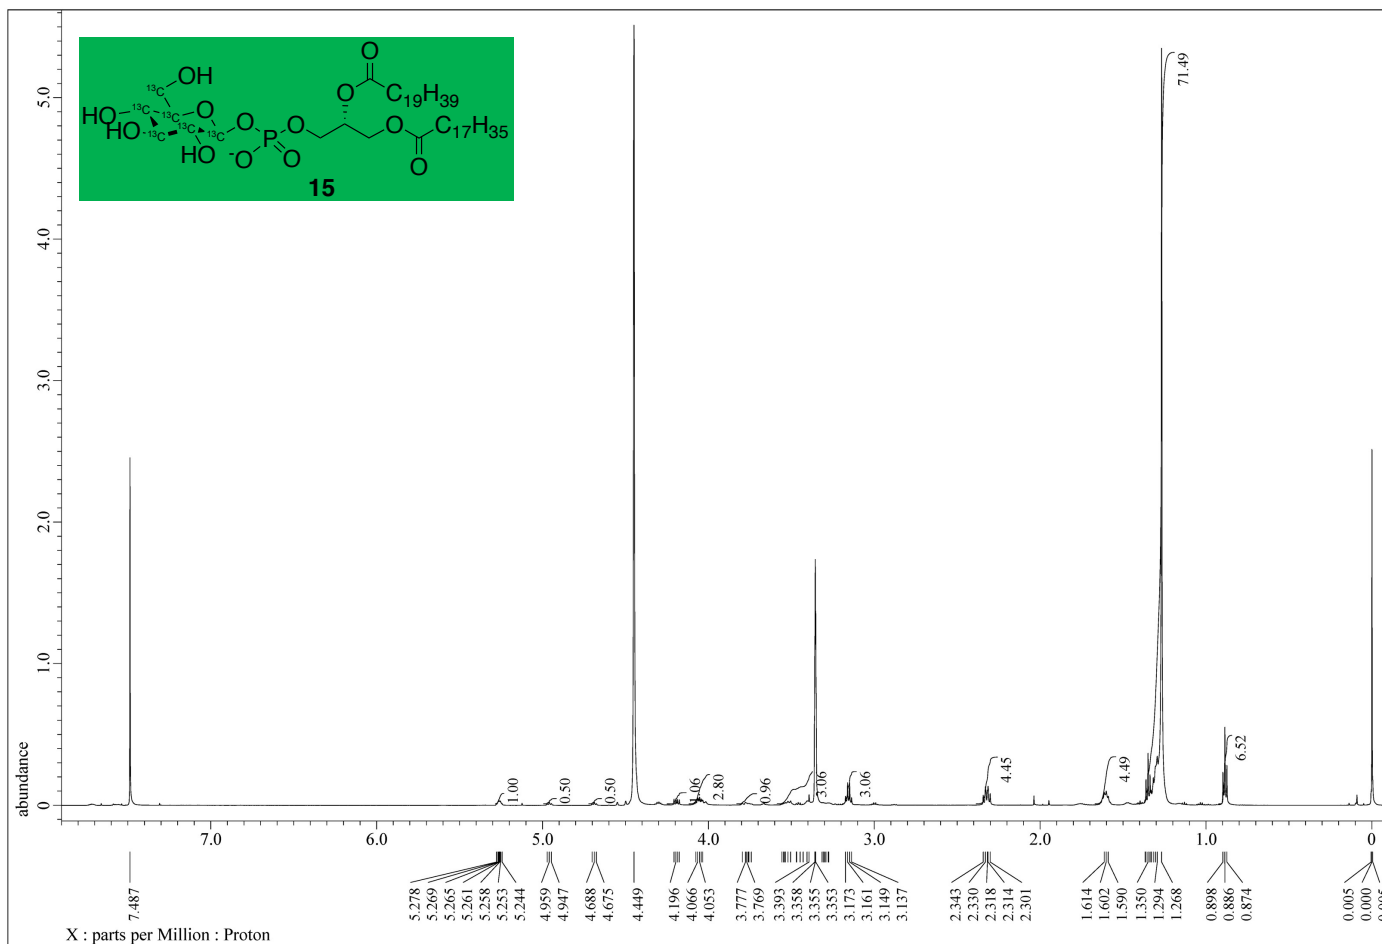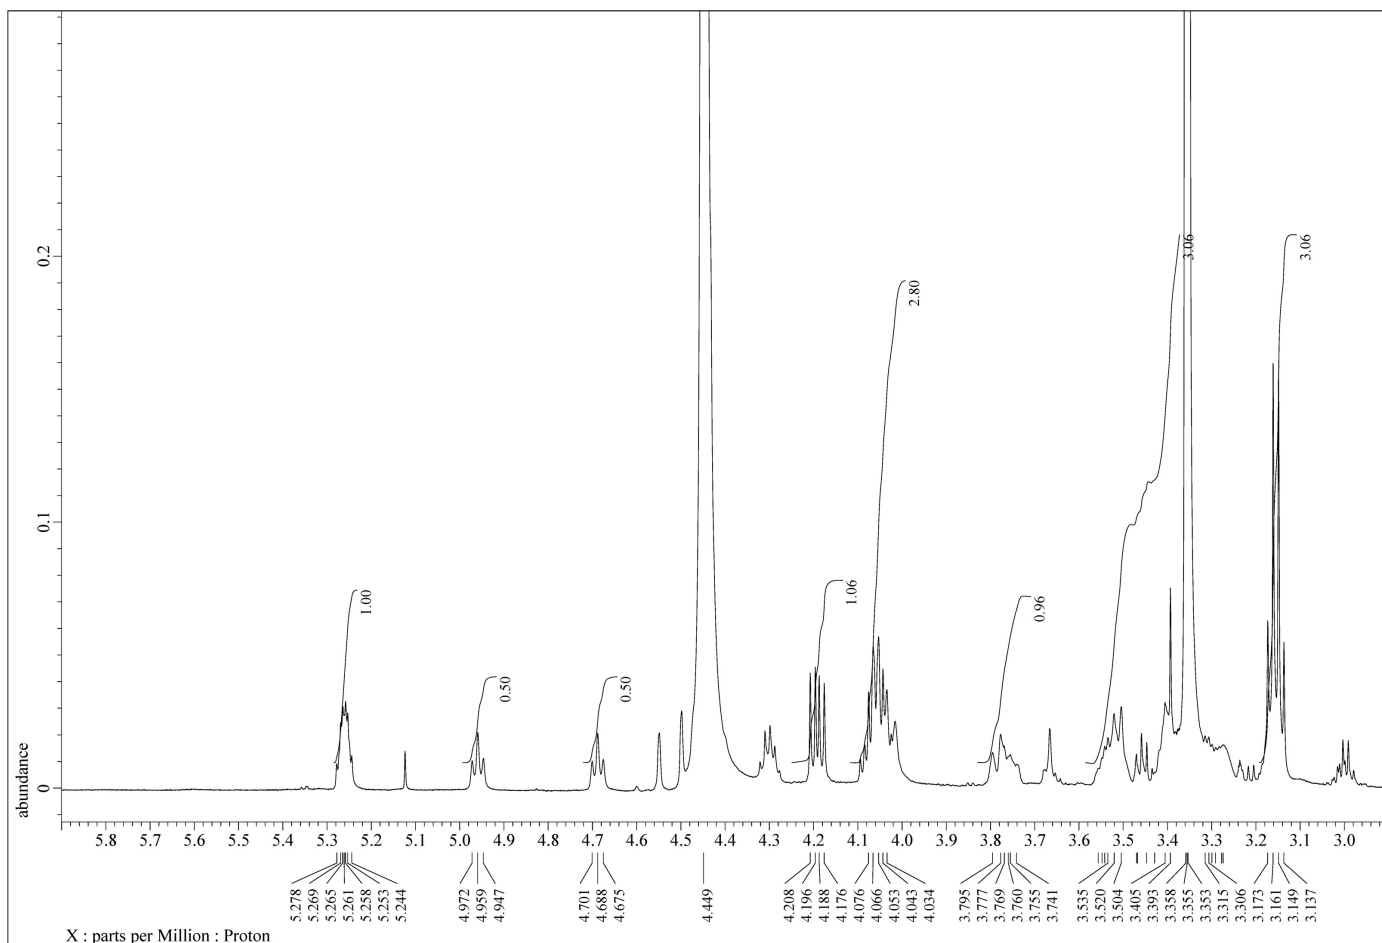

$^{13}\text{C}$ -NMR data of (2-O-Arachidyl-1-O-stearyl-*sn*-glycer-3-yl)  $\beta$ -D- $^{13}\text{C}_6$ -glucopyranosyl phosphate triethylammonium salt:  $^{13}\text{C}_6$ \_PtdGlc (**15**), 600 MHz,  $\text{CDCl}_3/\text{CD}_3\text{OD} = 2/1$

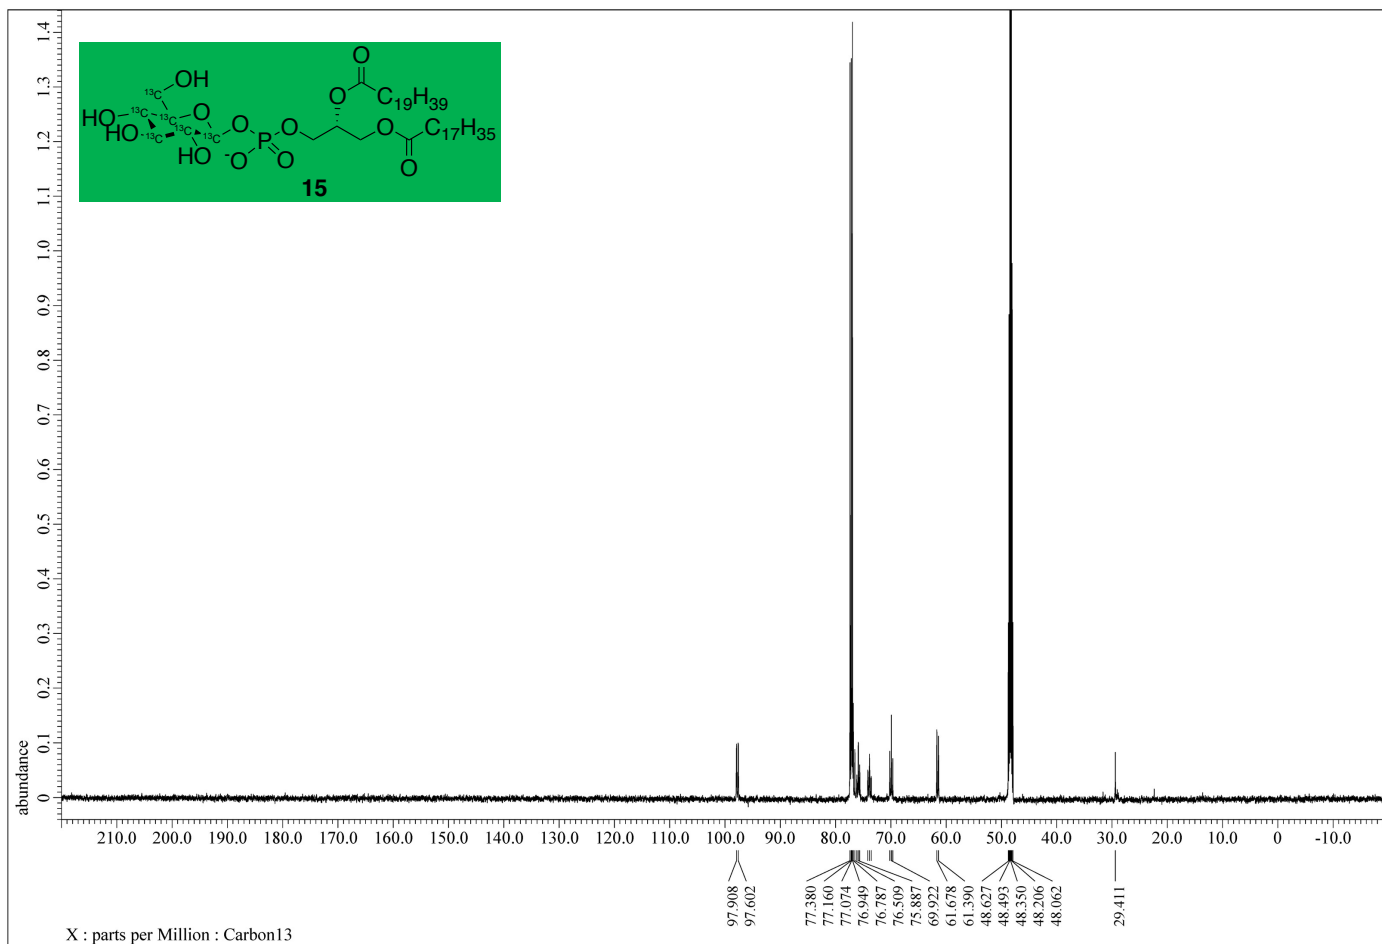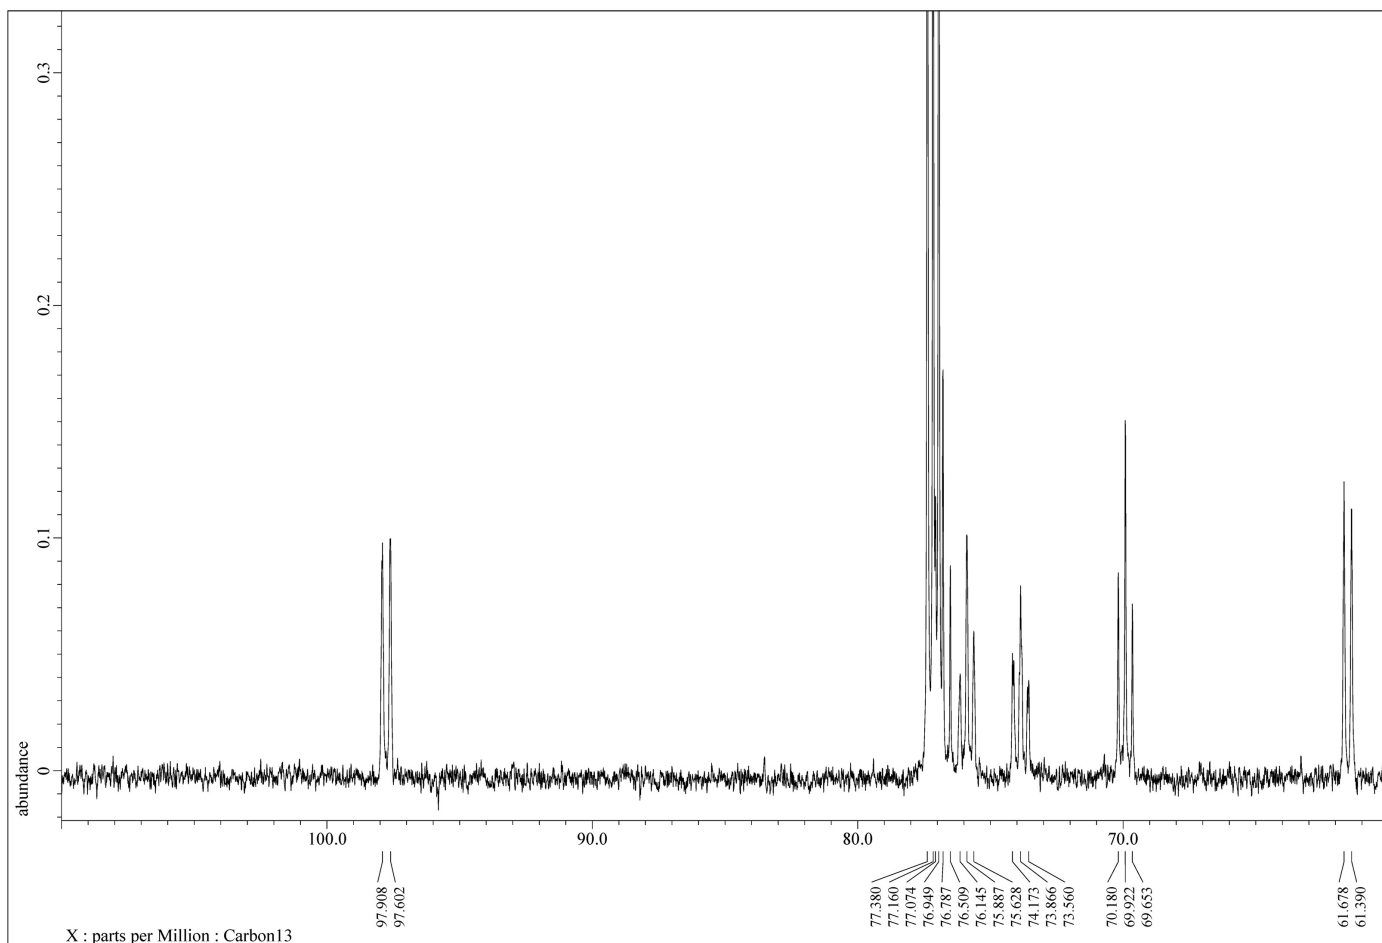

$^{31}\text{P}$ -NMR data of (2-O-Arachidyl-1-O-stearyl-*sn*-glycer-3-yl)  $\beta$ -D- $^{13}\text{C}_6$ -glucopyranosyl phosphate triethylammonium salt:  $^{13}\text{C}_6$ \_PtdGlc (**15**), 243 MHz,  $\text{CDCl}_3/\text{CD}_3\text{OD} = 2/1$

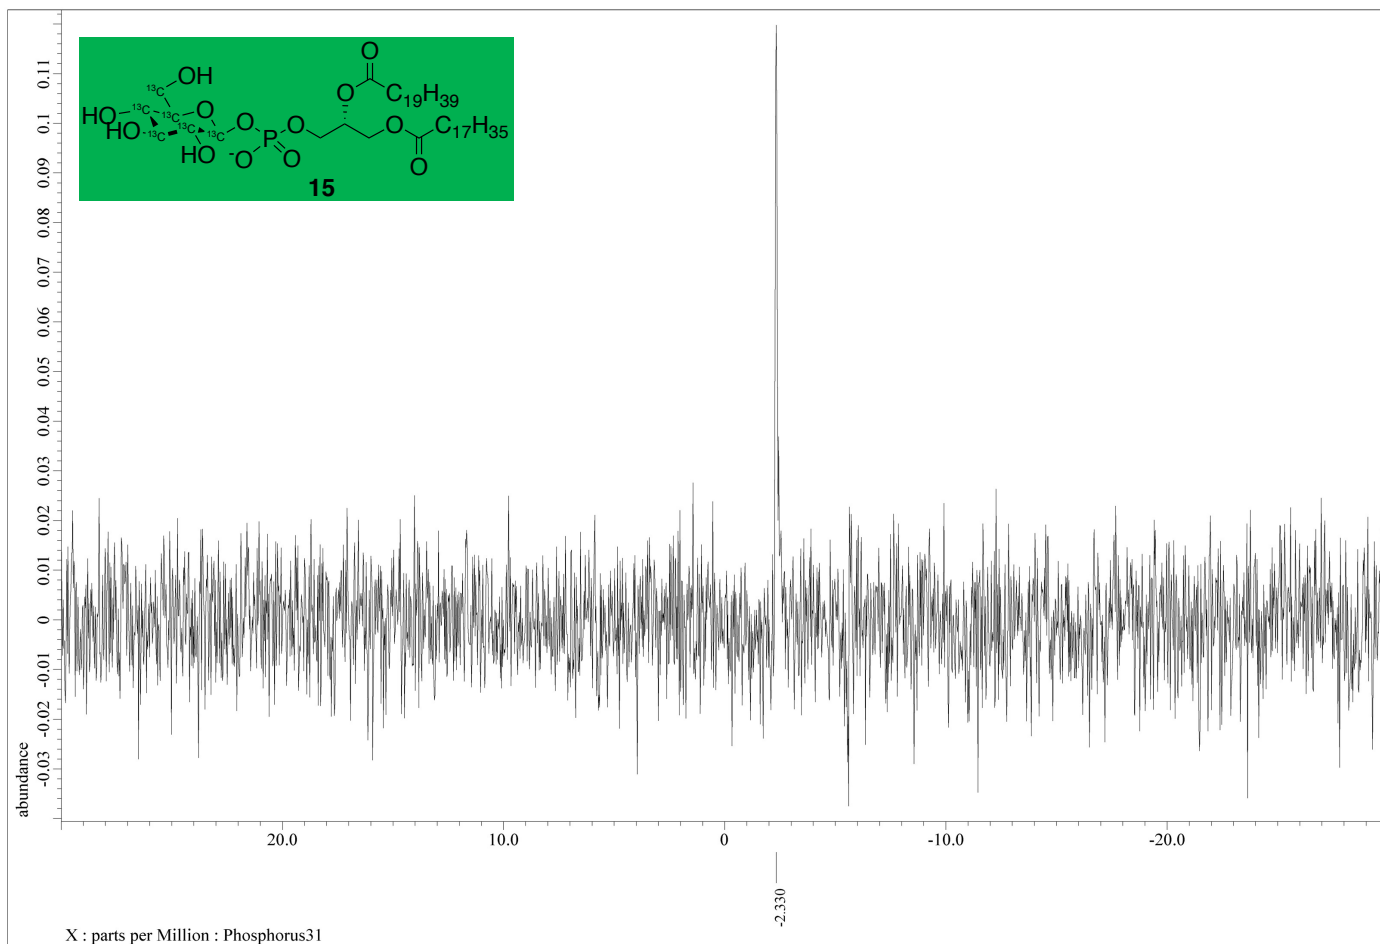

Supplement: d2ob01890j2.pdf [file d2ob01890j2.pdf]
