# Supplementary material for: Ru(ii)-catalysed oxidative (4 + 2) annulation of chromene and coumarin carboxylic acids with alkynes/propargylic alcohols: isolation of Ru(0) complexes
Source: Royal Society of Chemistry journal article supplement (doi:10.1039/d2ob01890j), 2022-12-09
Supplement: d2ob01890j1.pdf [file d2ob01890j1.pdf]

## Supplementary data

### **Ru(II)-catalysed oxidative (4+2) annulation of chromene and coumarin carboxylic acids with alkynes/propargylic alcohols: Isolation of Ru(0) complexes**

**Mallepalli Shankar and K. C. Kumara Swamy\***

School of Chemistry, University of Hyderabad, Hyderabad 500 046, Telangana, India.

E-mail: [kckssc@uohyd.ac.in](mailto:kckssc@uohyd.ac.in); [kckssc@yahoo.com](mailto:kckssc@yahoo.com)

| <b>S. No</b> | <b>Contents</b>                                                                                                                                                                                                                                                                                                                                                                                                         | <b>Page No.</b> |
|--------------|-------------------------------------------------------------------------------------------------------------------------------------------------------------------------------------------------------------------------------------------------------------------------------------------------------------------------------------------------------------------------------------------------------------------------|-----------------|
| 1.           | X-ray data collection, solution, refinement and the ORTEPs/Crystal Data of compounds <b>5aa</b> , <b>5ce</b> , <b>5cj</b> , <b>6aa</b> and <b>7ab</b>                                                                                                                                                                                                                                                                   | S2-S4           |
| 2.           | <sup>1</sup> H and <sup>13</sup> C{ <sup>1</sup> H} NMR spectra of the starting materials <b>1b</b> and <b>1c</b>                                                                                                                                                                                                                                                                                                       | S5-S6           |
| 3.           | <sup>1</sup> H and <sup>13</sup> C NMR spectra of all new compounds (Figures S6-S79)<br>[order: <b>1b</b> , <b>1c</b> ; <b>5aa-5ca</b> ; <b>5ab-5cb</b> ; <b>5ac</b> , <b>5cc</b> ; <b>5ad-5ag</b> ; <b>5bg</b> ; <b>5ce</b> ; <b>5ah-ak</b> ;<br><b>5bh-bj</b> ; <b>5ci-cj</b> , <b>5'al</b> ; <b>6aa-bc</b> , <b>6da</b> ; <b>7aa-ac</b> , <b>7ae</b> , <b>7ag</b> , <b>7ai-aj</b> and <b>7'ba</b> ,<br><b>7'ca</b> ] | S7-S46          |
| 4.           | Reference                                                                                                                                                                                                                                                                                                                                                                                                               | S47             |

### Crystallographic data for compounds 5aa, 5ce, 5cj, 6aa and 7ab

Single crystal X-ray data for crystals of compounds **5aa**, **5ce**, **5cj**, **6aa** and **7ab** were collected on an X-ray diffractometer using Mo-K $\alpha$  ( $\lambda = 0.71073 \text{ \AA}$ ) radiation after mounting on glass fibers inside a brass pin in open air. The structures were solved by direct methods and refined by full matrix least squares method using standard procedures; absorption corrections were done using SADABS program, where applicable.<sup>1</sup> In general, all non-hydrogen atoms were refined anisotropically; hydrogen atoms were fixed by geometry or located by a Difference Fourier map and refined isotropically. CCDC numbers are 2213160-2213164.

#### *ORTEPs and crystal data of 5aa, 5ce, 5cj, 6aa and 7ab (Figures S1-S5)*

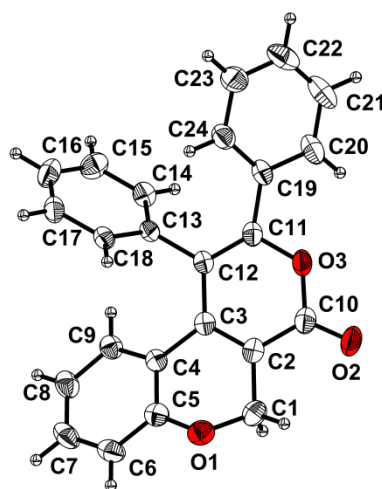

**Figure S1.** ORTEP view of compound **5aa** with 30% probability of ellipsoids. **Crystal data:** C<sub>24</sub>H<sub>16</sub>O<sub>3</sub>,  $M = 352.37$ , Orthorhombic, Space group  $Pna2 (1)$ ,  $a = 7.9771(3)$ ,  $b = 14.2651(6)$ ,  $c = 15.4453(7) \text{ \AA}$ ,  $V = 1757.58(13) \text{ \AA}^3$ ,  $Z = 4$ ,  $\mu = 0.087 \text{ mm}^{-1}$ , data/restraints/parameters: 2973/1/245, R indices ( $I > 2\sigma(I)$ ):  $R1 = 0.0288$ ,  $wR2$  (all data) = 0.0747. Solvent for crystallization: EtOAc + hexane. CCDC No: 2213160.

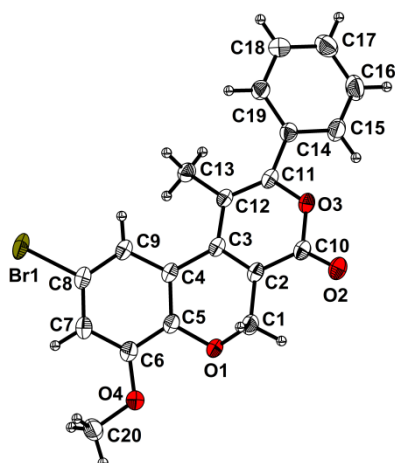

**Figure S2.** ORTEP view of compound **5ce** with 30% probability of ellipsoids. **Crystal data:**  $C_{21}H_{15}BrClO_4$ ,  $M = 446.69$ , Monoclinic, Space group  $P2(1)/c$ ,  $a = 16.4674(10)$ ,  $b = 7.5481(5)$ ,  $c = 16.6864(10)$  Å,  $V = 1837.3(2)$  Å<sup>3</sup>,  $\beta = 117.646(2)^\circ$ ,  $Z = 4$ ,  $\mu = 2.408$  mm<sup>-1</sup>, data/restraints/parameters: 3187/0/246, R indices ( $>2\sigma(I)$ ):  $R1 = 0.0462$ ,  $wR2$  (all data) = 0.1320. Solvent for crystallization: DCM + hexane. CCDC No: 2213161.

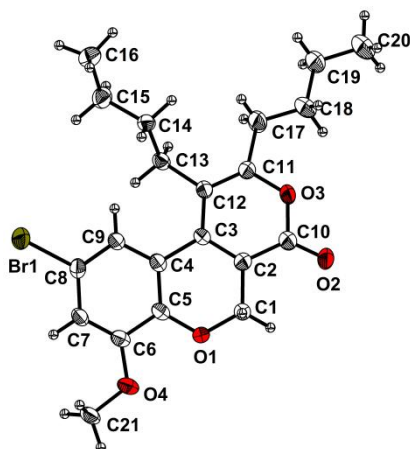

**Figure S3.** ORTEP view of compound **5cj** with 30% probability of ellipsoids. **Crystal data:**  $C_{21}H_{25}BrO_4$ ,  $M = 421.32$ , Monoclinic, Space group  $P 1 2 1 1$ ,  $a = 5.1663(2)$ ,  $b = 14.7442(5)$ ,  $c = 12.9318(5)$  Å,  $V = 974.41(6)$  Å<sup>3</sup>,  $\beta = 98.432(4)^\circ$ ,  $Z = 2$ ,  $\mu = 2.132$  mm<sup>-1</sup>, data/restraints/parameters: 2954/1/238, R indices ( $>2\sigma(I)$ ):  $R1 = 0.0544$ ,  $wR2$  (all data) = 0.1402. Solvent for crystallization: EtOAc + hexane. CCDC No: 2213162.

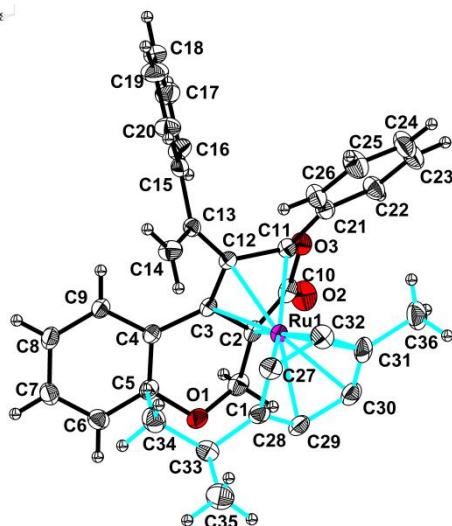

**Figure S4.** ORTEP view of compound **6aa** with 30% probability of ellipsoids. **Crystal data:**  $C_{36}H_{32}O_3Ru$ ,  $M = 613.72$ , Monoclinic, Space group  $P2(1)/c$ ,  $a = 18.2137(11)$   $b = 9.1058(6)$   $c = 17.3141(10)$  Å,  $V = 2781.2(3)$  Å<sup>3</sup>,  $\beta = 104.407(2)^\circ$   $Z = 4$ ,  $\mu = 0.600$  mm<sup>-1</sup>, data/restraints/parameters: 4886/0/364, R indices ( $>2\sigma(I)$ ):  $R1 = 0.0201$ ,  $wR2$  (all data) = 0.0543. Solvent for crystallization: EtOAc + hexane. CCDC No: 2213163.

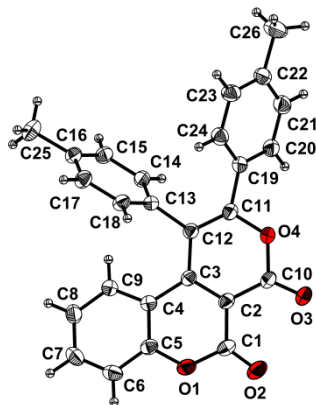

**Figure S5.** ORTEP view of compound **7ab** with 30% probability of ellipsoids. **Crystal data:**  $C_{26}H_{18}O_4$ ,  $M = 394.40$ , Orthorhombic, Space group  $Fdd2$ ,  $a = 52.655(4)$ ,  $b = 7.5681(4)$ ,  $c = 19.8301(12)$  Å,  $V = 7902.3(9)$  Å<sup>3</sup>,  $Z = 16$ ,  $\mu = 0.089$  mm<sup>-1</sup>, data/restraints/parameters: 3261/1/274, R indices ( $>2\sigma(I)$ ):  $R1 = 0.0339$ ,  $wR2$  (all data) = 0.0873. Solvent for crystallization: EtOAc + hexane. CCDC No: 2213164.

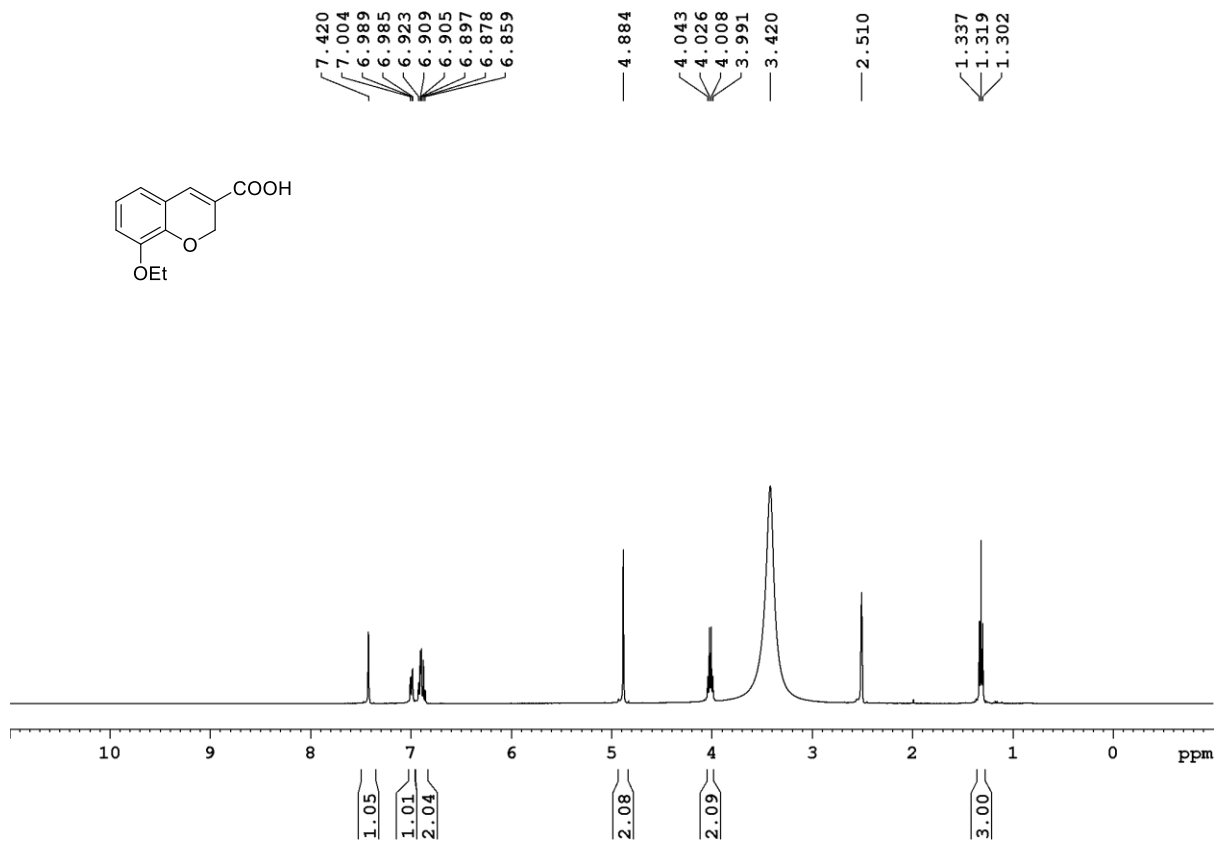

**Figure S6.**  $^1\text{H}$  NMR spectrum of compound **1b**

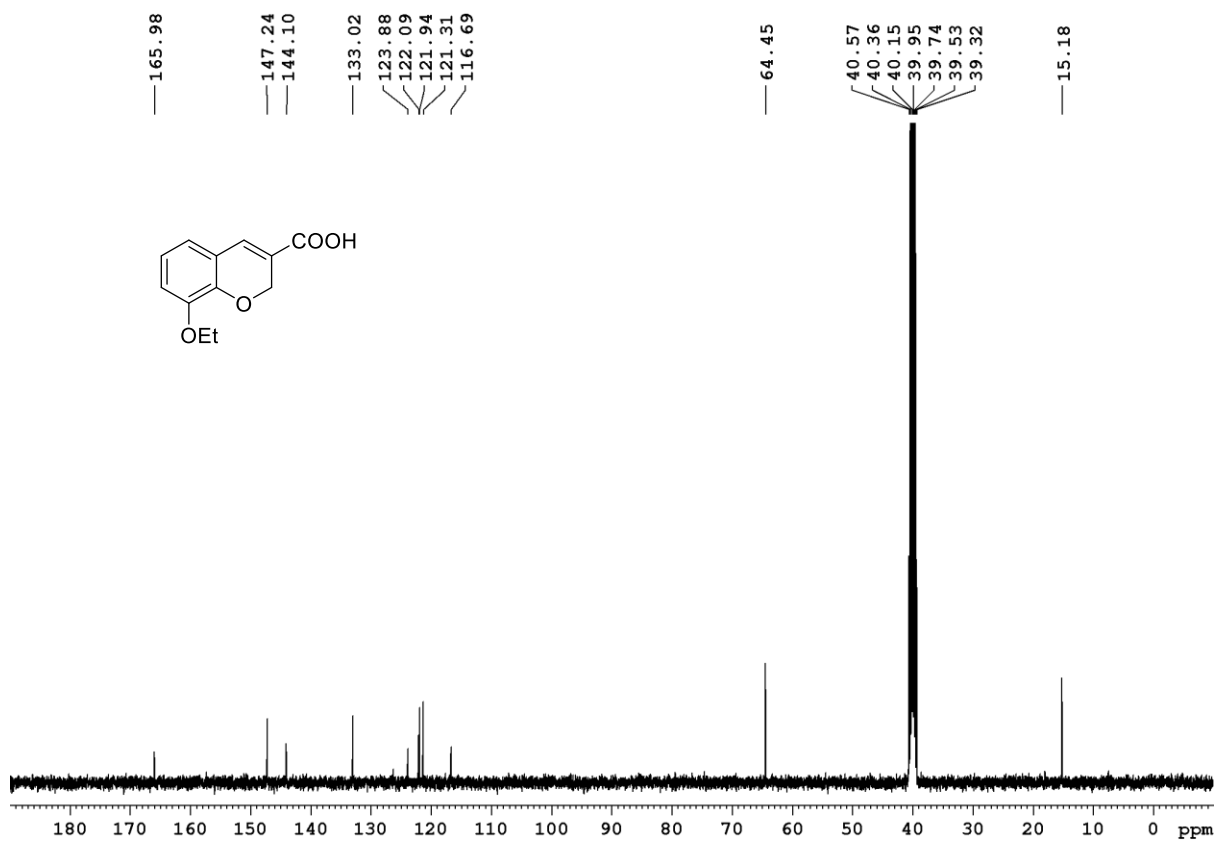

**Figure S7.**  $^{13}\text{C}\{^1\text{H}\}$  NMR spectrum of compound **1b**

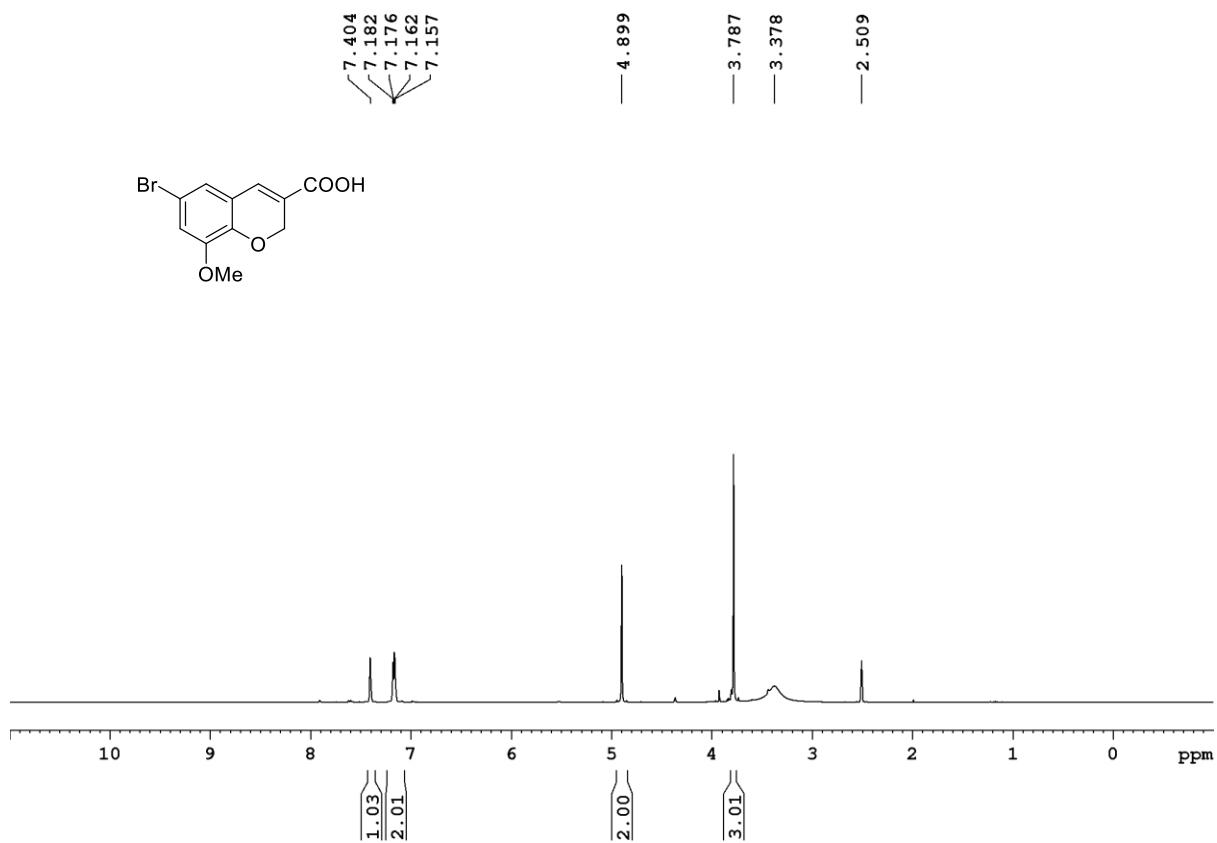

**Figure S8.**  $^1\text{H NMR}$  spectrum of compound 1c

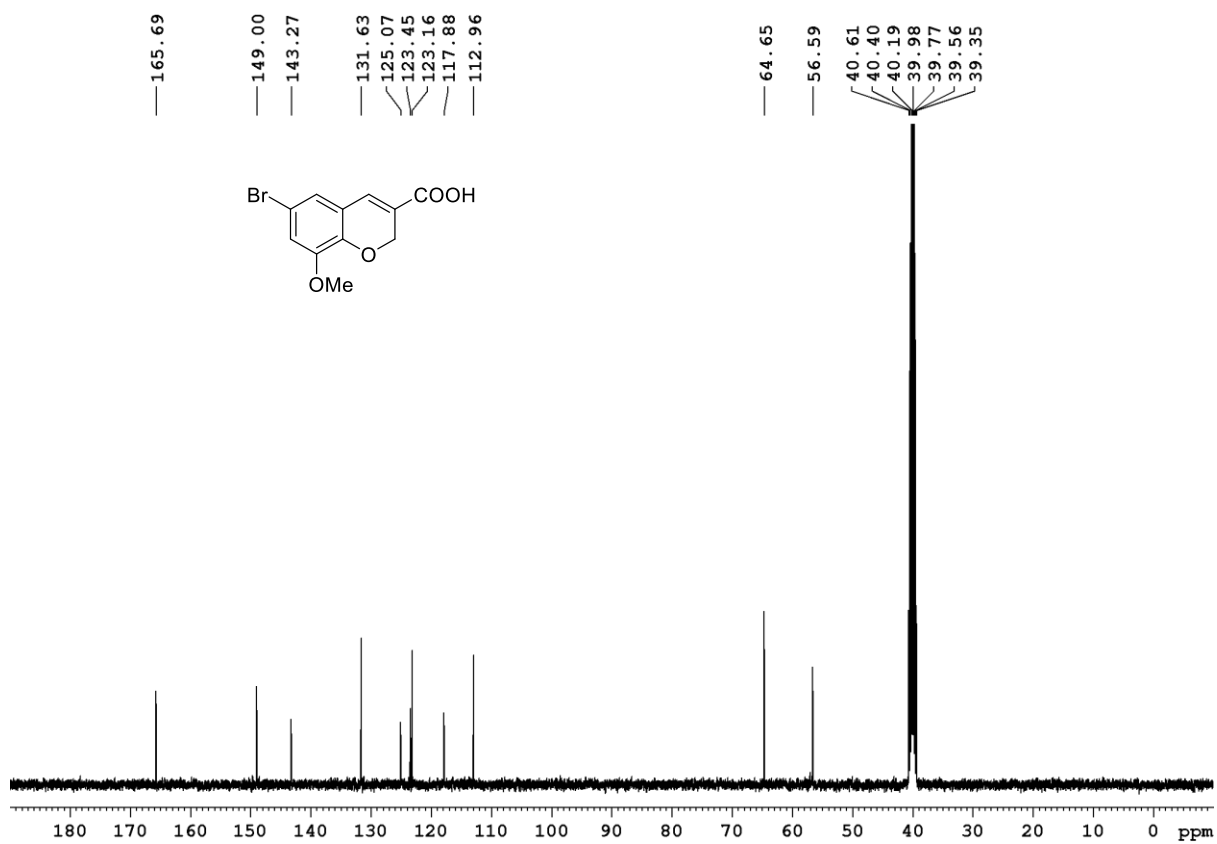

**Figure S9.**  $^{13}\text{C}\{^1\text{H}\}$  NMR spectrum of compound 1c

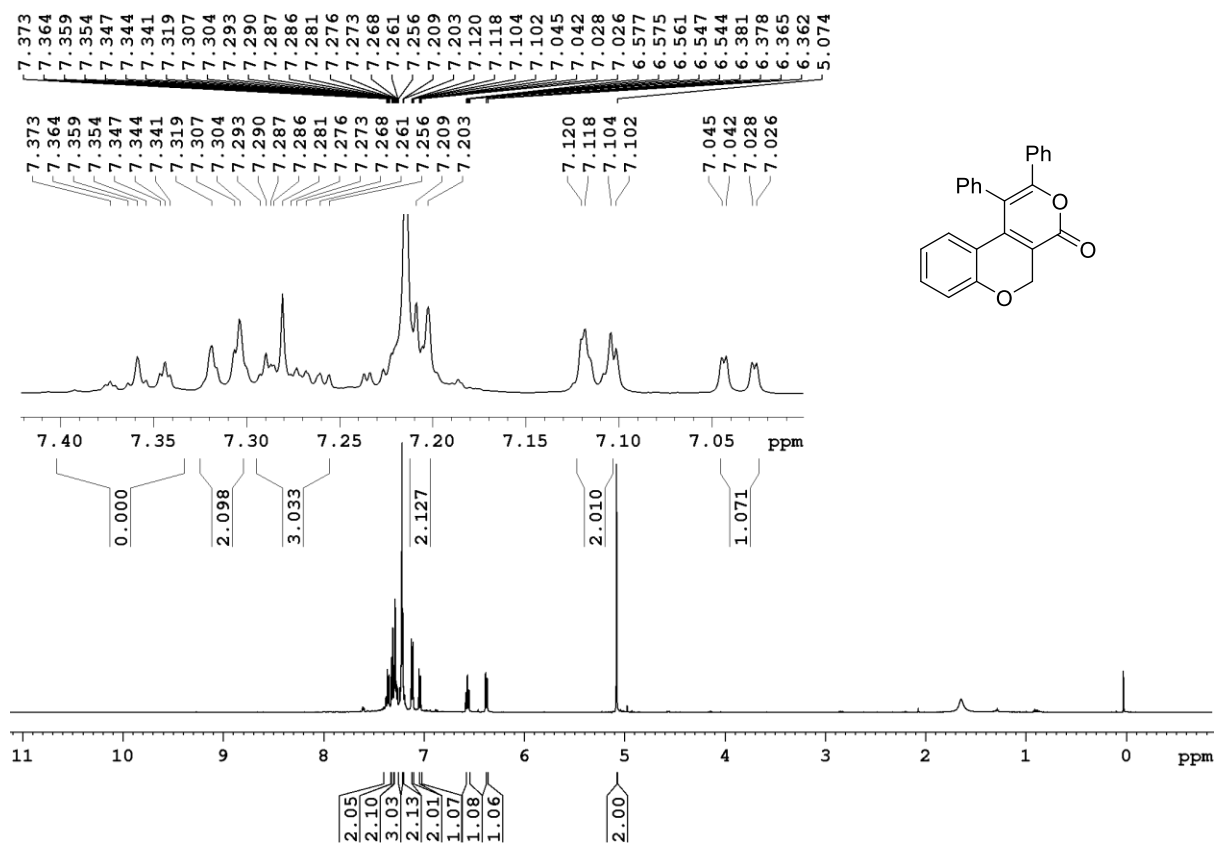

Figure S10. <sup>1</sup>H NMR spectrum of compound 5aa

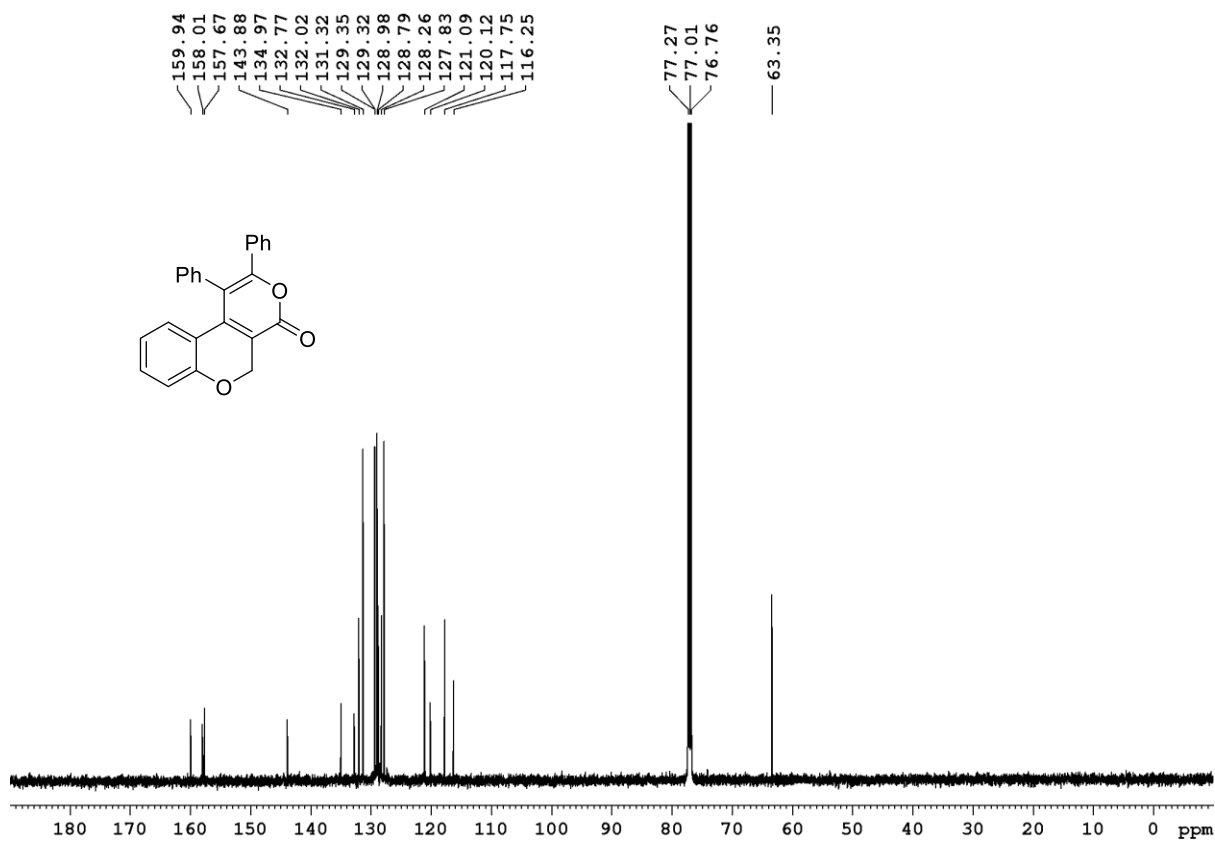

Figure S11. <sup>13</sup>C{<sup>1</sup>H} NMR spectrum of compound 5aa

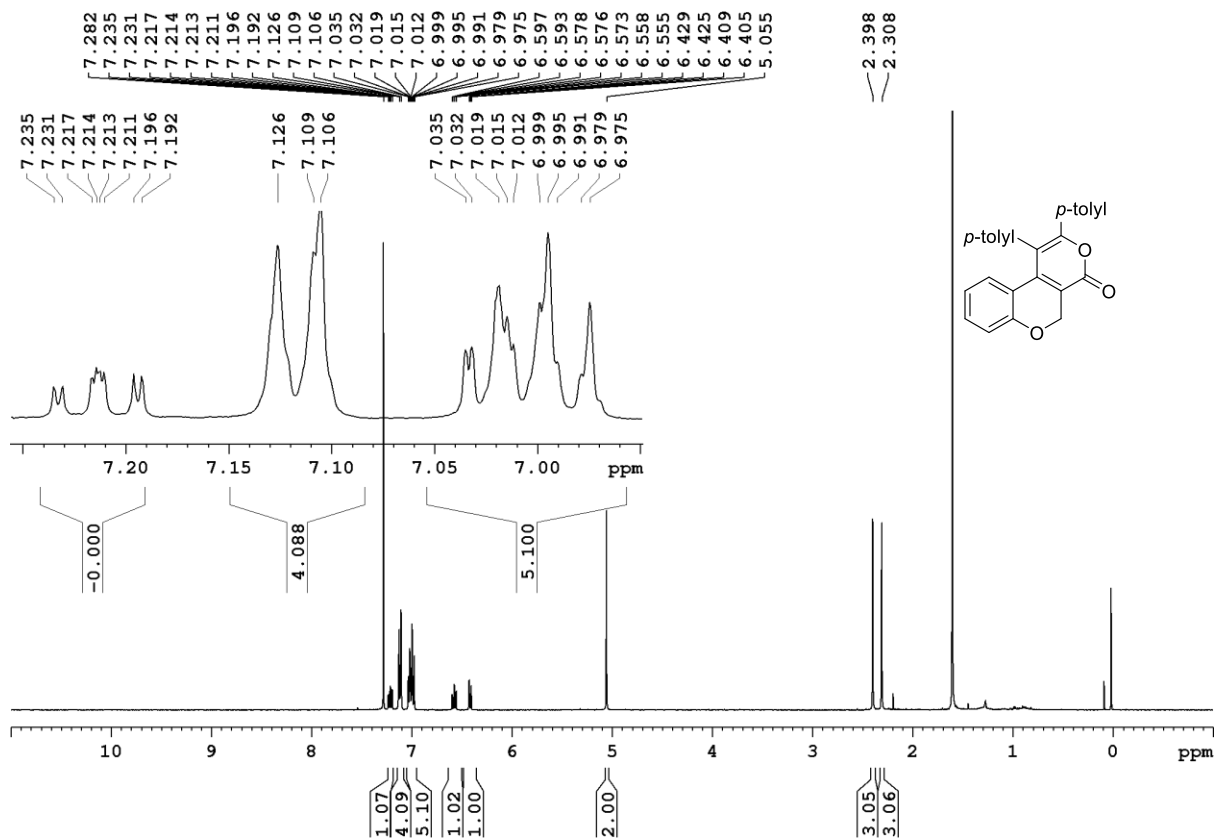

Figure S12.  $^1\text{H NMR}$  spectrum of compound 5ab

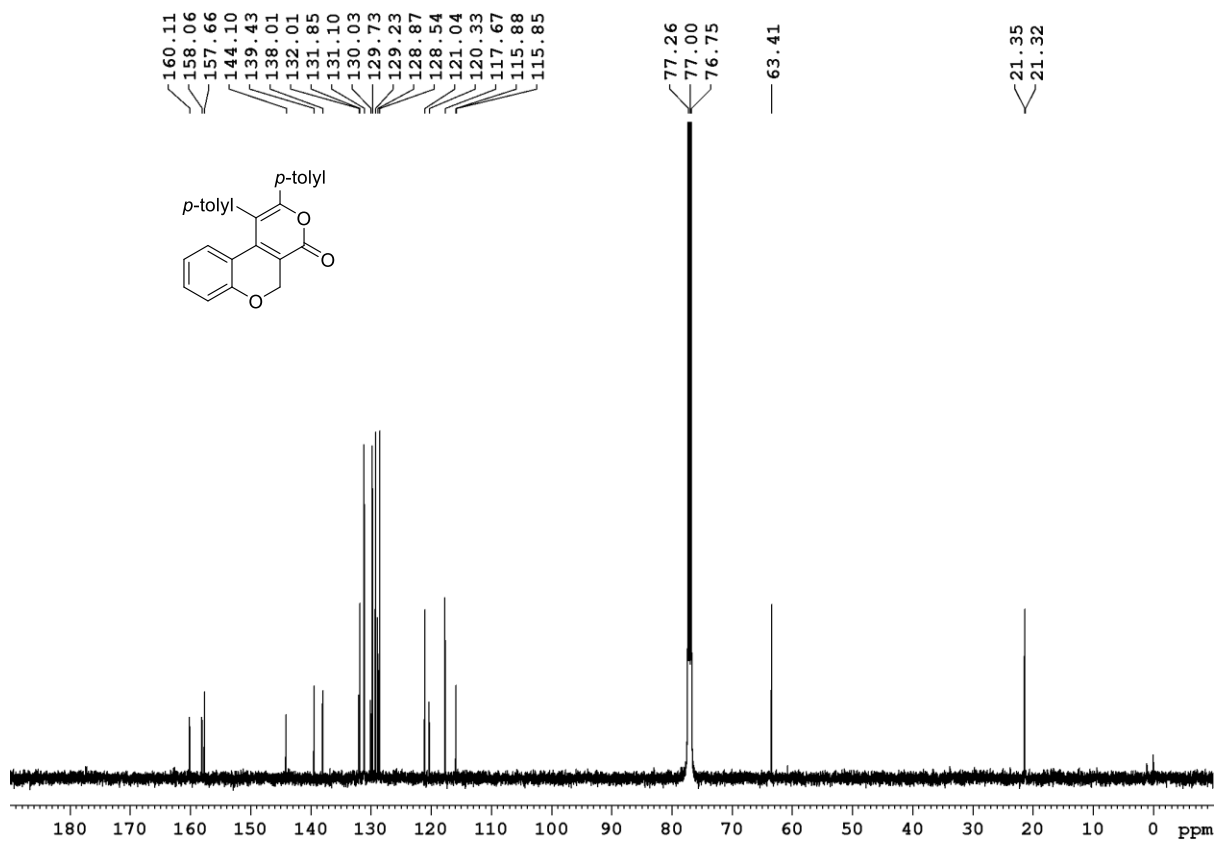

Figure S13.  $^{13}\text{C}\{^1\text{H}\}$  NMR spectrum of compound 5ab



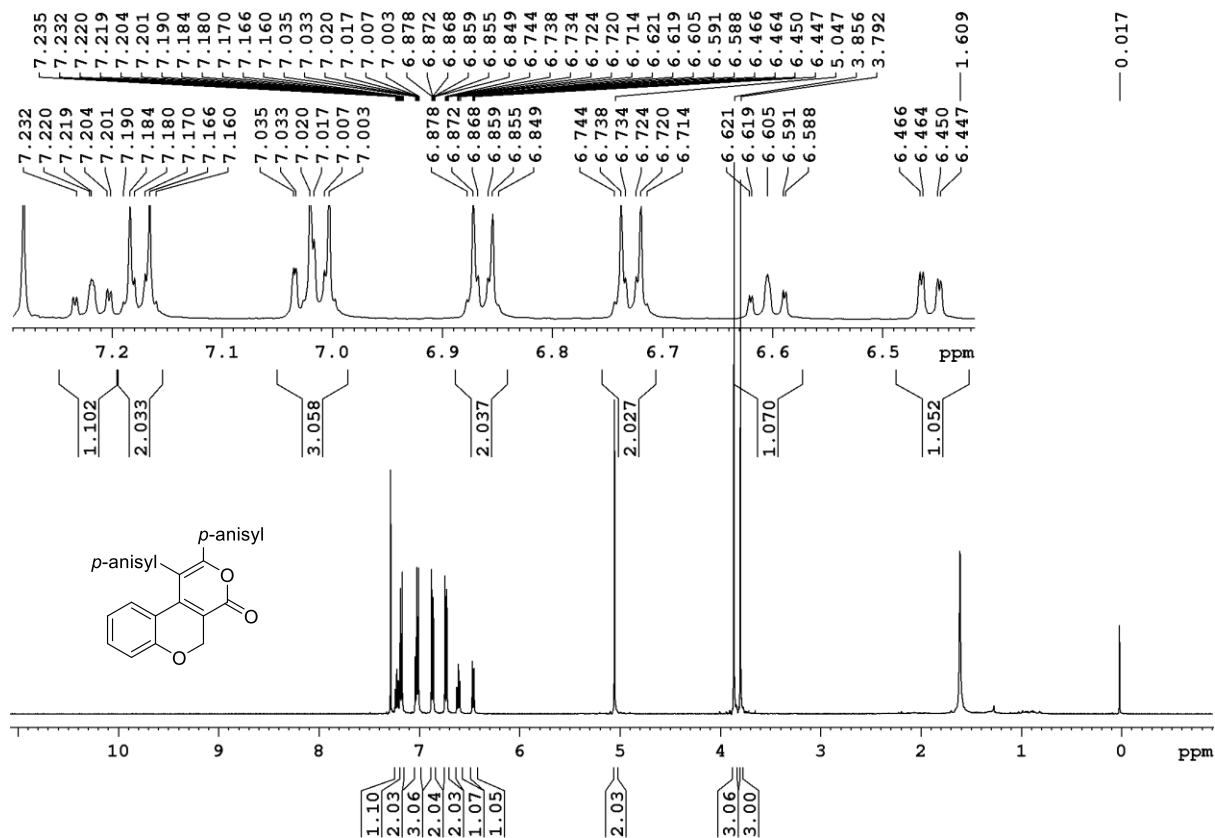

Figure S14. <sup>1</sup>H NMR spectrum of compound 5ac

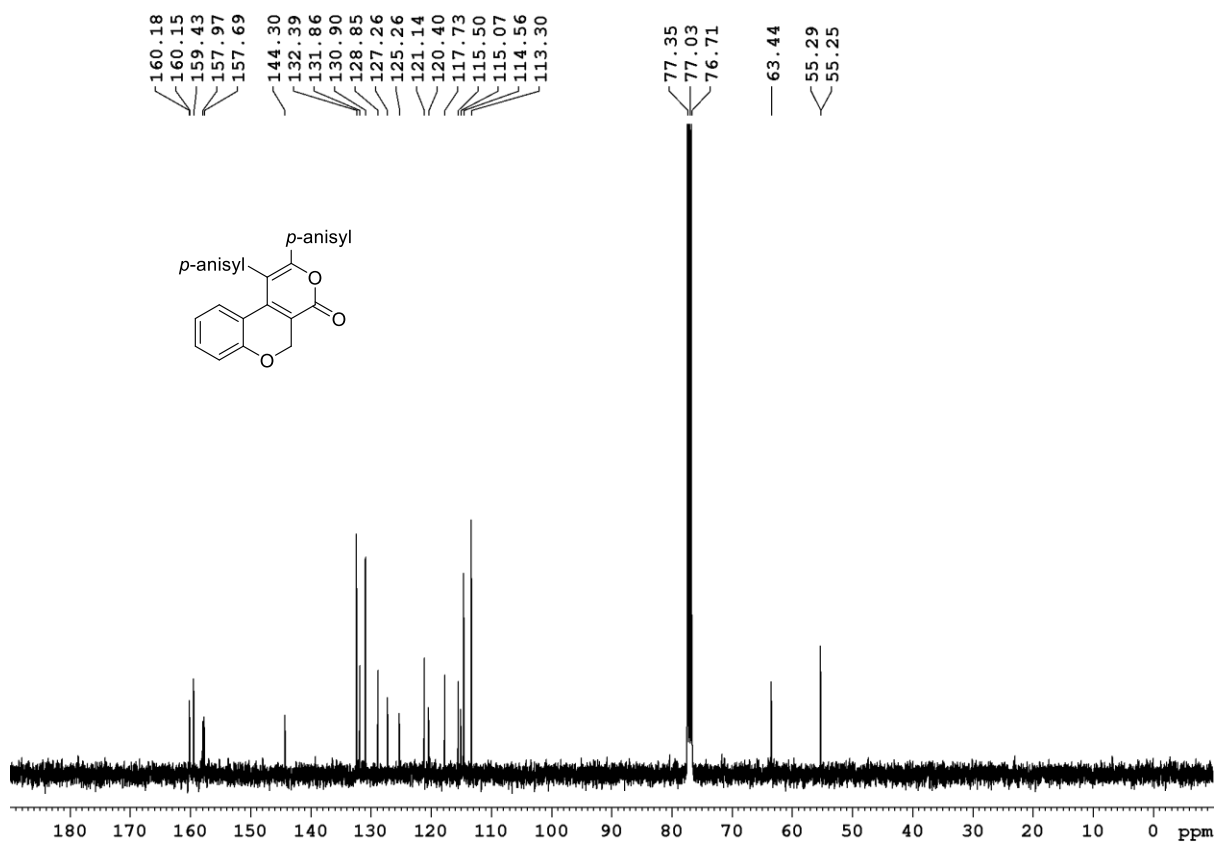

Figure S15. <sup>13</sup>C{<sup>1</sup>H} NMR spectrum of compound 5ac

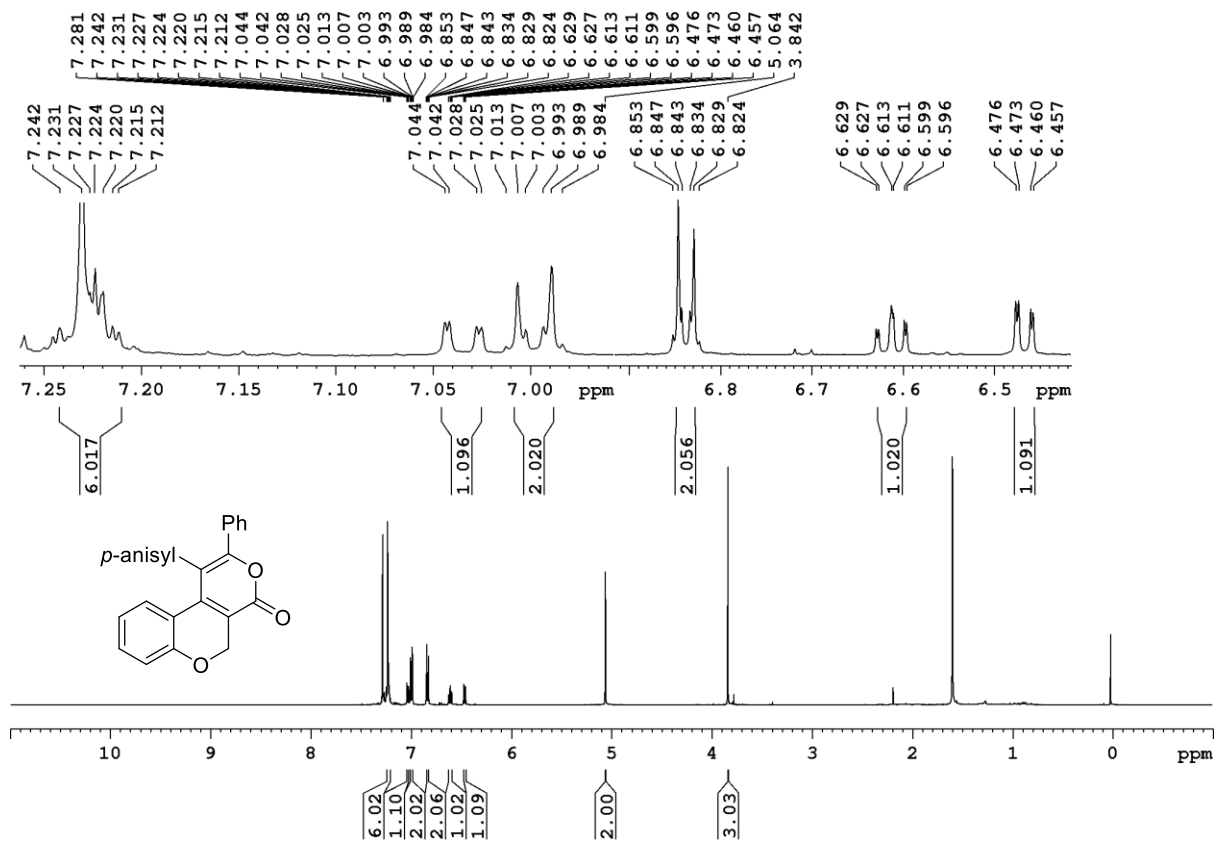

Figure S16. <sup>1</sup>H NMR spectrum of compound 5ad

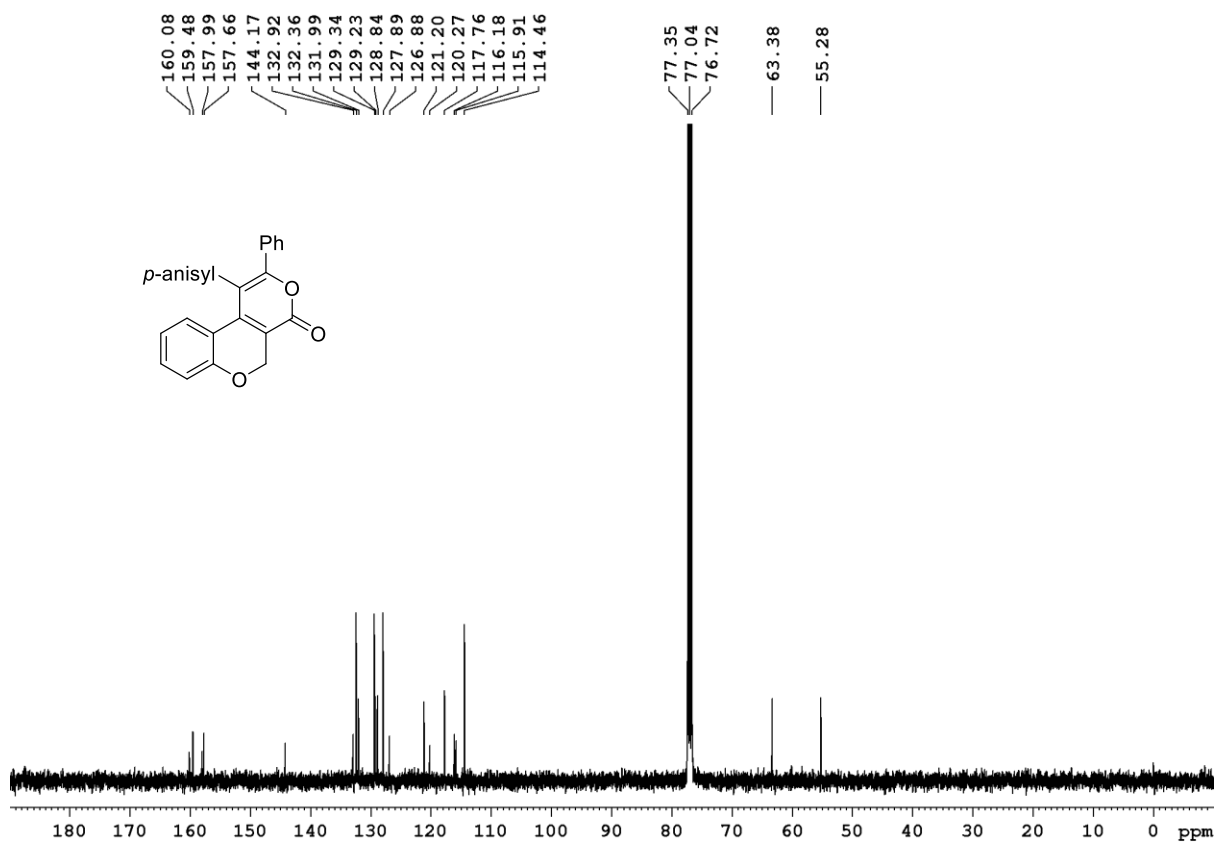

Figure S17. <sup>13</sup>C{<sup>1</sup>H} NMR spectrum of compound 5ad

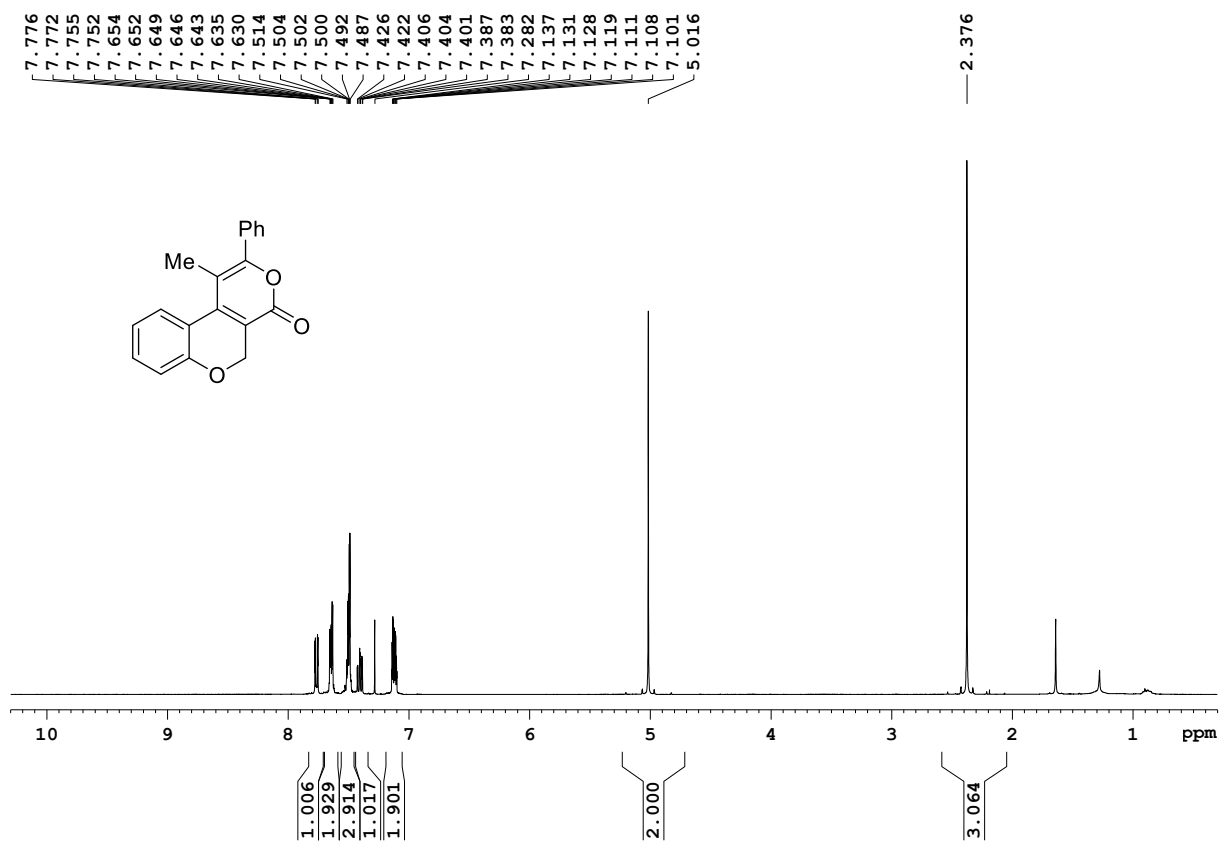

**Figure S18.**  $^1\text{H NMR}$  spectrum of compound 5ae

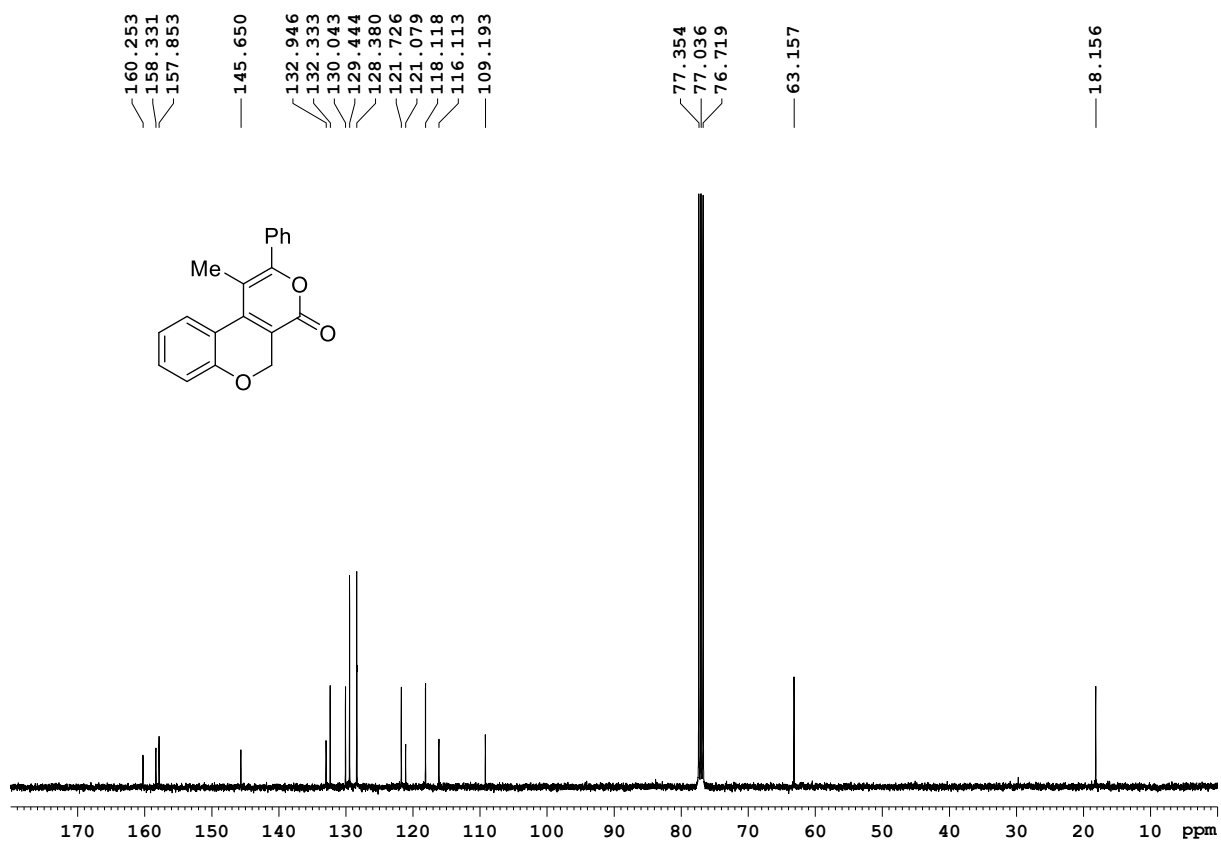

**Figure S19.**  $^{13}\text{C}\{^1\text{H}\}$  NMR spectrum of compound 5ae

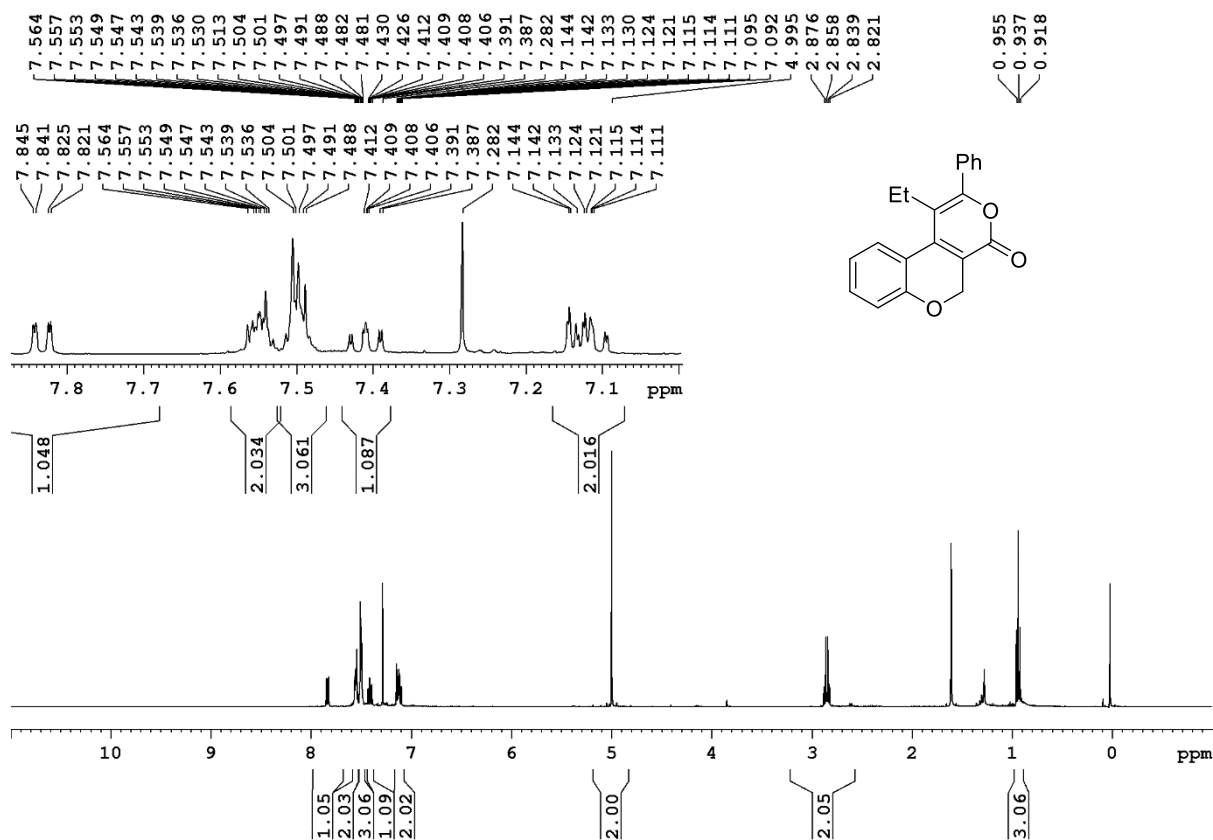

Figure S20.  $^1\text{H}$  NMR spectrum of compound 5af

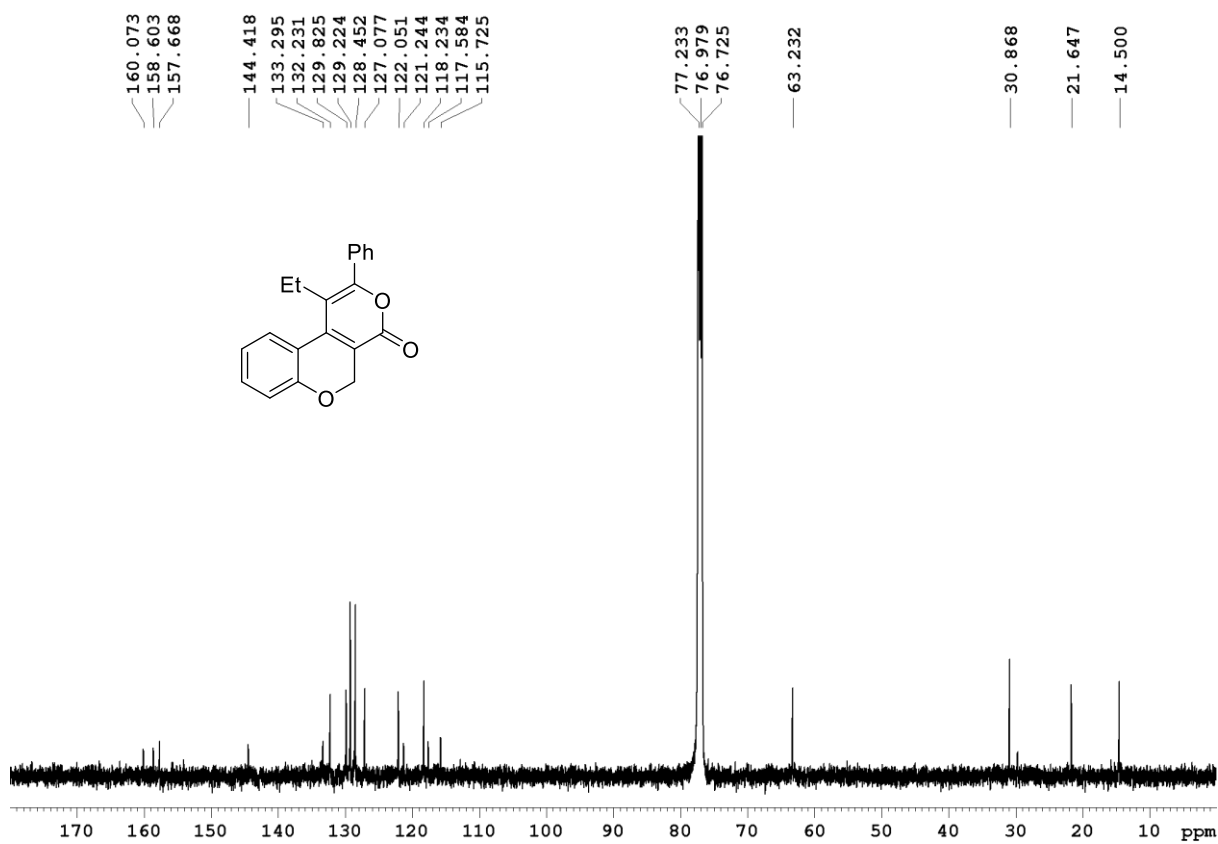

Figure S21.  $^{13}\text{C}\{^1\text{H}\}$  NMR spectrum of compound 5af

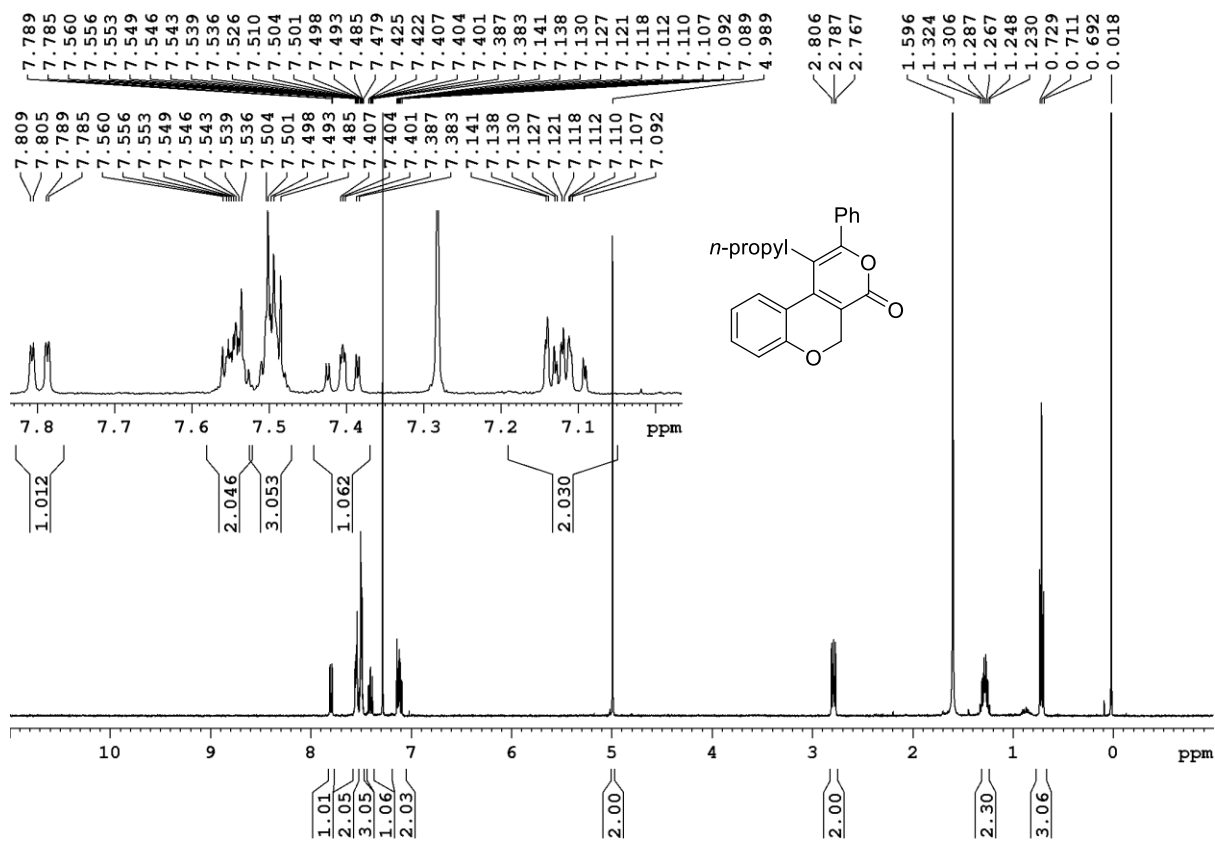

**Figure S22.  $^1\text{H}$  NMR spectrum of compound **5ag****

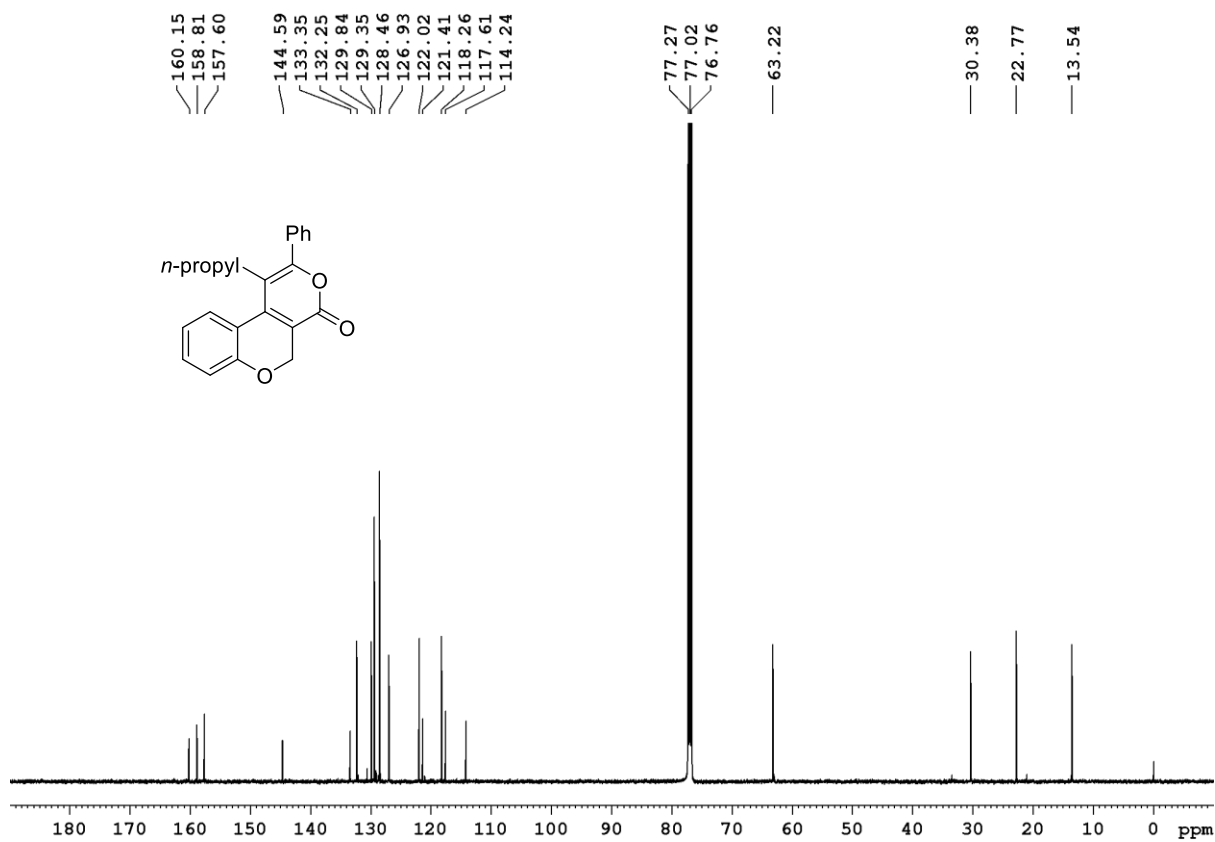

**Figure S23.  $^{13}\text{C}\{^1\text{H}\}$  NMR spectrum of compound **5ag****

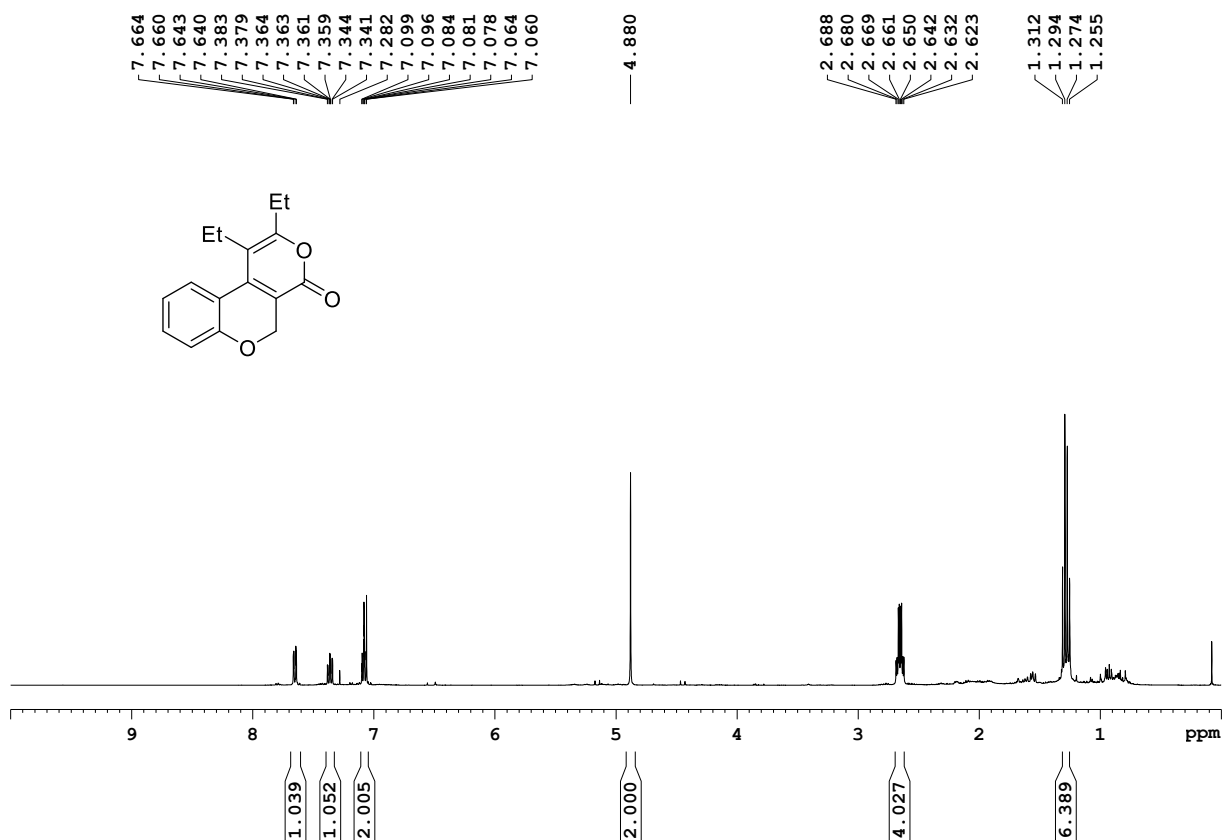

Figure S24.  $^1\text{H NMR}$  spectrum of compound 5ah

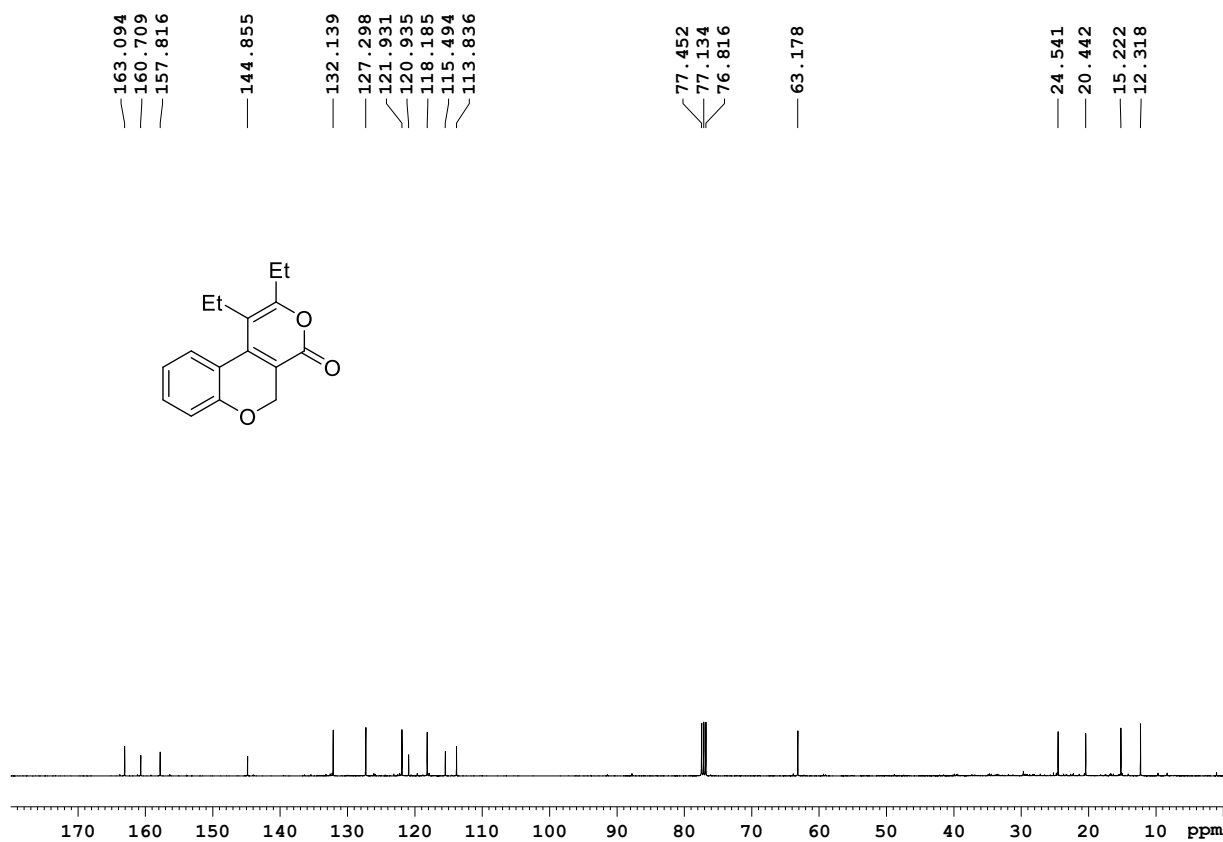

Figure S25.  $^{13}\text{C}\{^1\text{H}\}$  NMR spectrum of compound 5ah

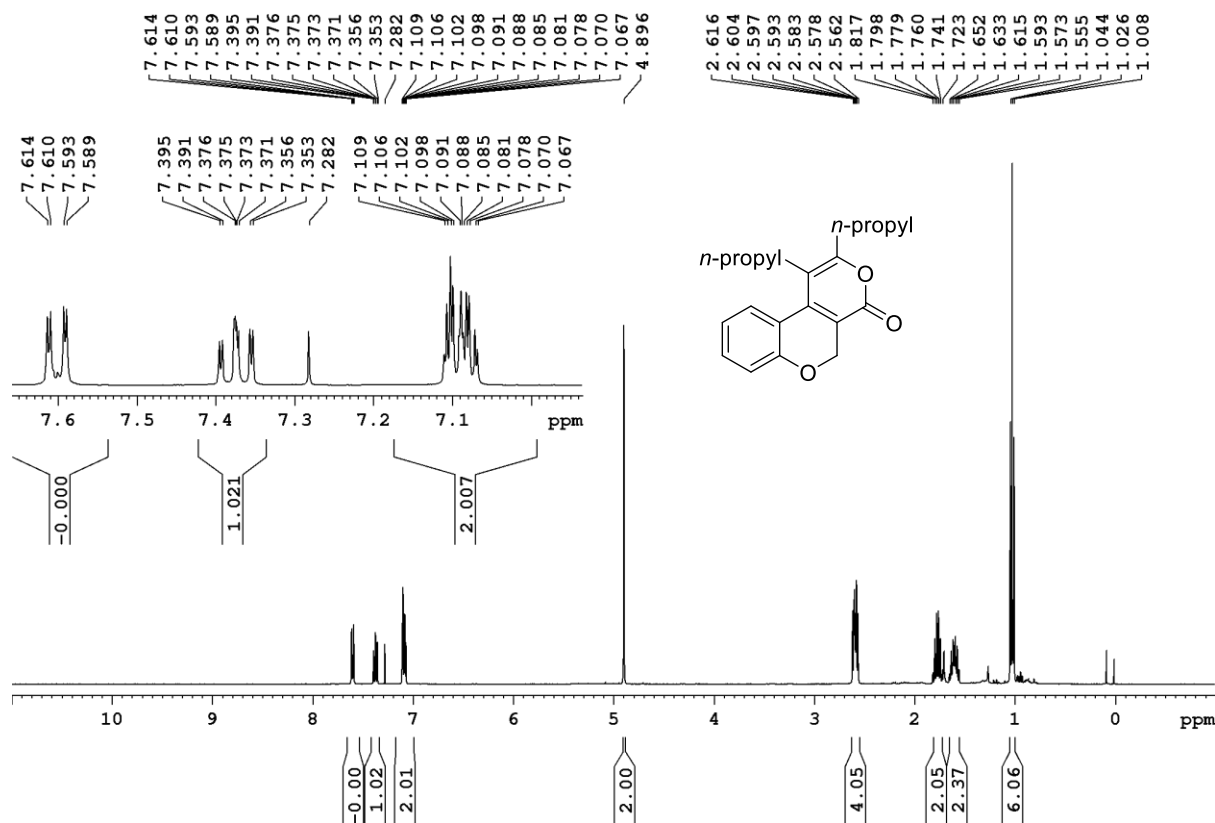

**Figure S26.**  $^1\text{H}$  NMR spectrum of compound **5ai**

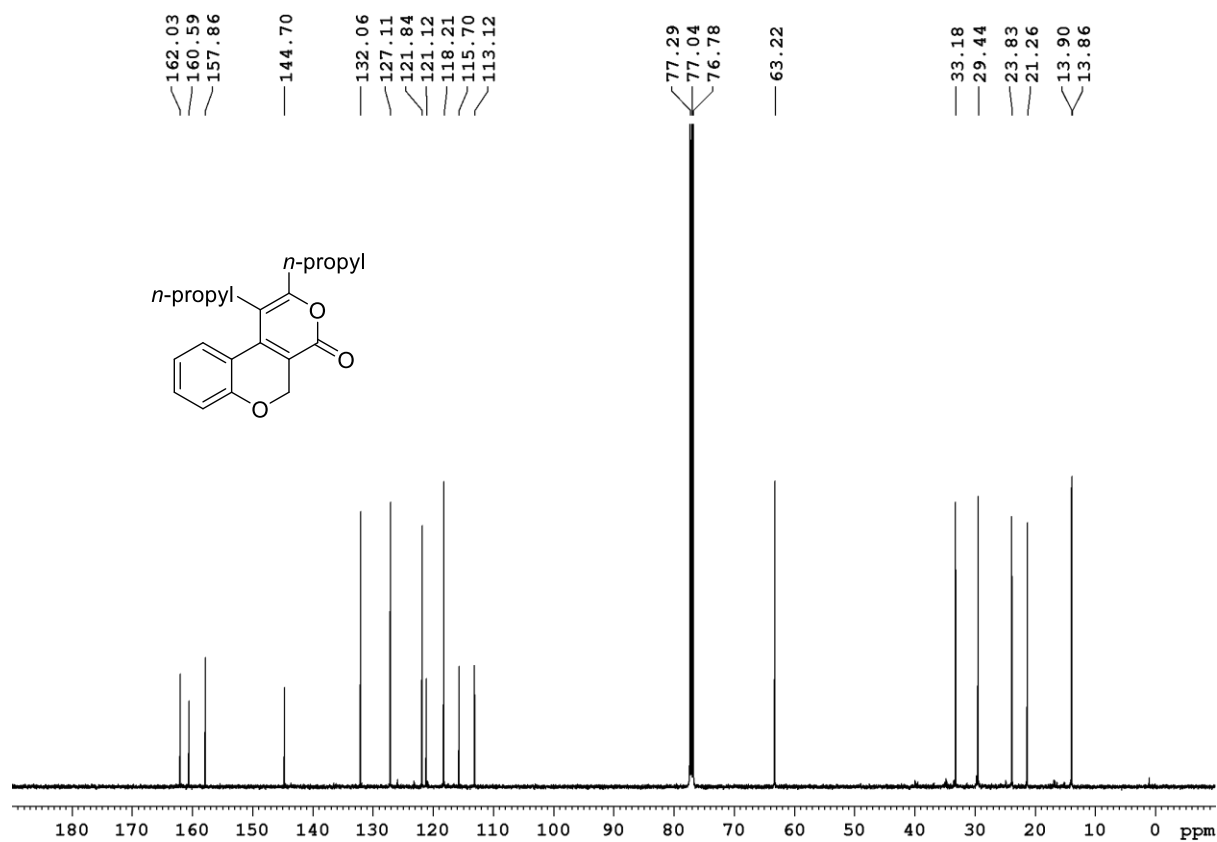

**Figure S27.**  $^{13}\text{C}\{^1\text{H}\}$  NMR spectrum of compound **5ai**

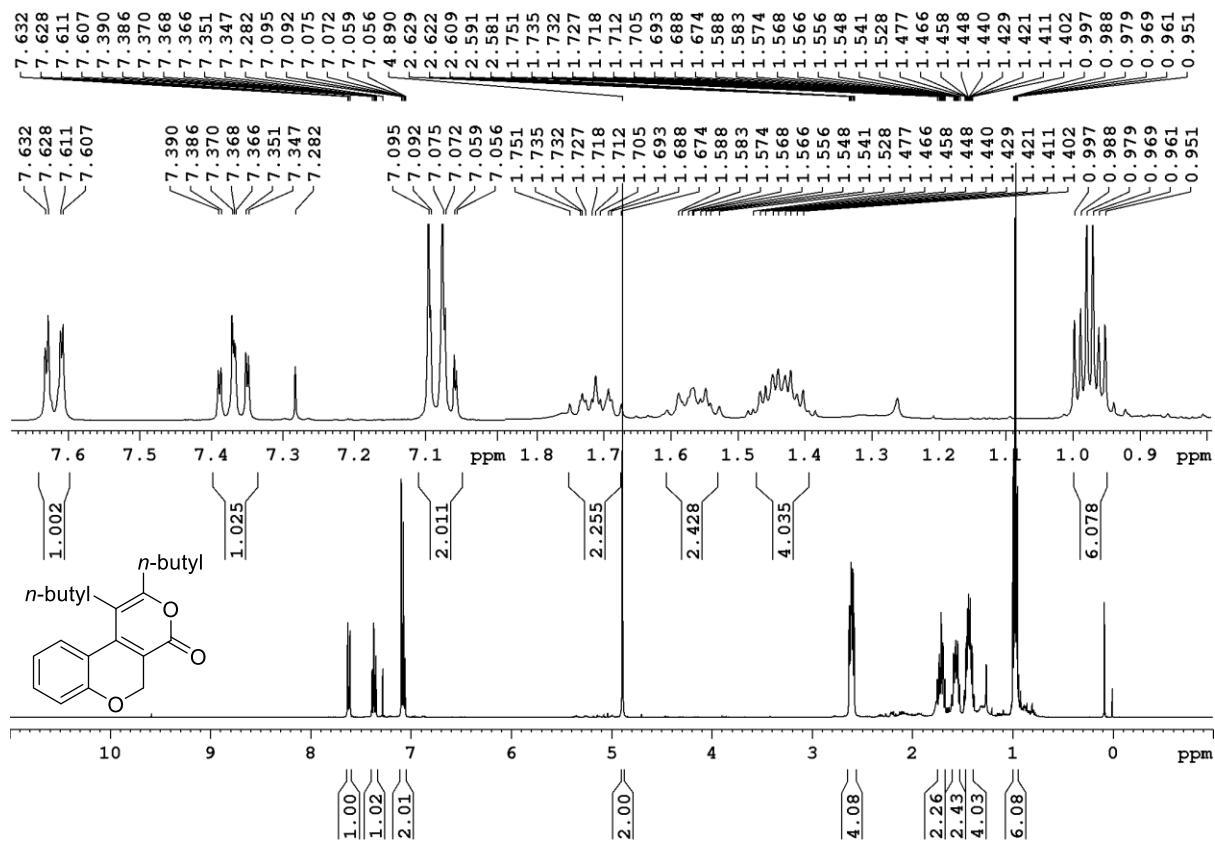

**Figure S28.**  $^1\text{H NMR}$  spectrum of compound **5aj**

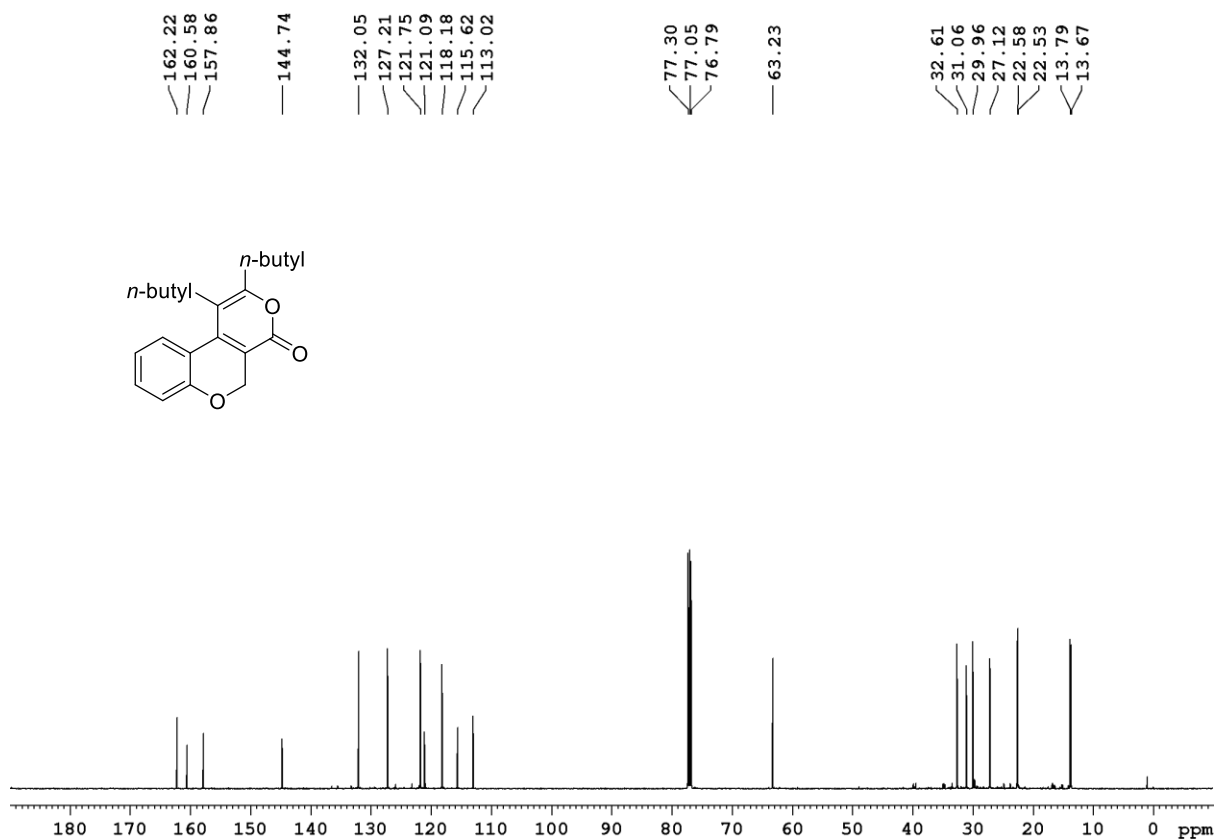

**Figure S29.**  $^{13}\text{C}\{^1\text{H}\}$  NMR spectrum of compound **5aj**



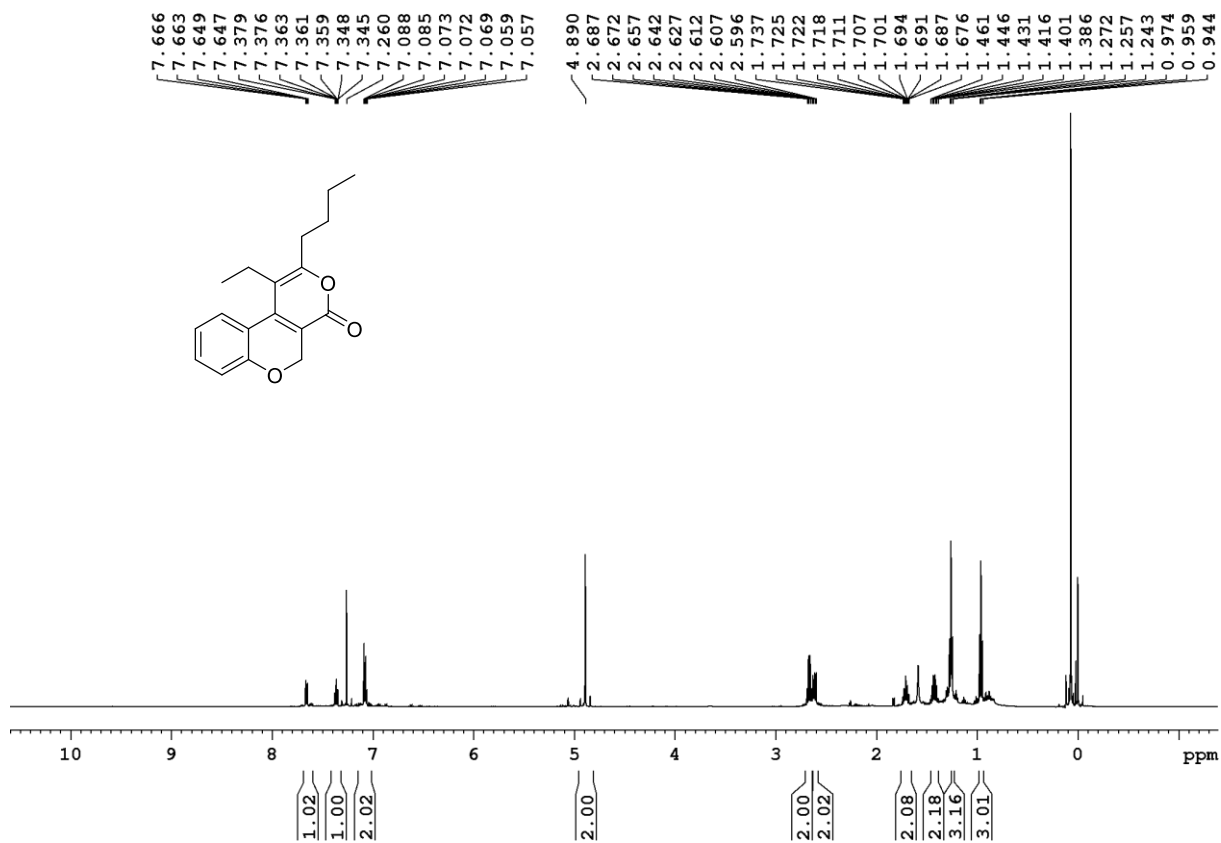

**Figure S30.**  $^1\text{H}$  NMR spectrum of compound **5ak** (isomeric purity 95%)

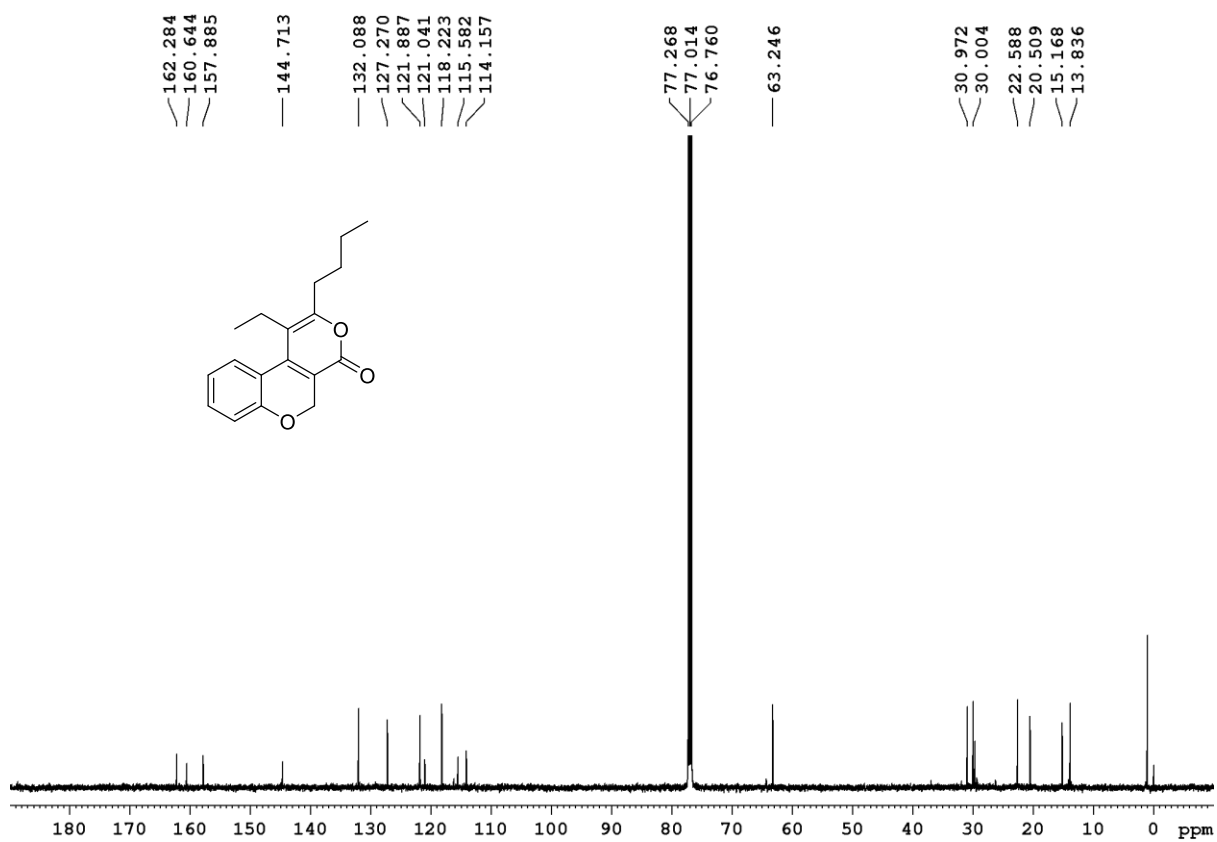

**Figure S31.**  $^{13}\text{C}\{^1\text{H}\}$  NMR spectrum of compound **5ak**

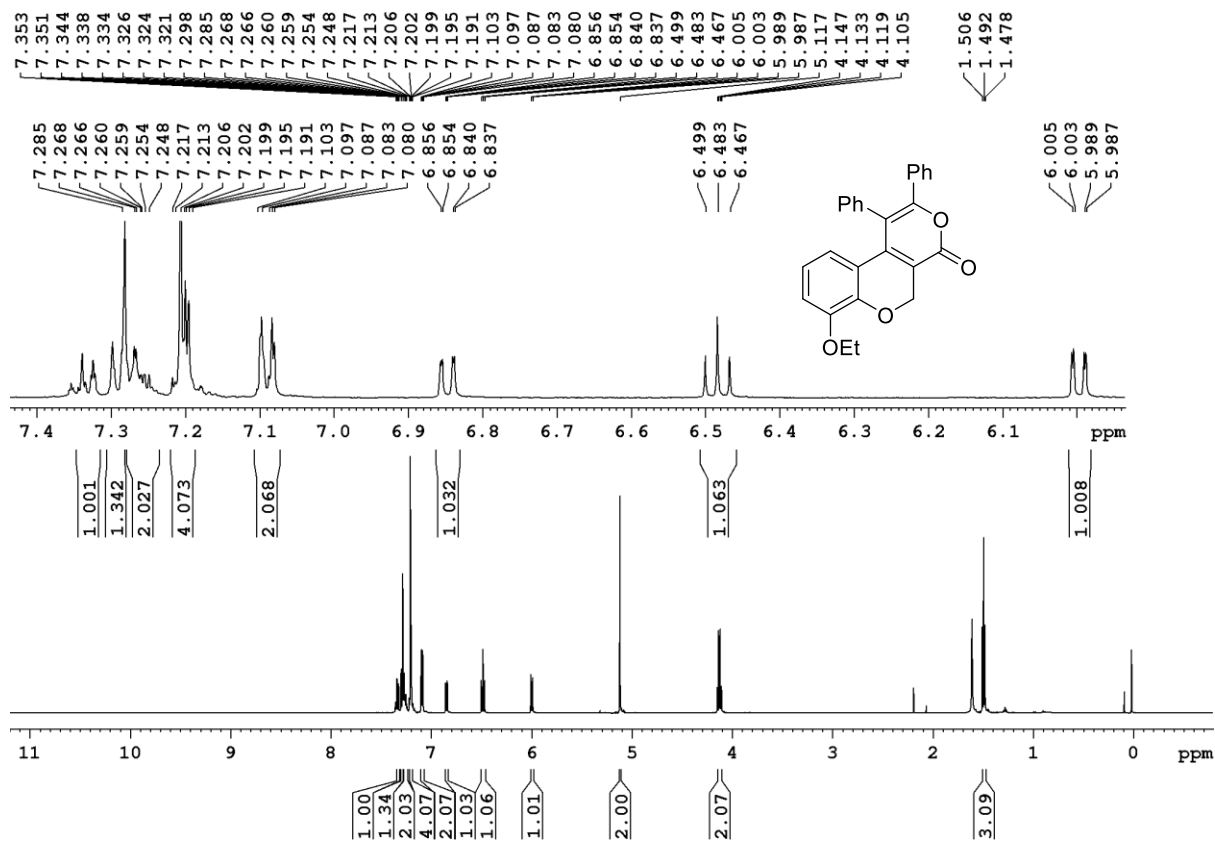

Figure S32.  $^1\text{H NMR}$  spectrum of compound 5ba

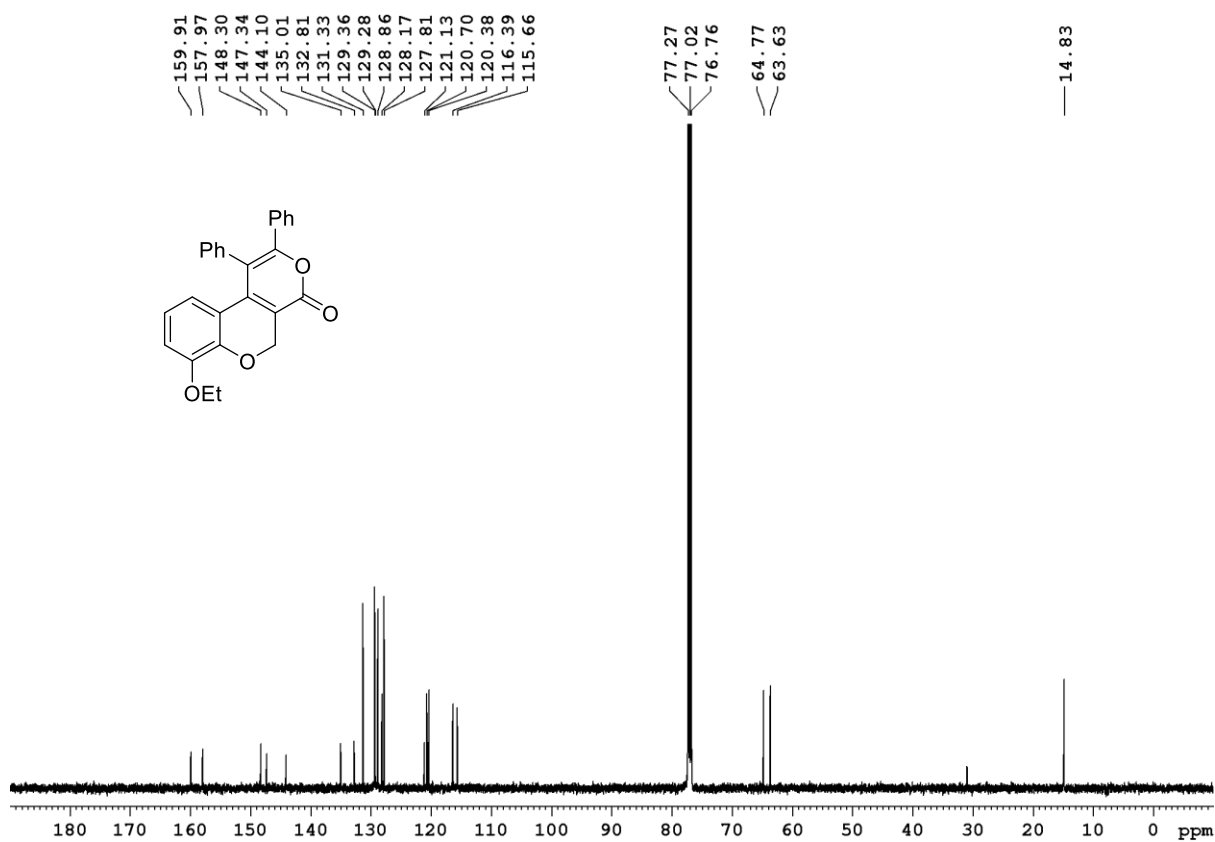

Figure S33.  $^{13}\text{C}\{^1\text{H}\}$  NMR spectrum of compound 5ba

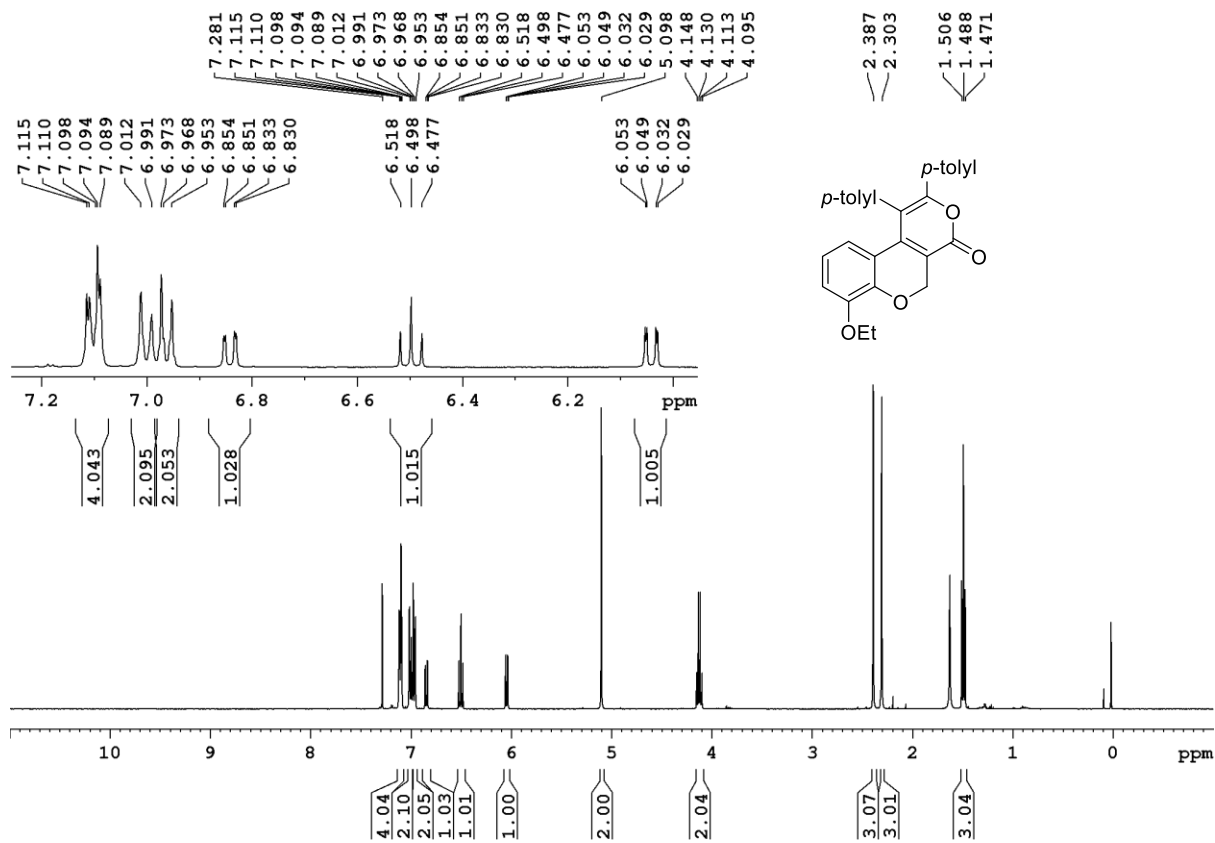

Figure S34. <sup>1</sup>H NMR spectrum of compound **5bb**

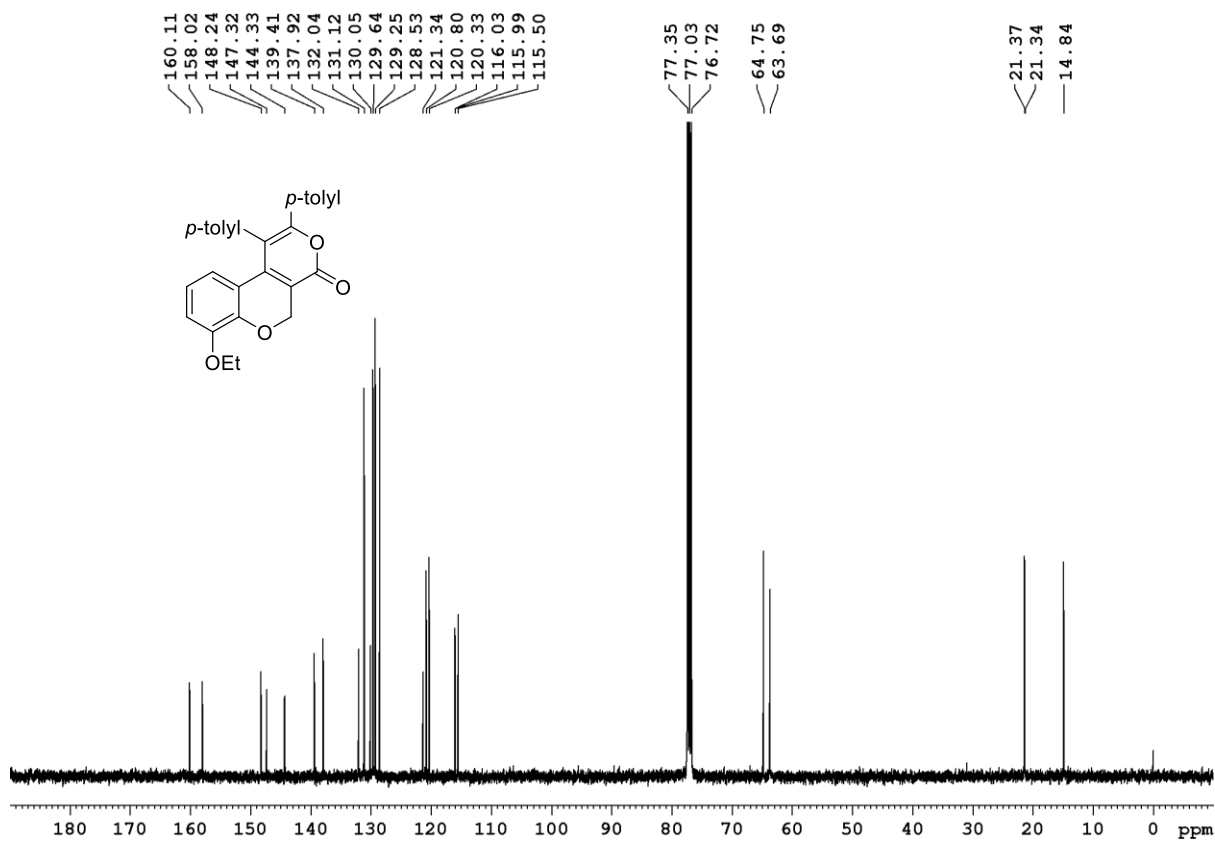

Figure S35. <sup>13</sup>C{<sup>1</sup>H} NMR spectrum of compound **5bb**

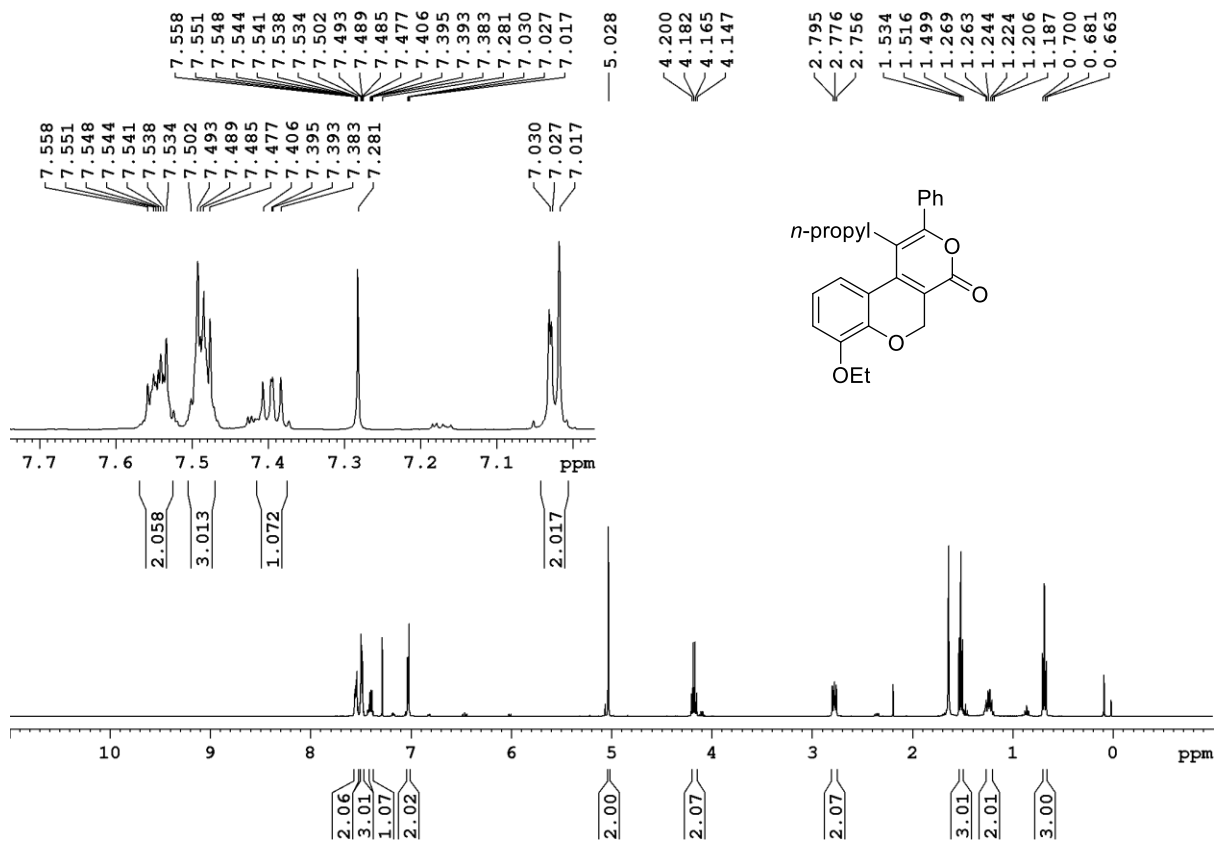

**Figure S36.** <sup>1</sup>H NMR spectrum of compound **5bg**

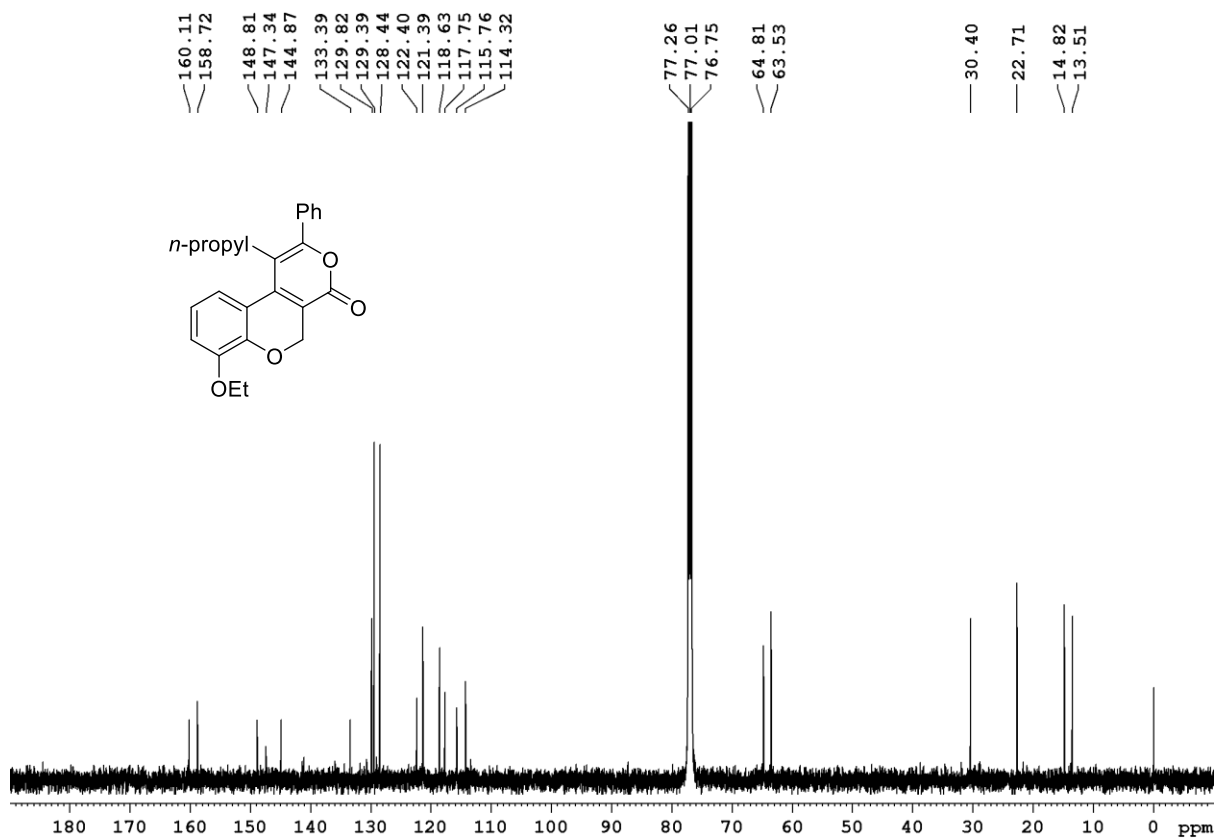

**Figure S37.** <sup>13</sup>C{<sup>1</sup>H} NMR spectrum of compound **5bg**

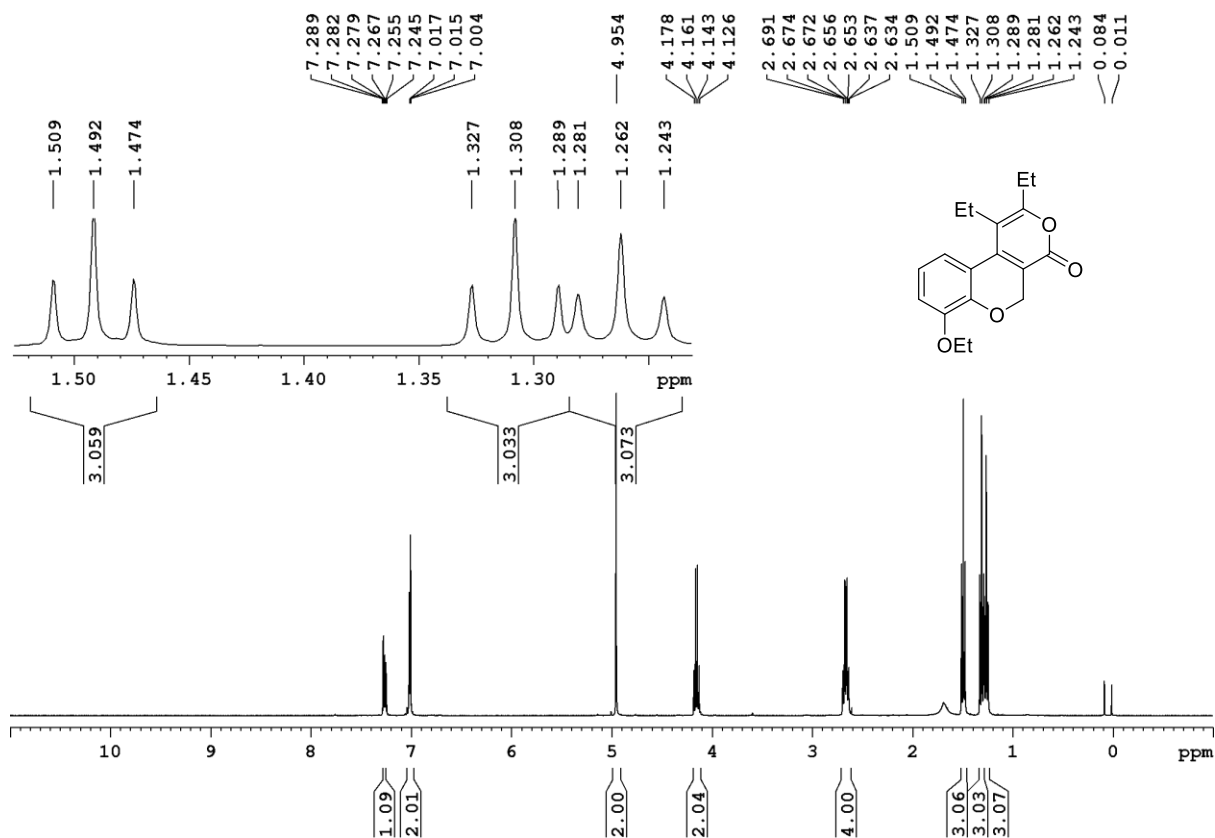

Figure S38.  $^1\text{H}$  NMR spectrum of compound 5bh

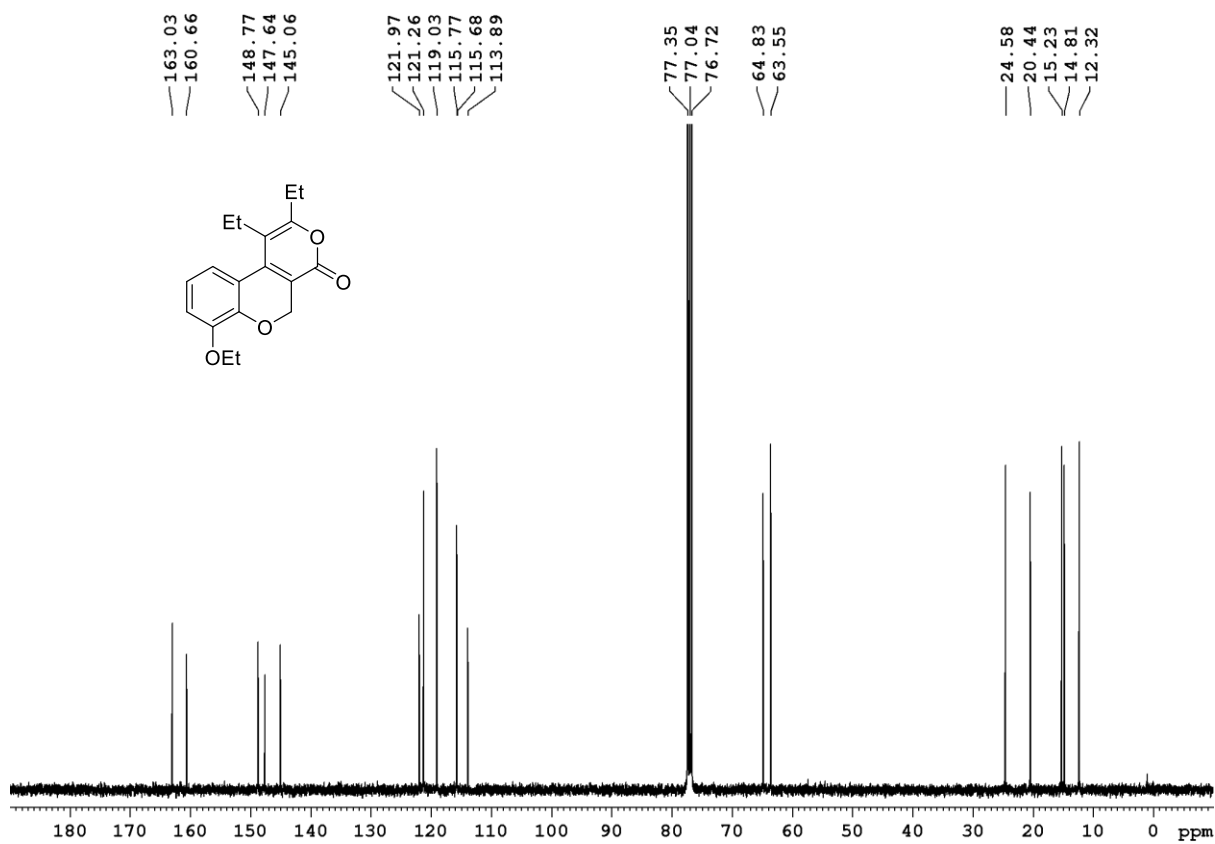

Figure S39.  $^{13}\text{C}\{^1\text{H}\}$  NMR spectrum of compound 5bh

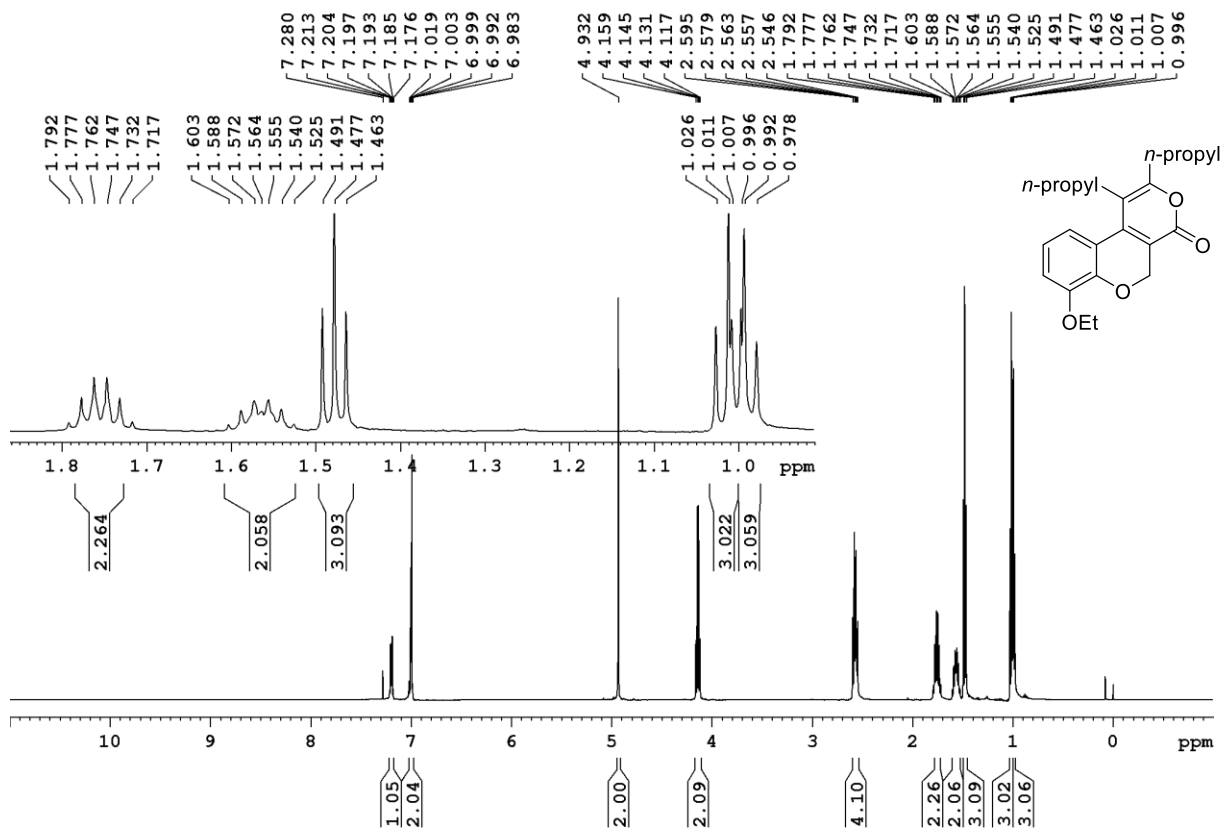

Figure S40. <sup>1</sup>H NMR spectrum of compound **5bi**

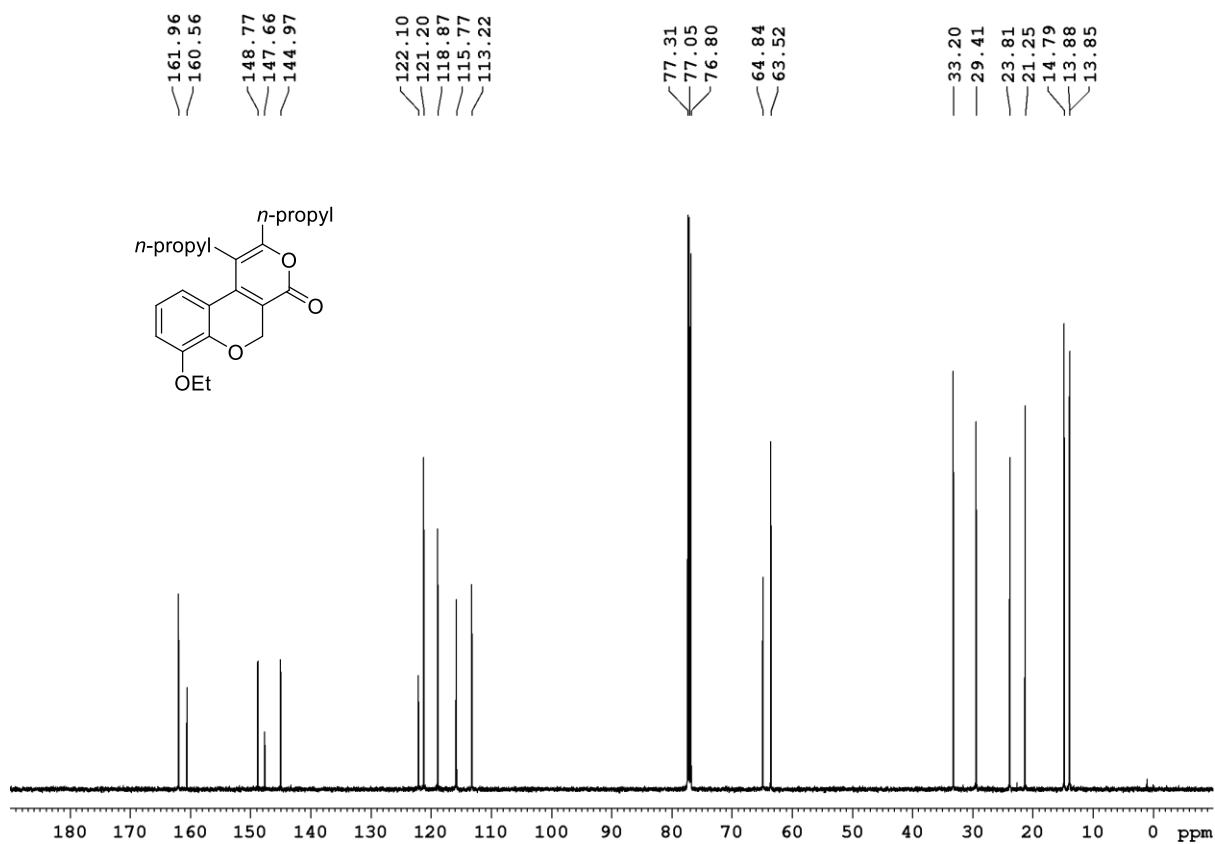

Figure S41. <sup>13</sup>C{<sup>1</sup>H} NMR spectrum of compound **5bi**

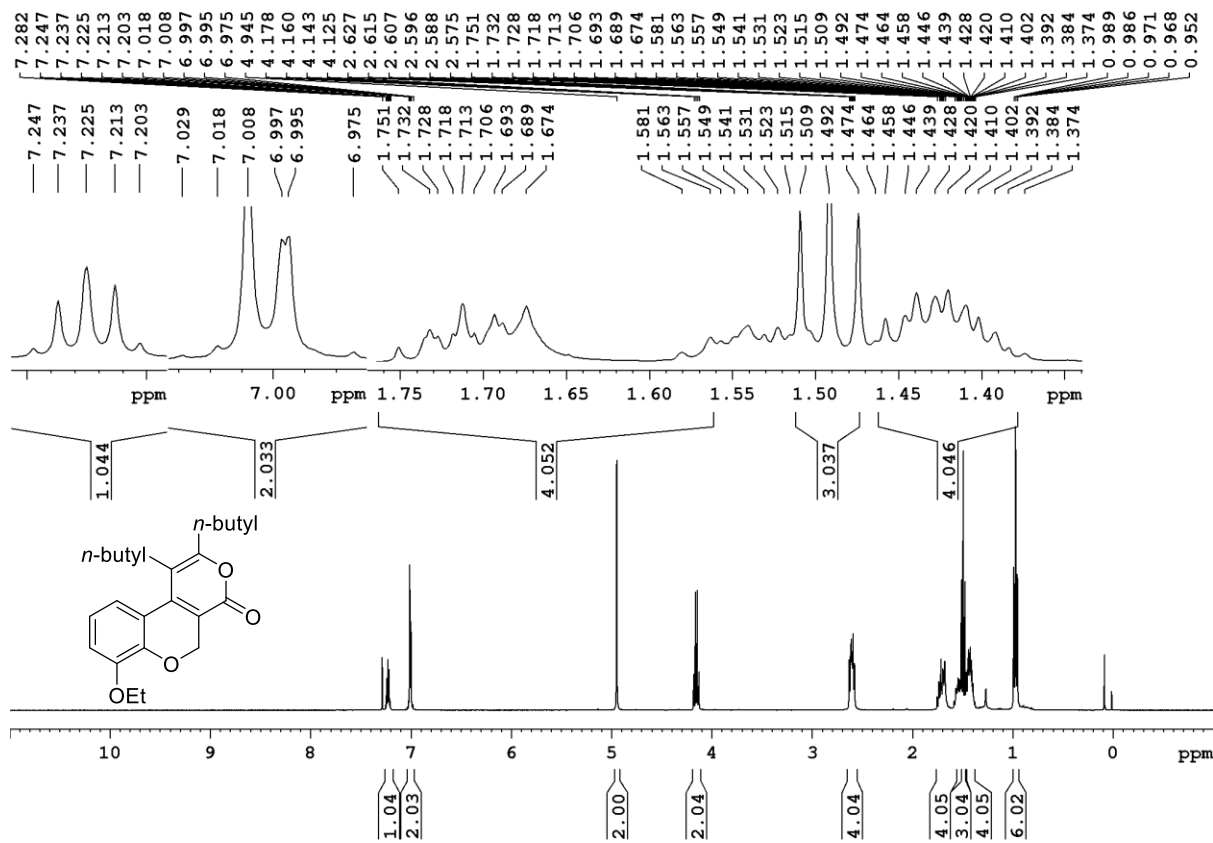

**Figure S42.  $^1\text{H}$  NMR spectrum of compound **5bj****

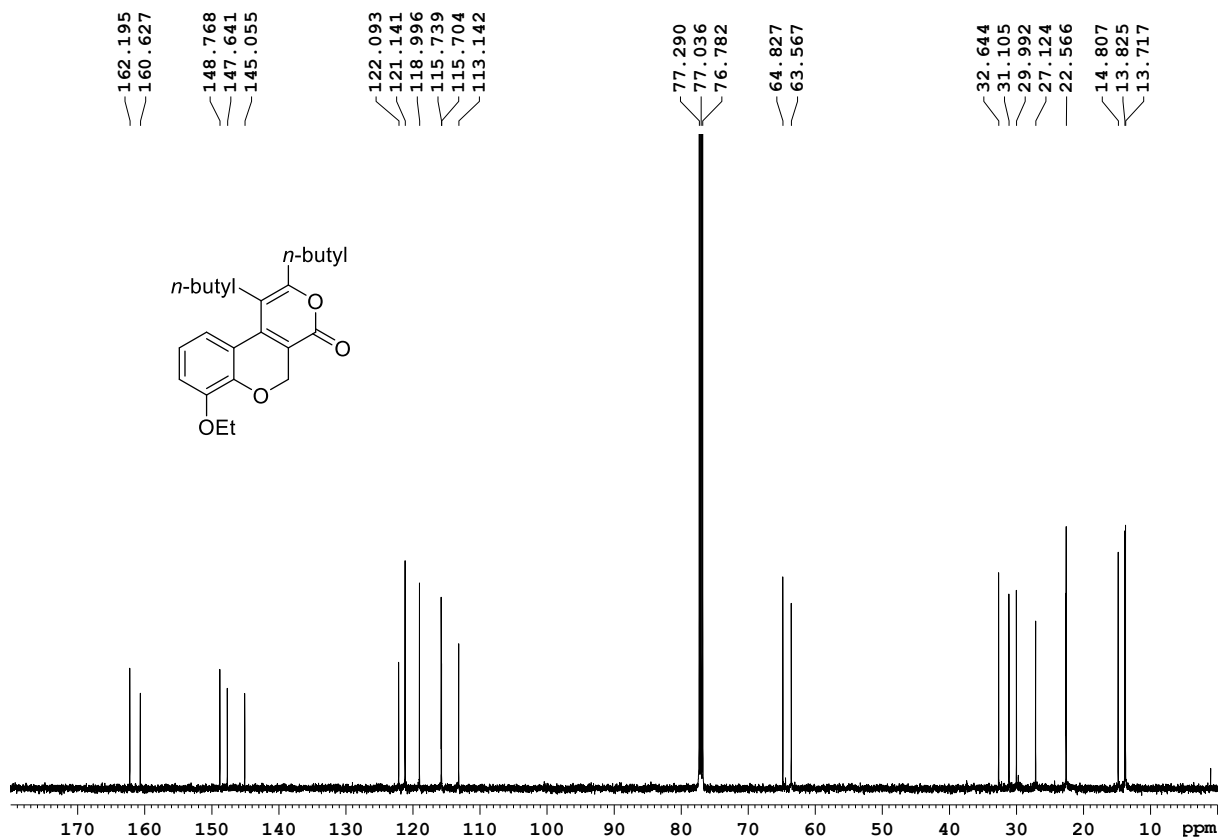

**Figure S43.  $^{13}\text{C}\{^1\text{H}\}$  NMR spectrum of compound **5bj****

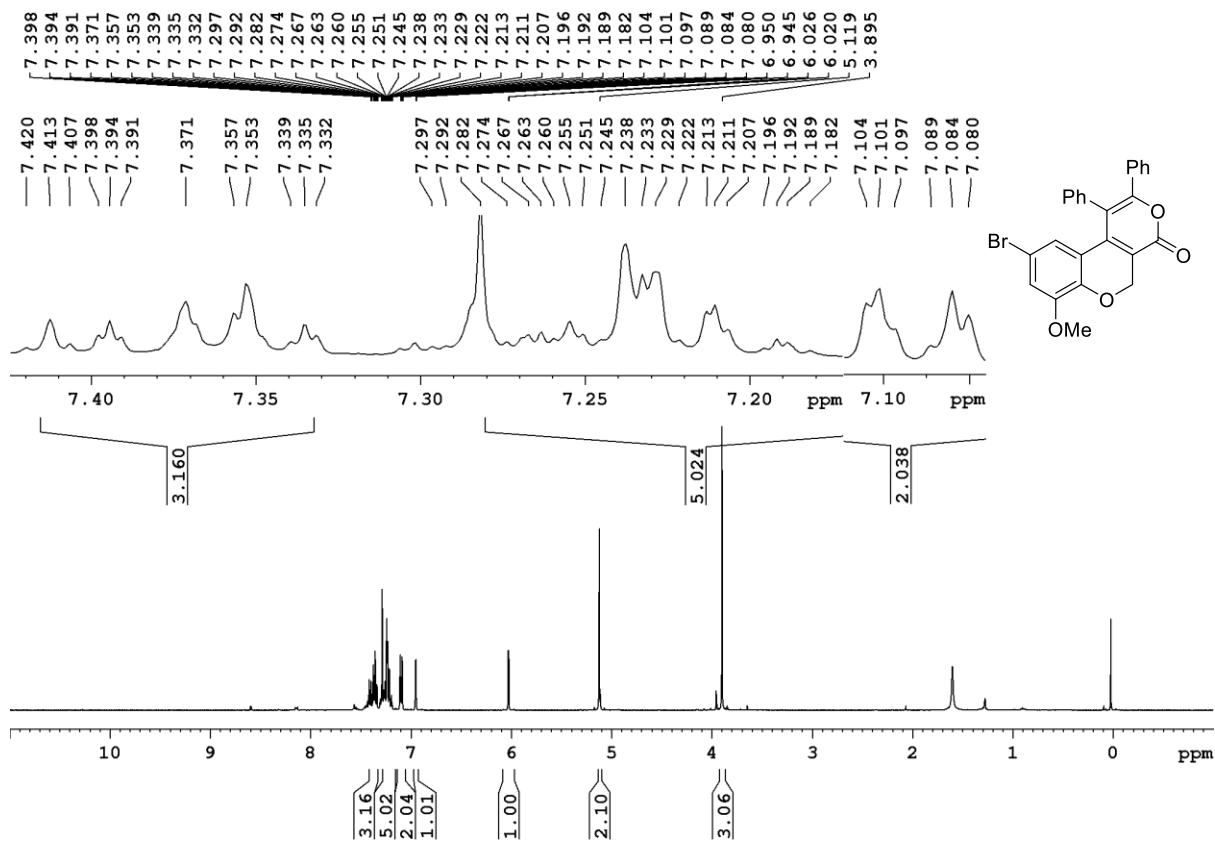

Figure S44.  $^1\text{H NMR}$  spectrum of compound 5ca

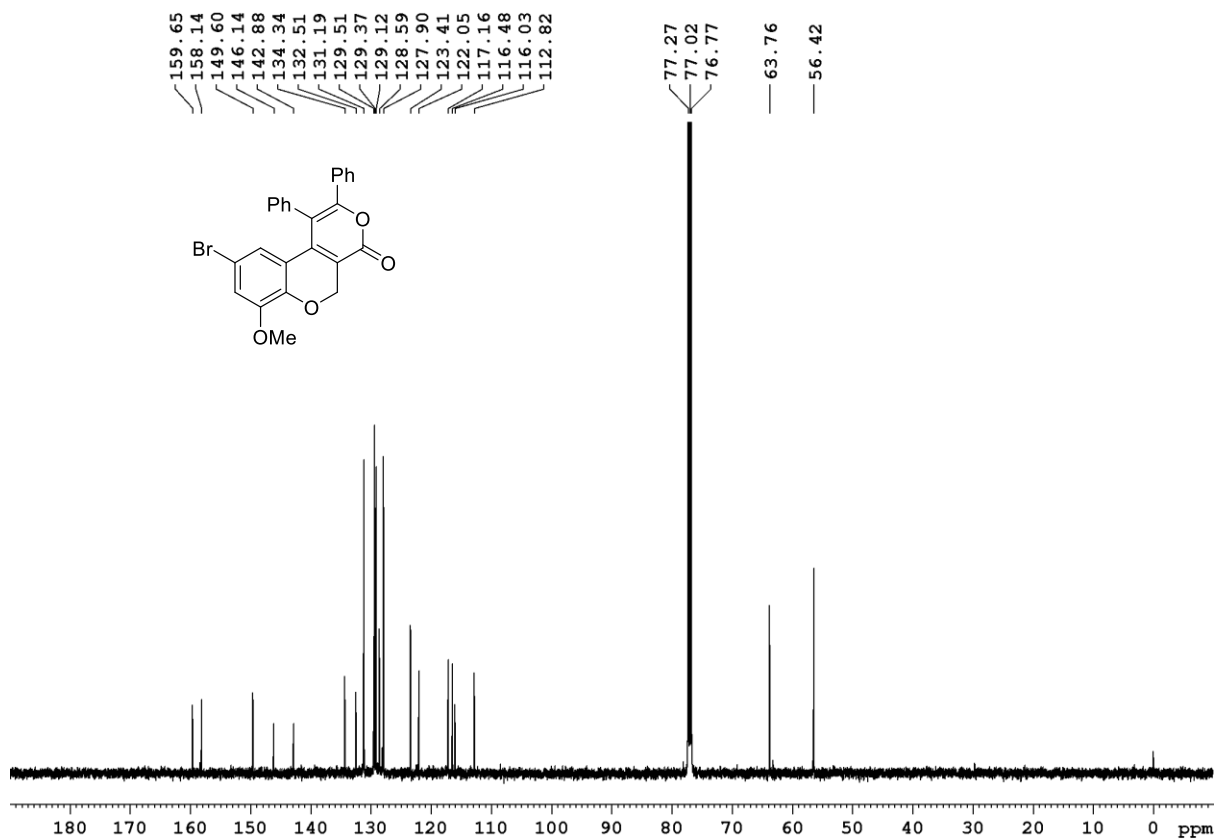

Figure S45.  $^{13}\text{C}\{^1\text{H}\}$  NMR spectrum of compound 5ca



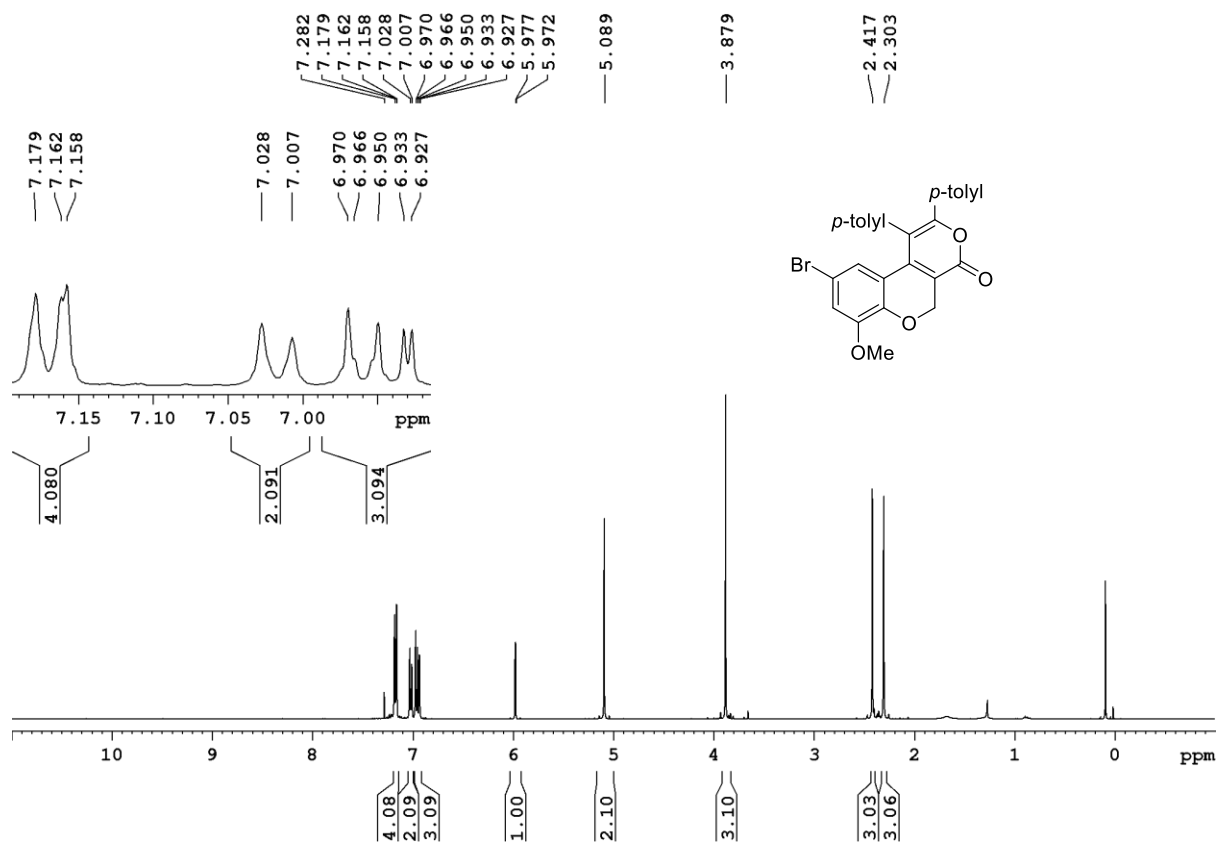

**Figure S46.**  $^1\text{H}$  NMR spectrum of compound **5cb**

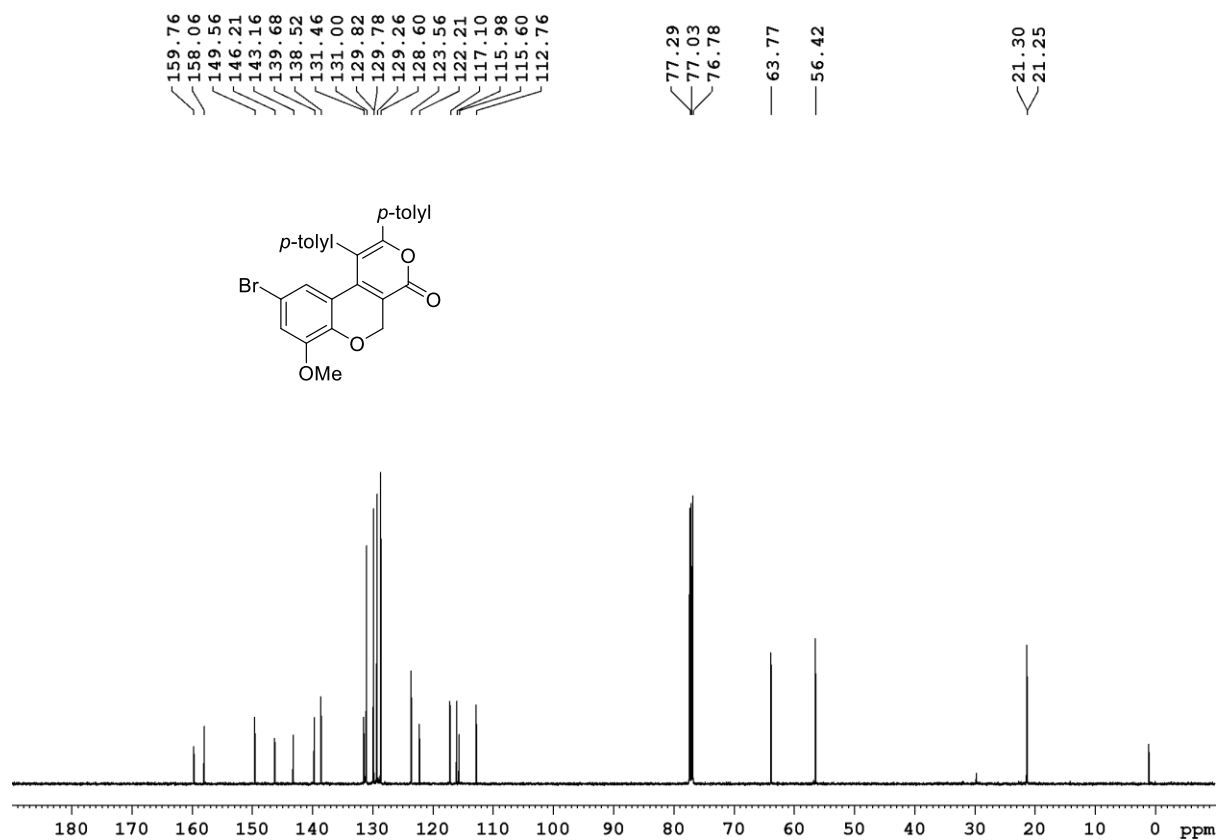

**Figure S47.**  $^{13}\text{C}\{^1\text{H}\}$  NMR spectrum of compound **5cb**

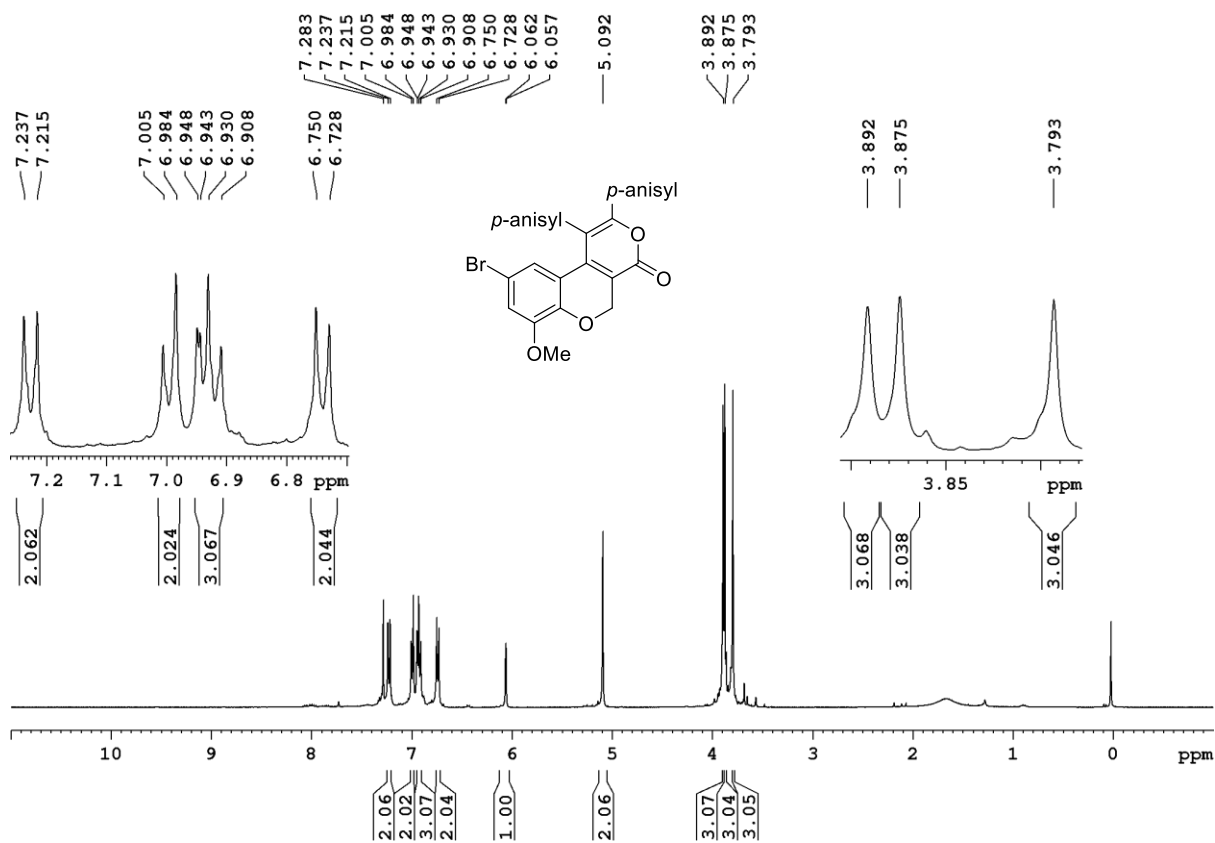

Figure S48. <sup>1</sup>H NMR spectrum of compound 5cc

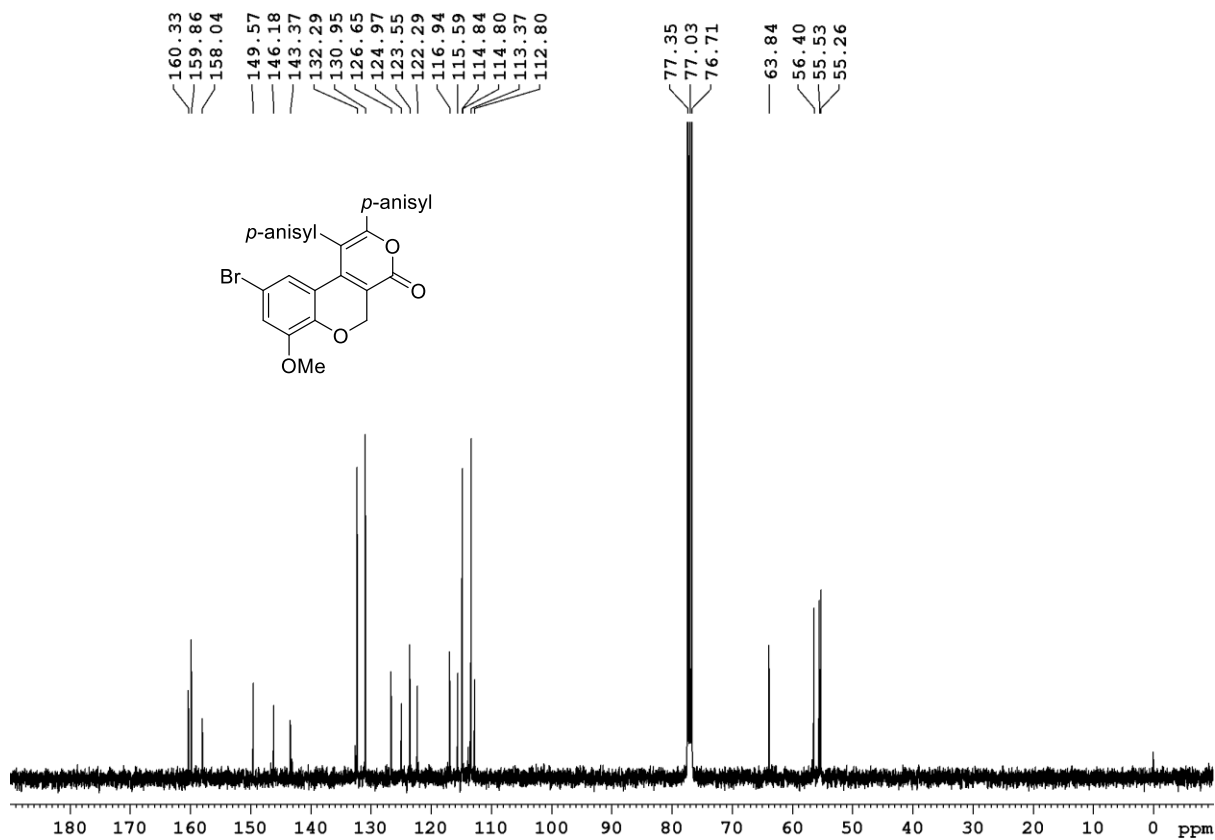

Figure S49. <sup>13</sup>C{<sup>1</sup>H} NMR spectrum of compound 5cc

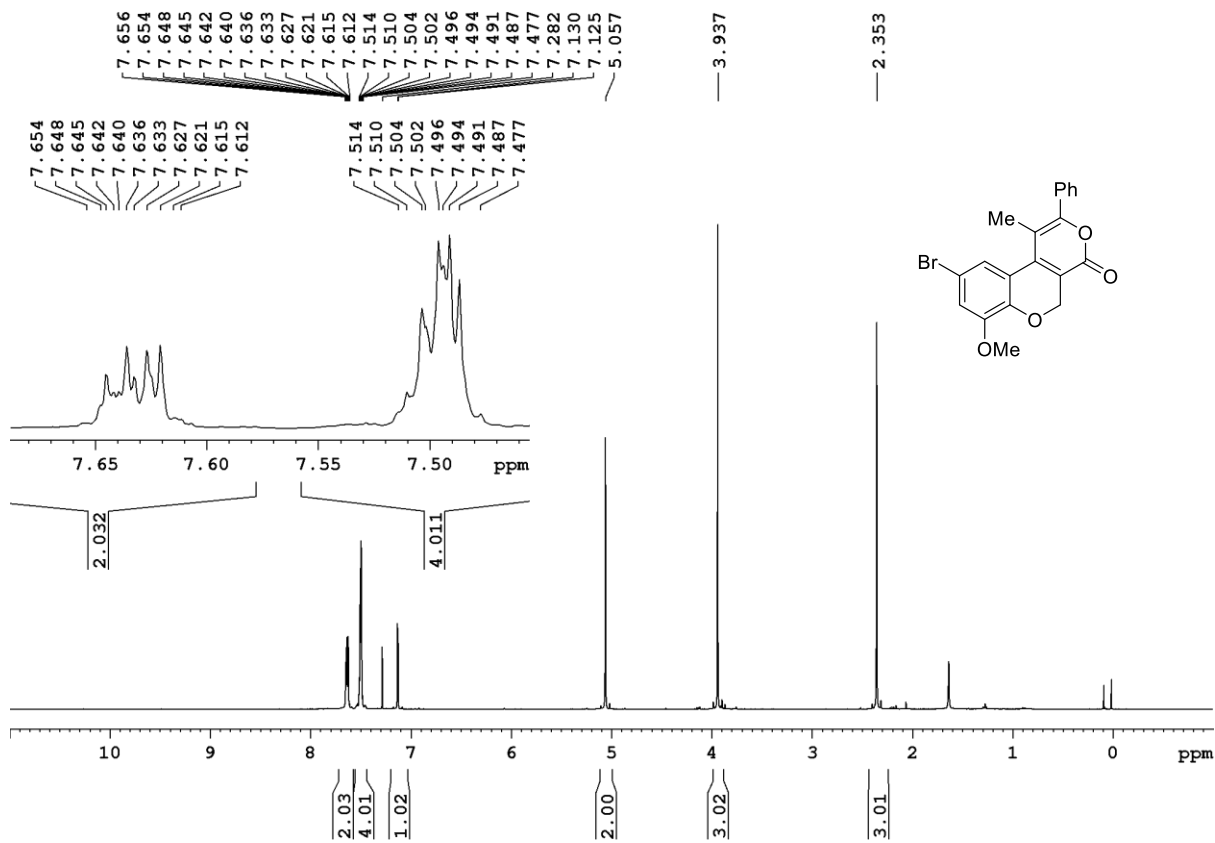

Figure S50.  $^1\text{H NMR}$  spectrum of compound 5ce

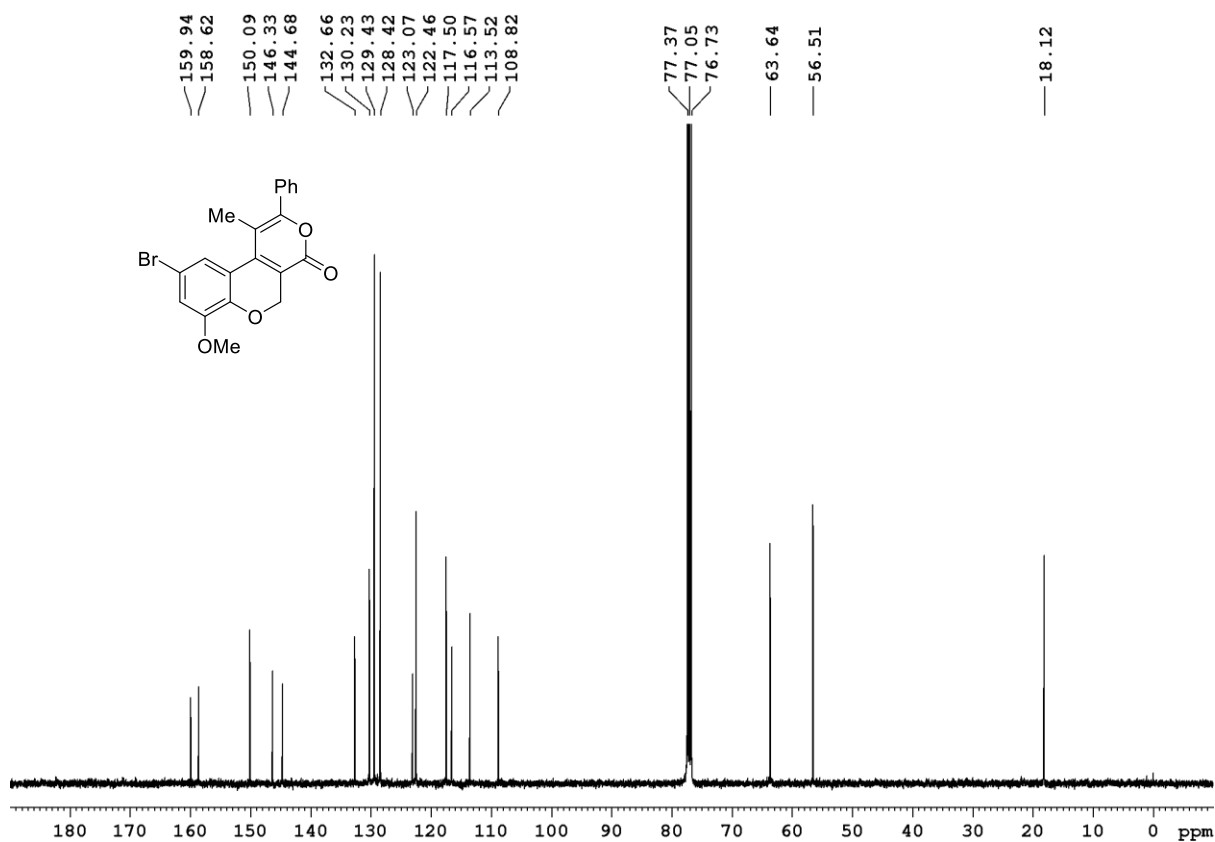

Figure S51.  $^{13}\text{C}\{^1\text{H}\}$  NMR spectrum of compound 5ce

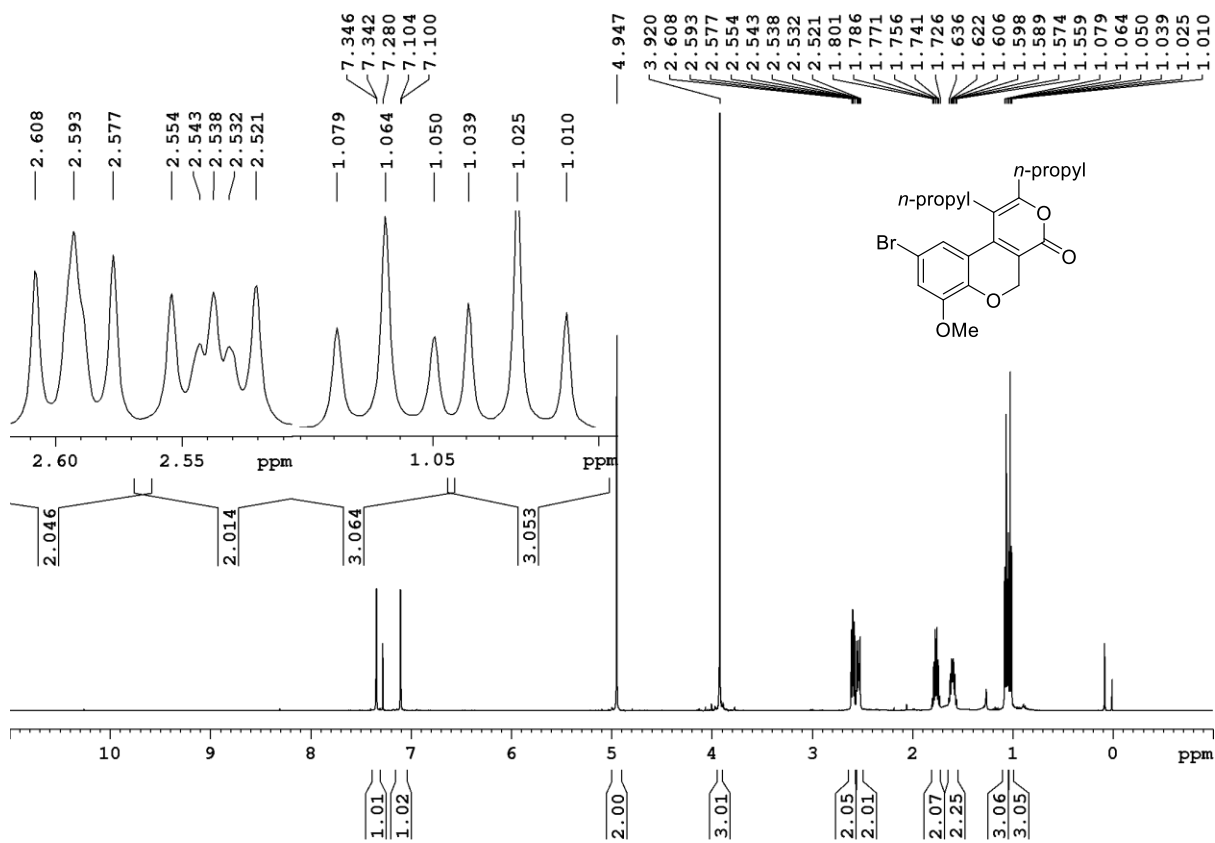

Figure S52.  $^1\text{H}$  NMR spectrum of compound 5ci

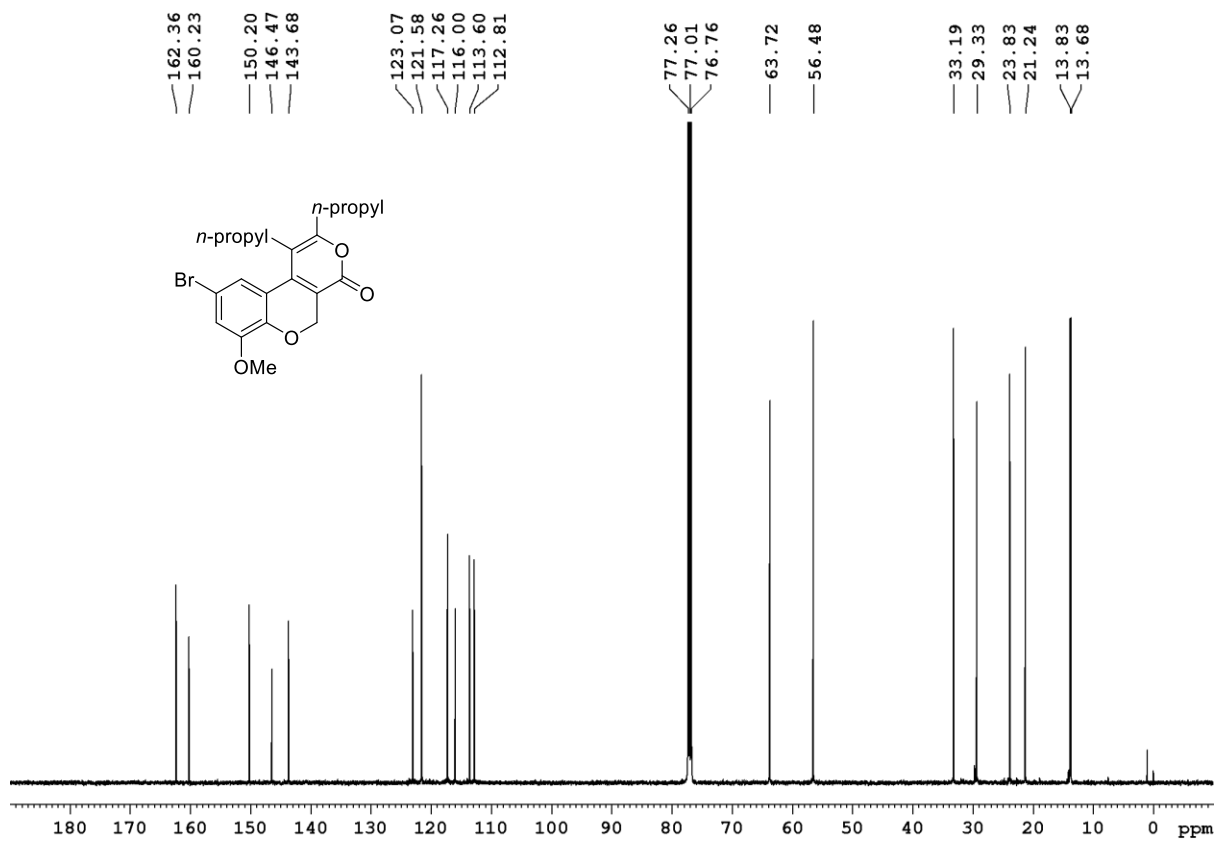

Figure S53.  $^{13}\text{C}\{^1\text{H}\}$  NMR spectrum of compound 5ci

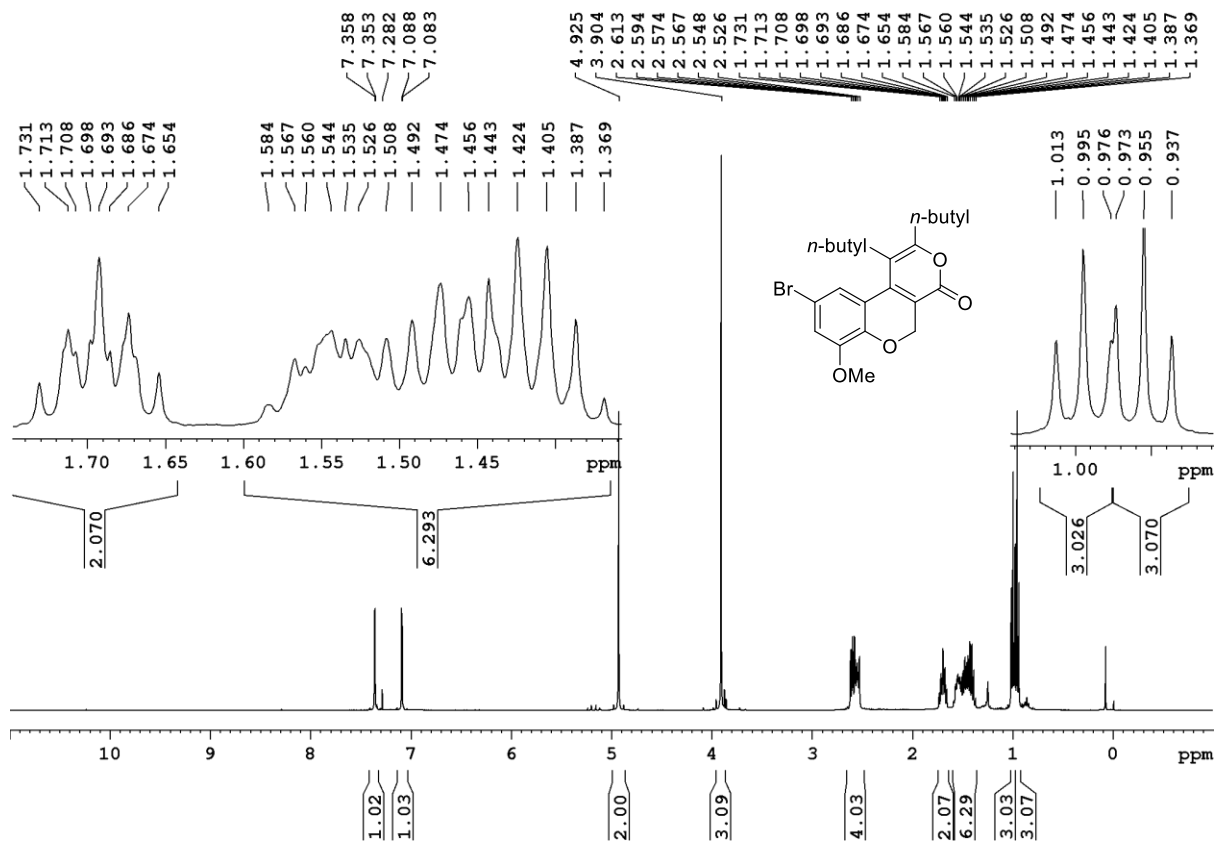

Figure S54.  $^1\text{H NMR}$  spectrum of compound 5cj

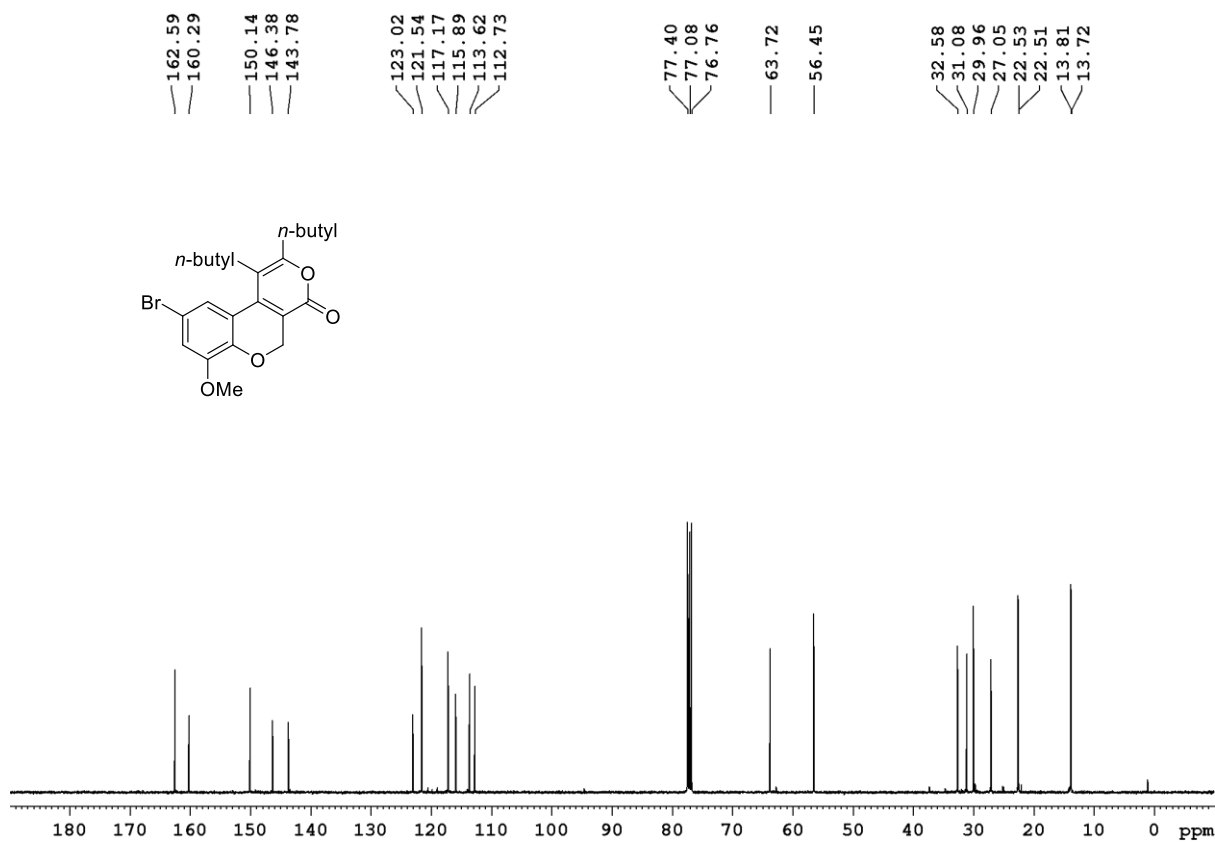

Figure S55.  $^{13}\text{C}\{^1\text{H}\}$  NMR spectrum of compound 5cj

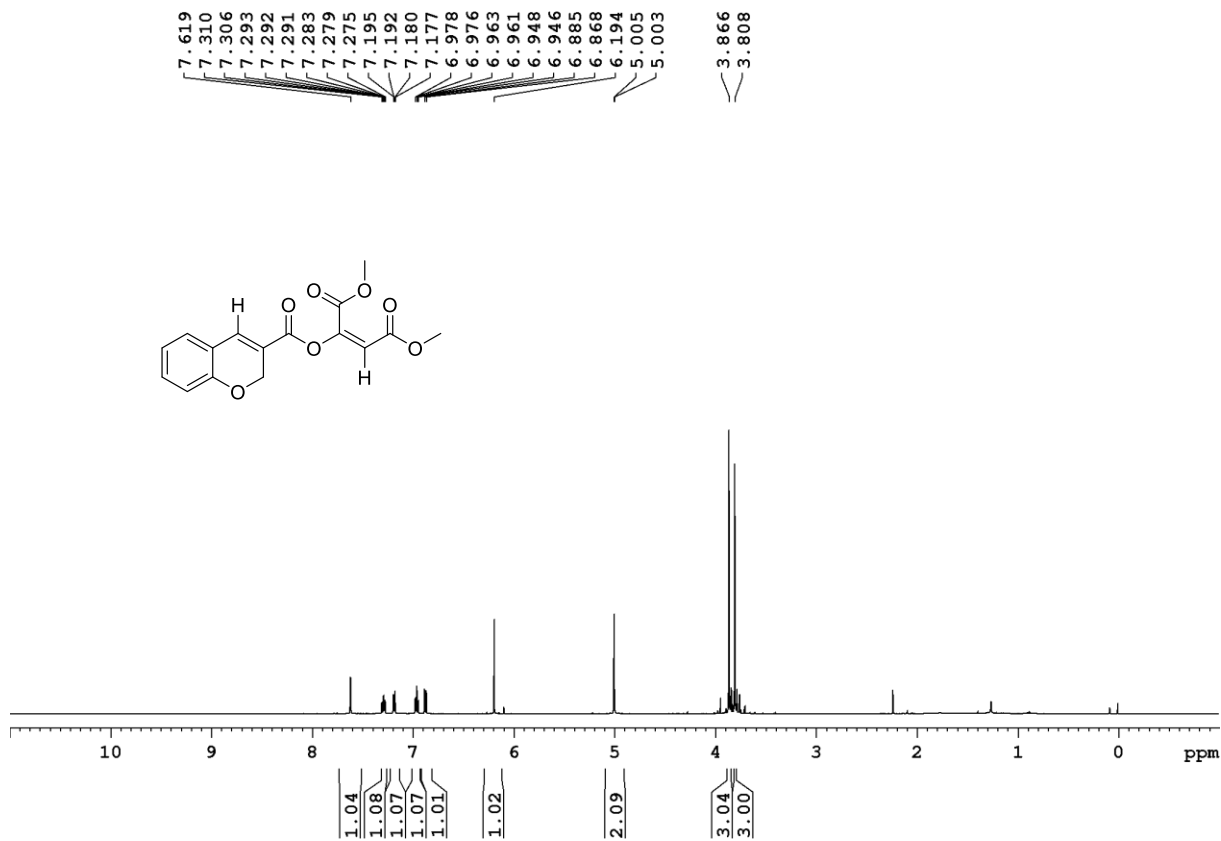

**Figure S56.**  $^1\text{H}$  NMR spectrum of compound 5'al

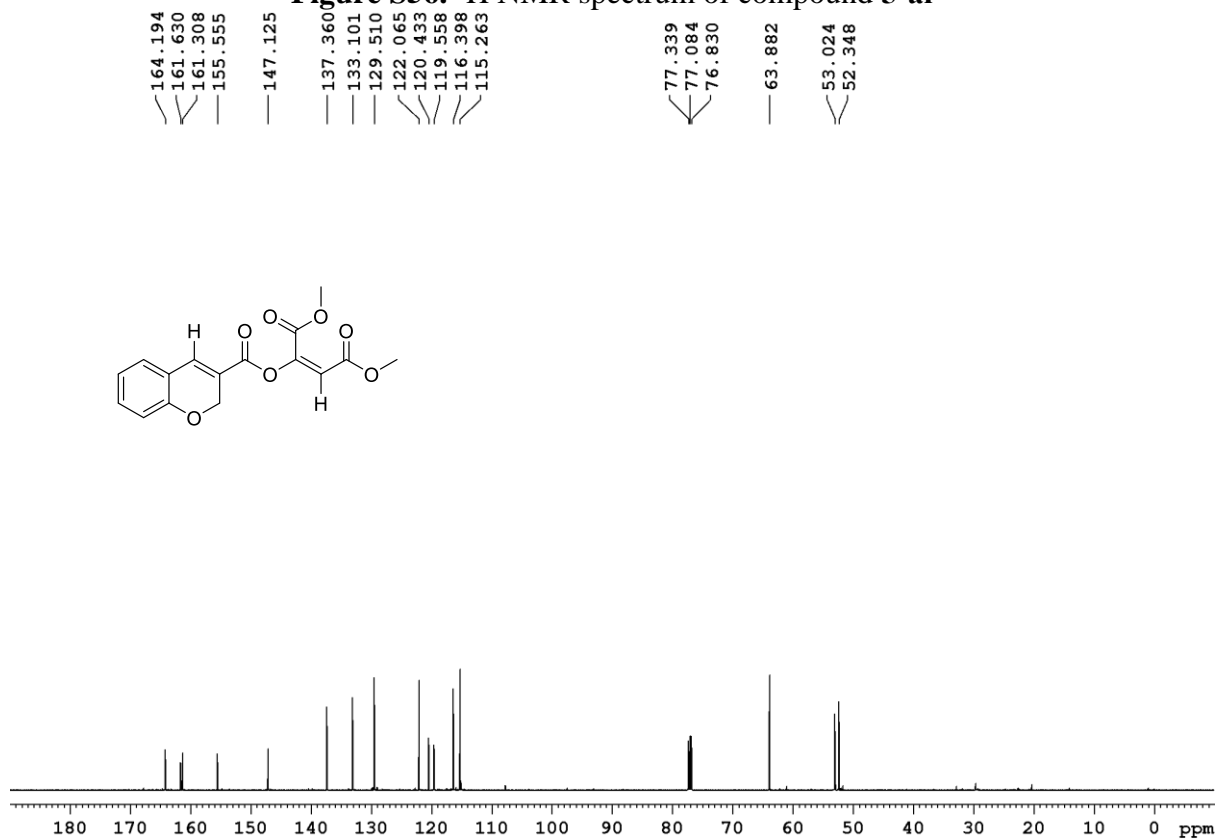

**Figure S57.**  $^{13}\text{C}\{^1\text{H}\}$  NMR spectrum of compound 5'al

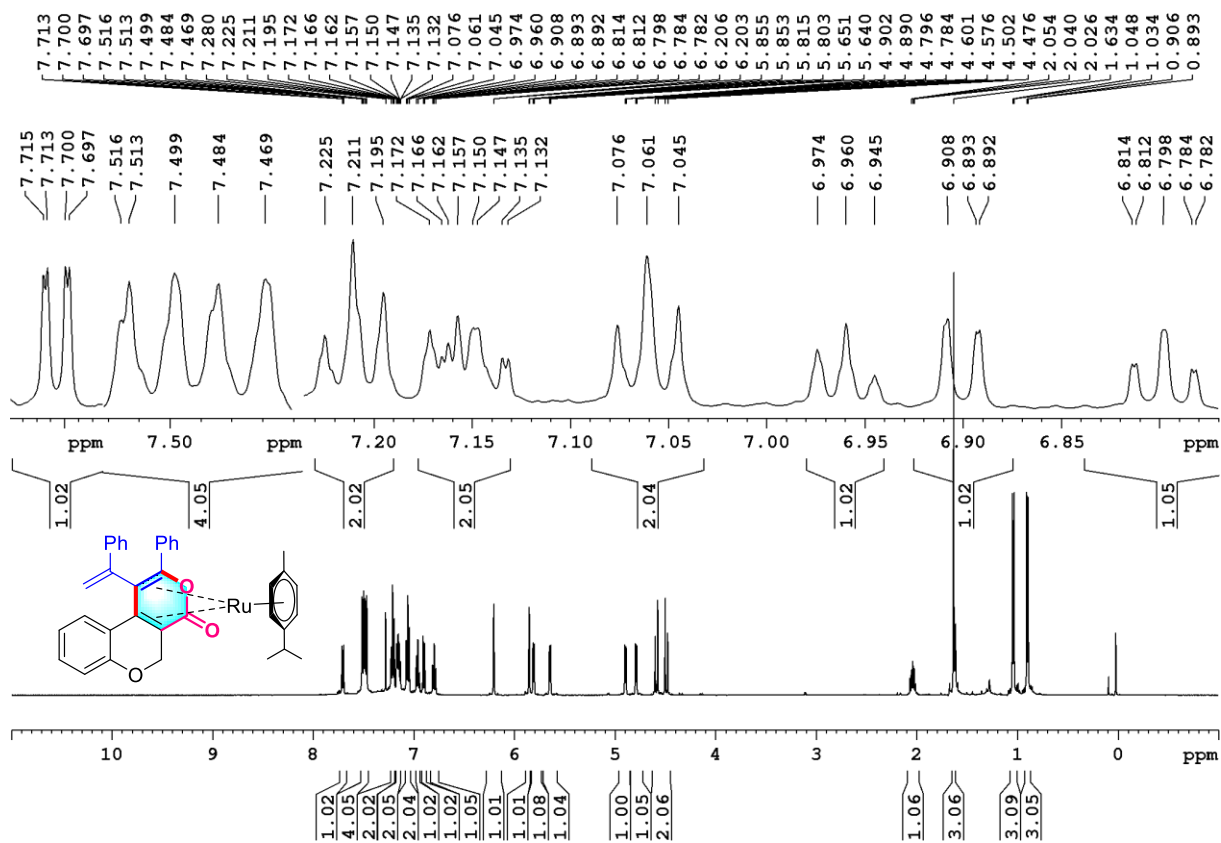

**Figure S58.  $^1\text{H}$  NMR spectrum of compound 6aa**

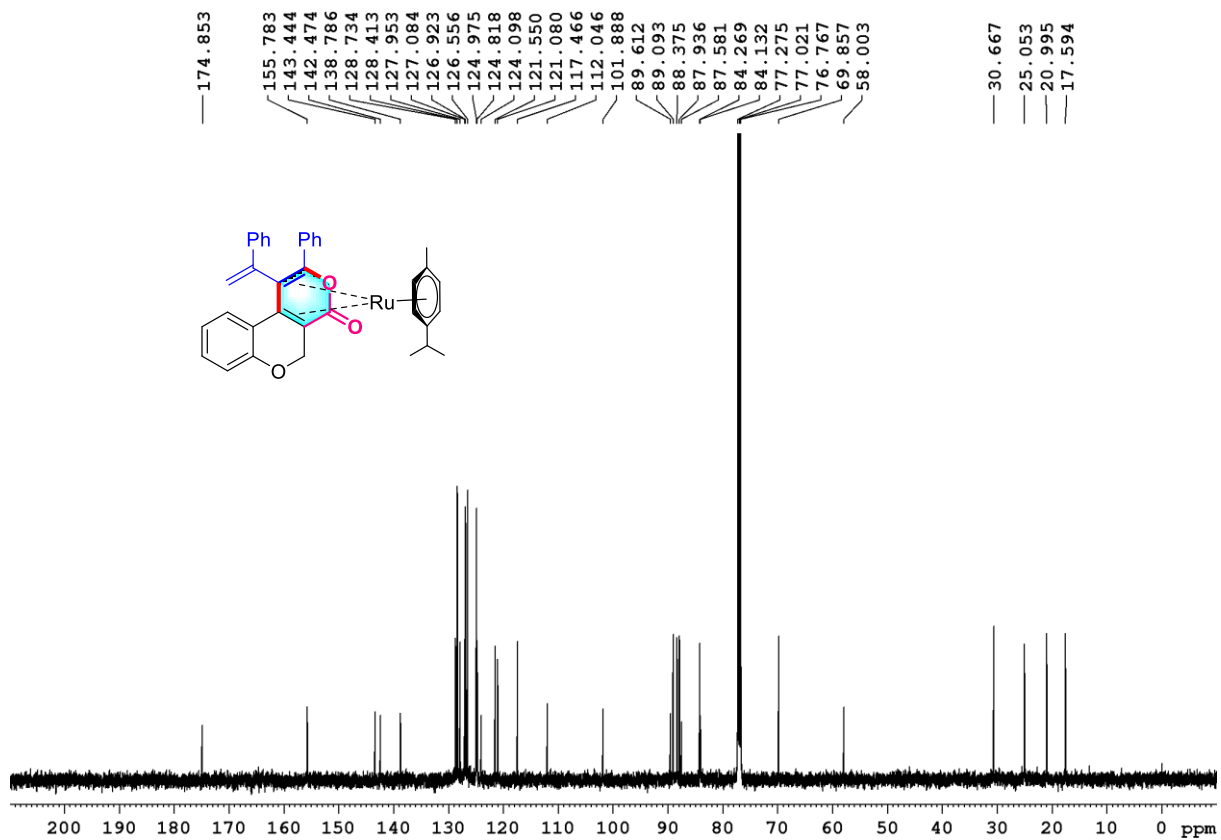

**Figure S59.  $^{13}\text{C}\{^1\text{H}\}$  NMR spectrum of compound 6aa**

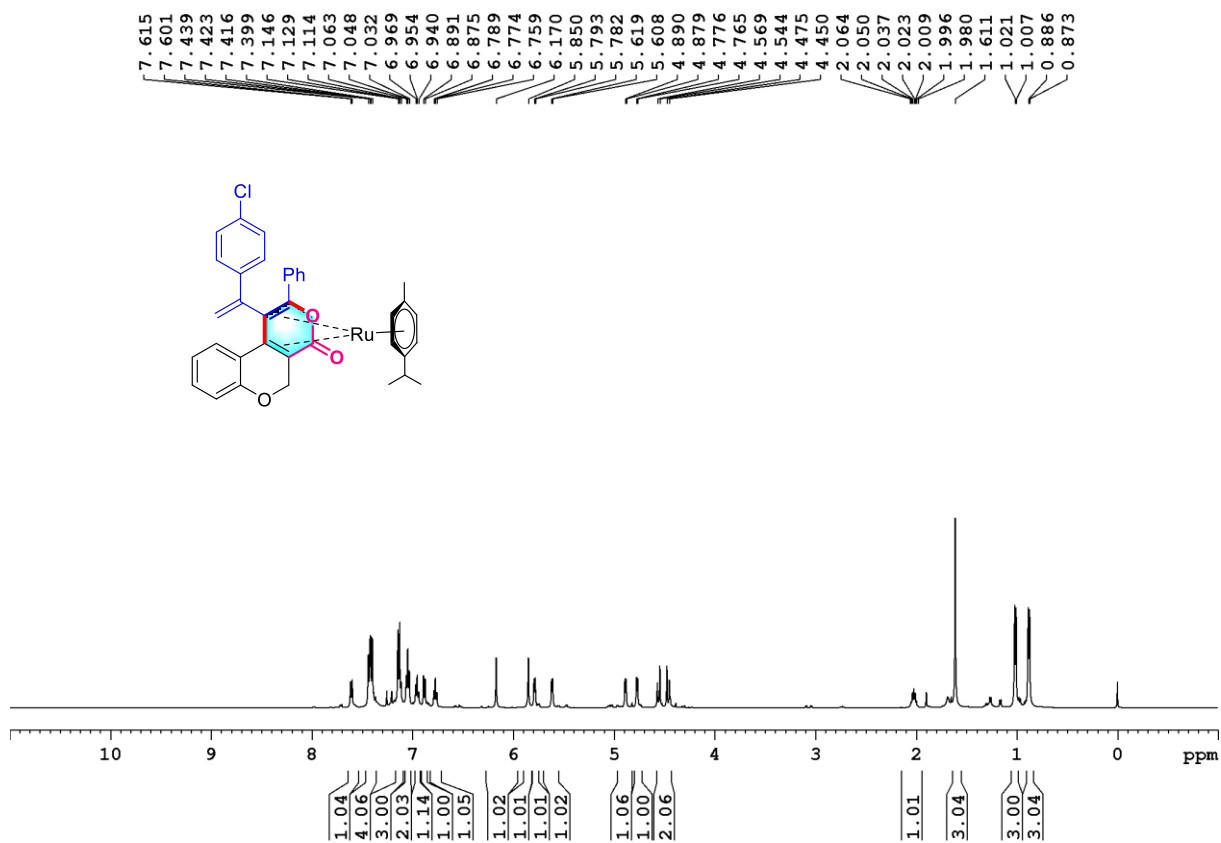

**Figure S60.**  $^1\text{H}$  NMR spectrum of compound **6ab**

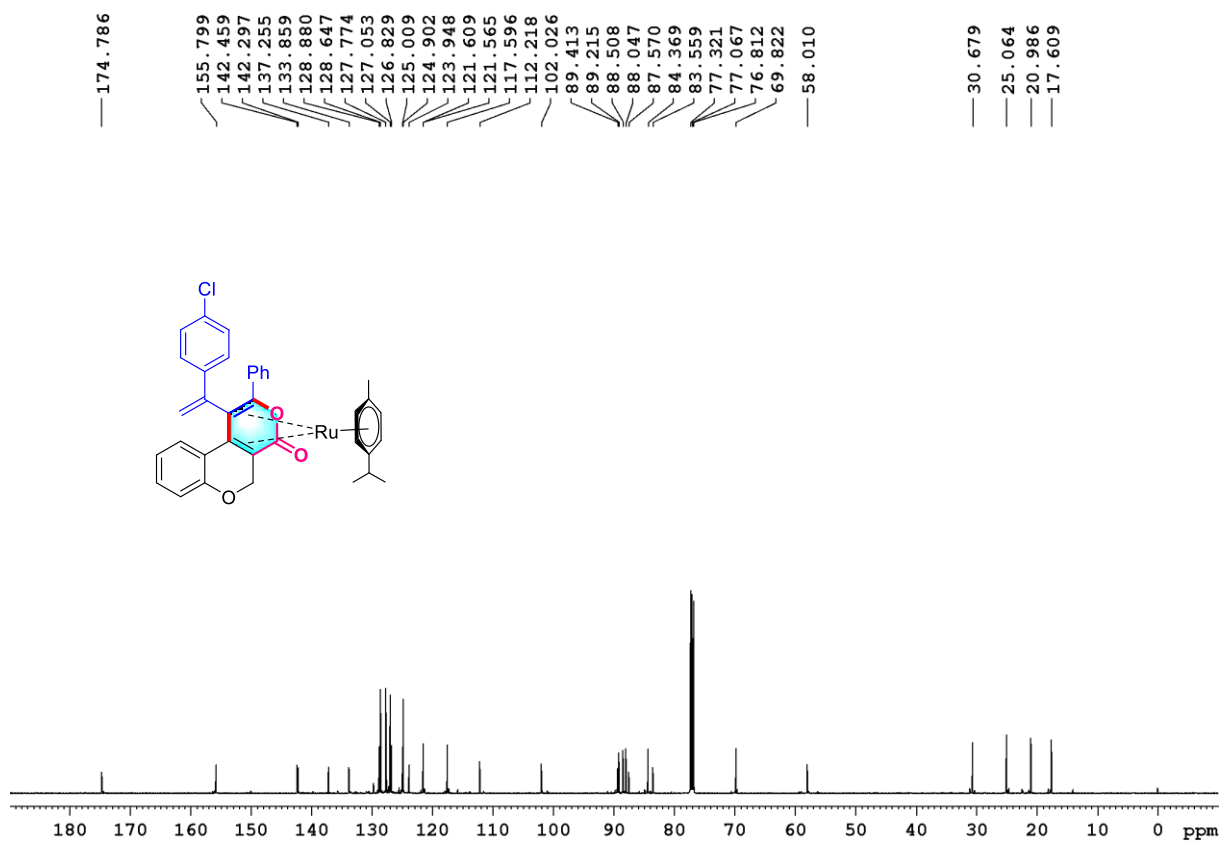

**Figure S61.**  $^{13}\text{C}\{^1\text{H}\}$  NMR spectrum of compound **6ab**



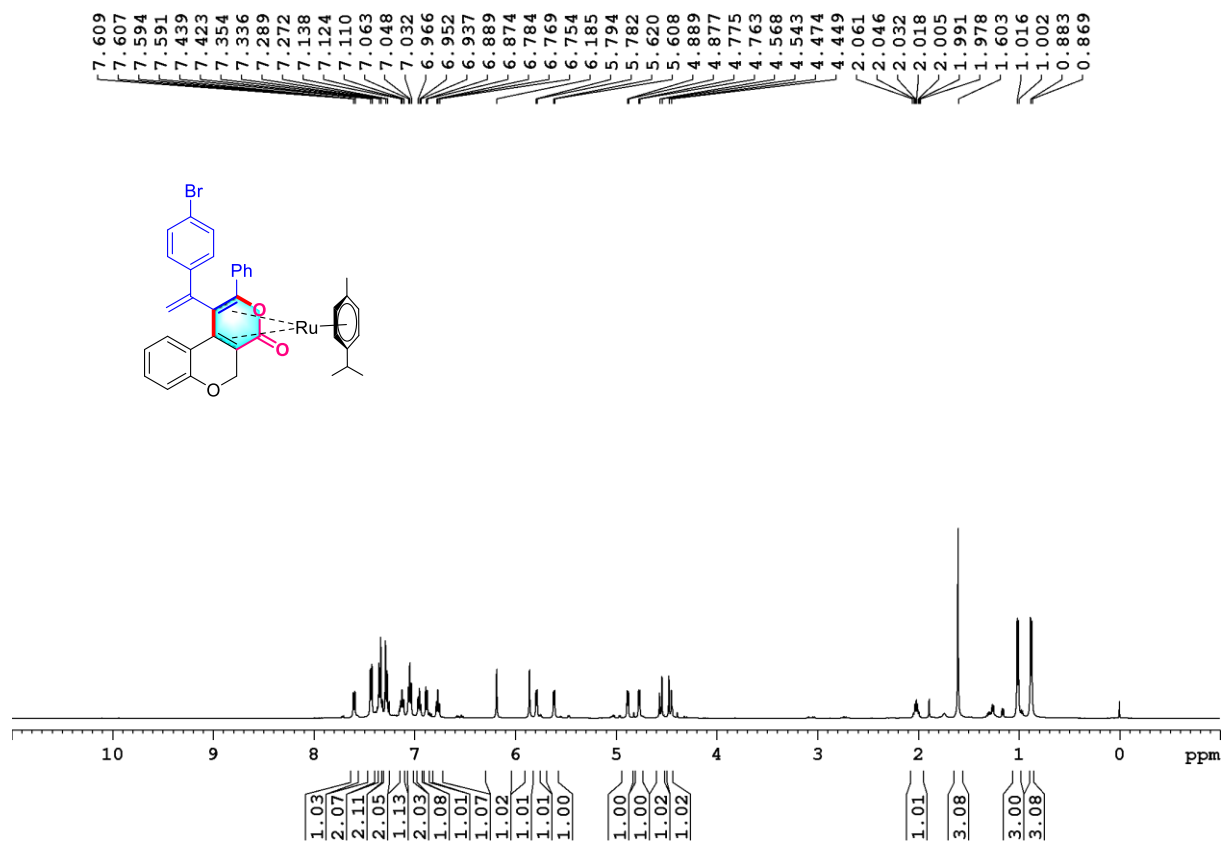

**Figure S62.**  $^1\text{H}$  NMR spectrum of compound **6ac**

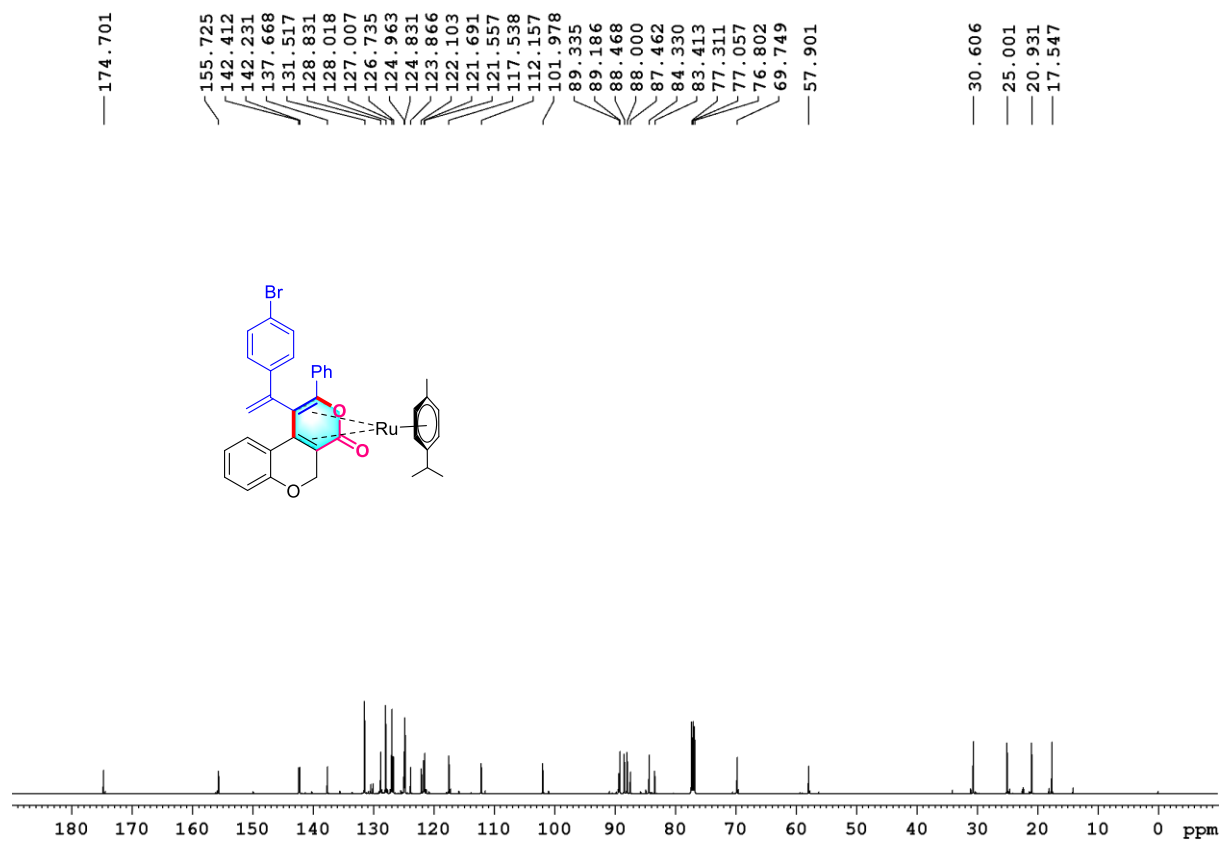

**Figure S63.**  $^{13}\text{C}\{^1\text{H}\}$  NMR spectrum of compound **6ac**

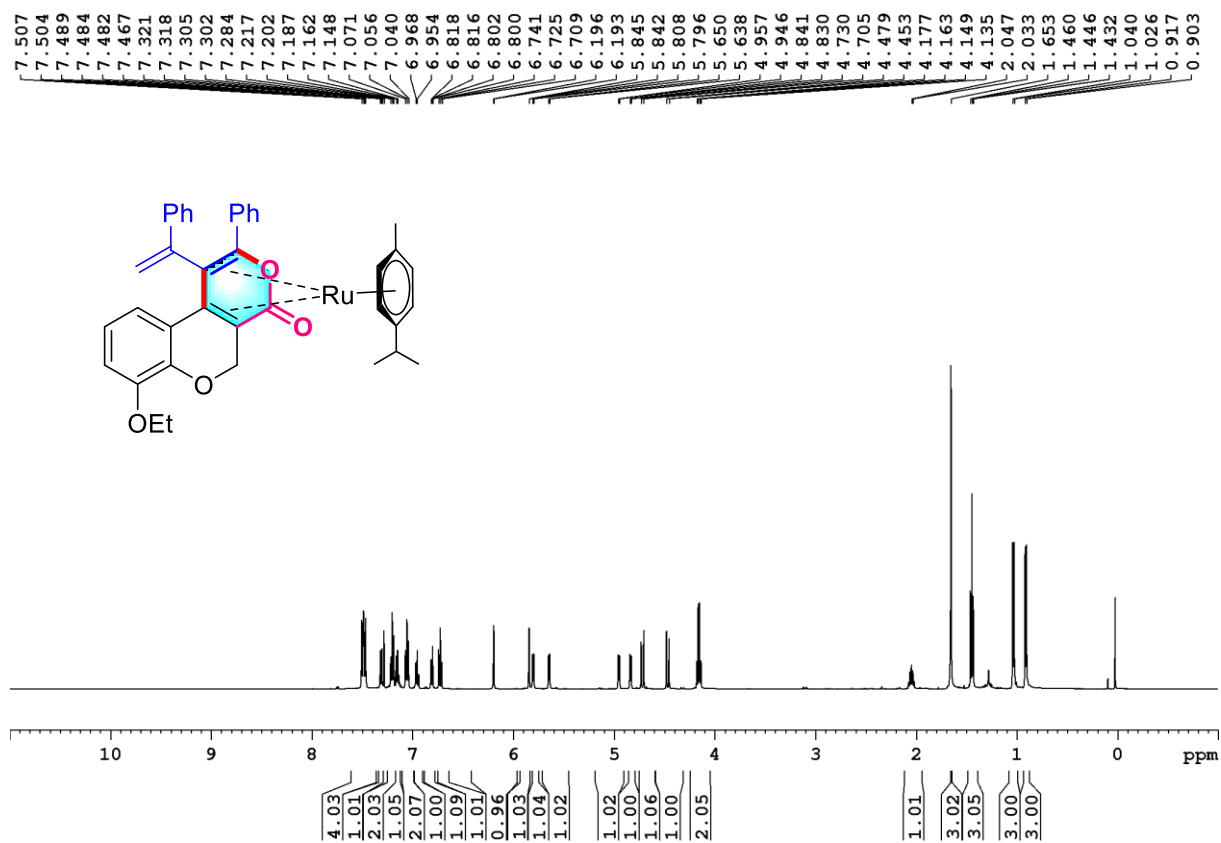

Figure S64.  $^1\text{H}$  NMR spectrum of compound **6ba**

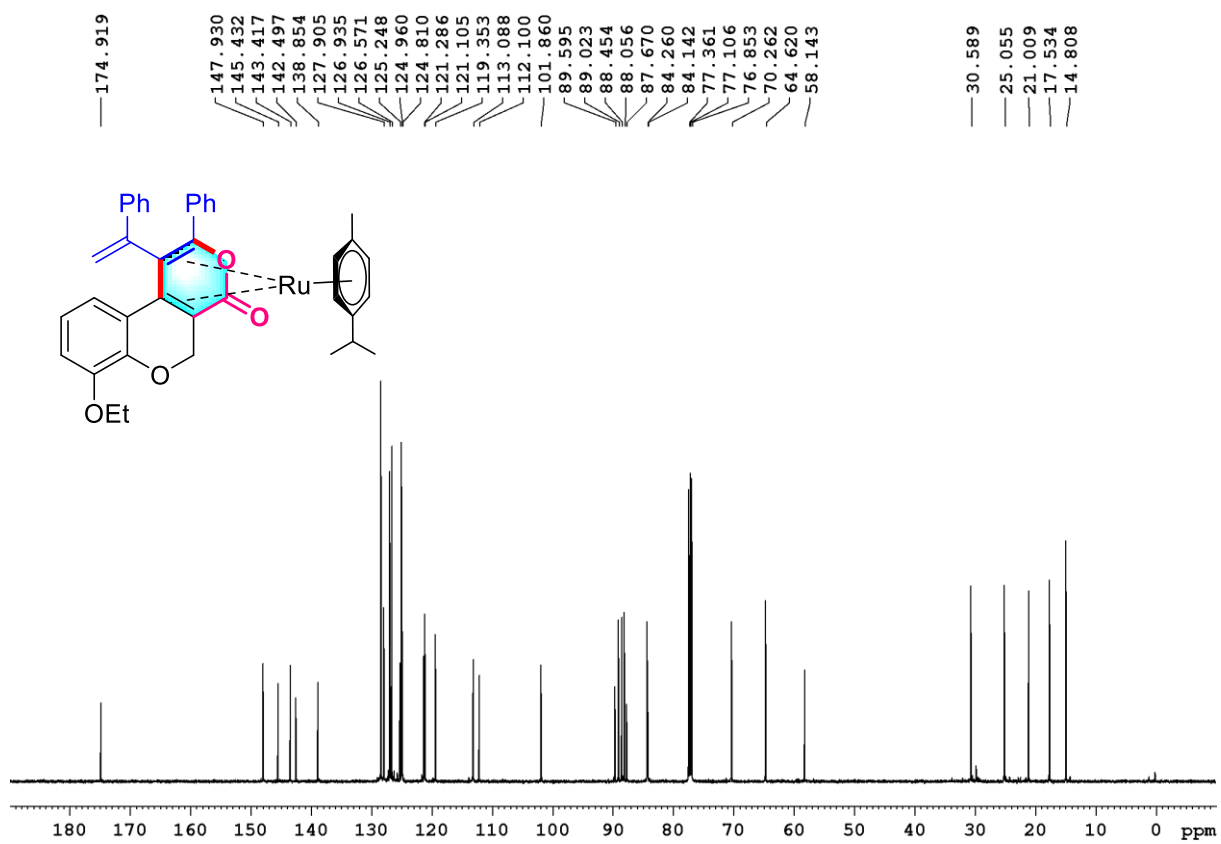

Figure S65.  $^{13}\text{C}\{^1\text{H}\}$  NMR spectrum of compound **6ba**

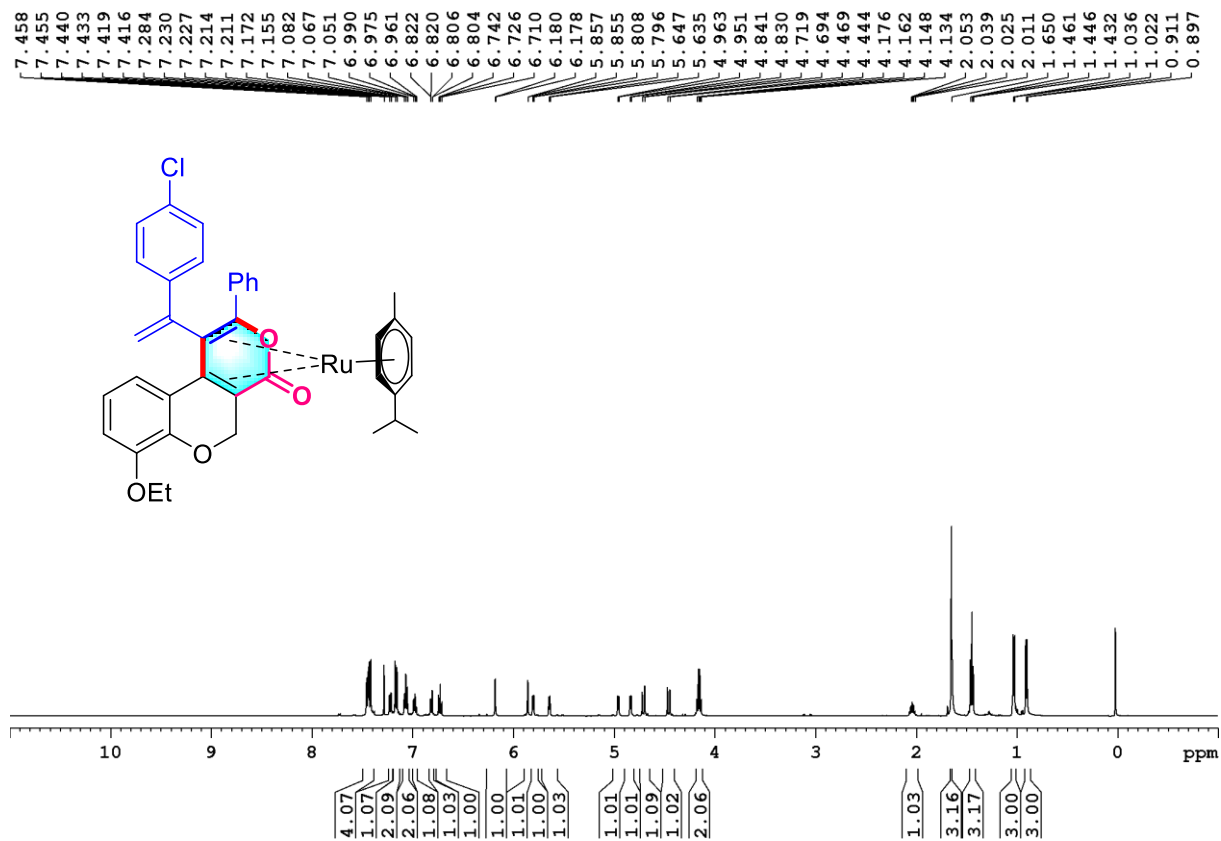

Figure S66.  $^1\text{H}$  NMR spectrum of compound **6bb**

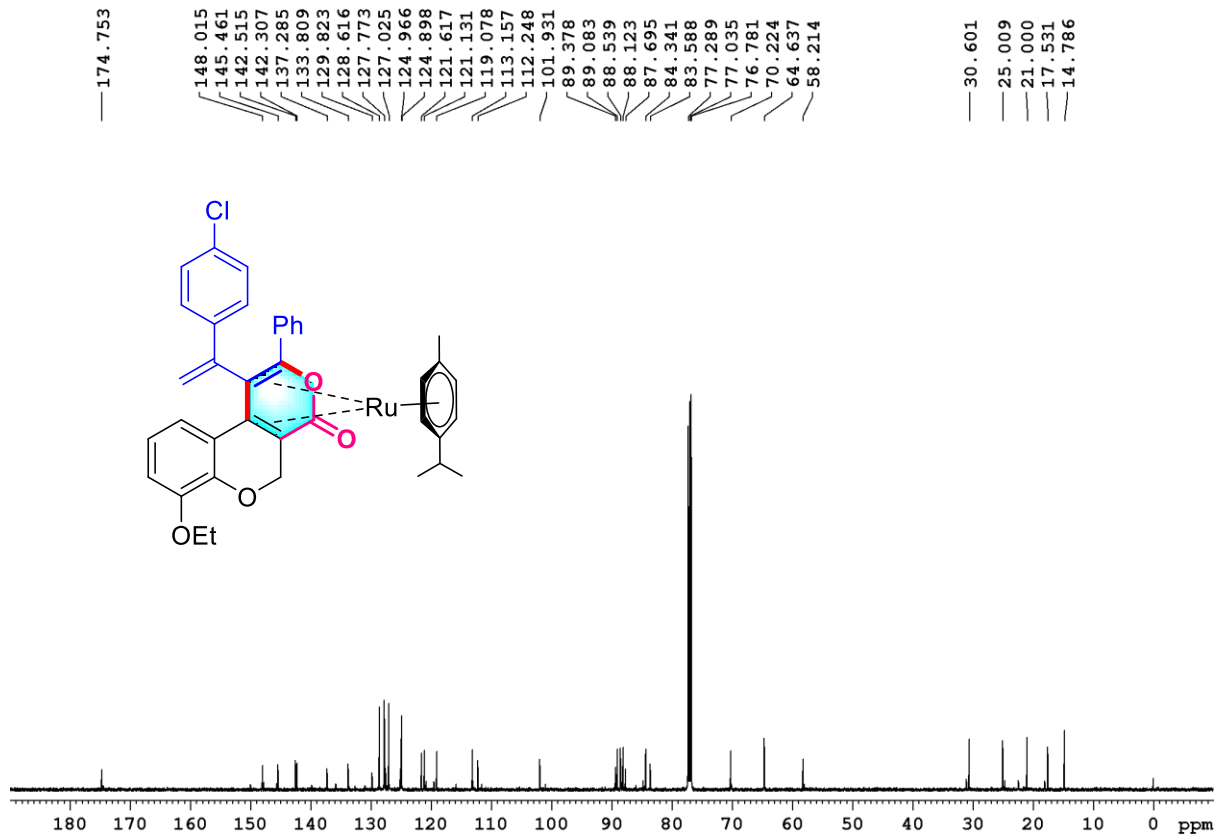

Figure S67.  $^{13}\text{C}\{^1\text{H}\}$  NMR spectrum of compound **6bb**

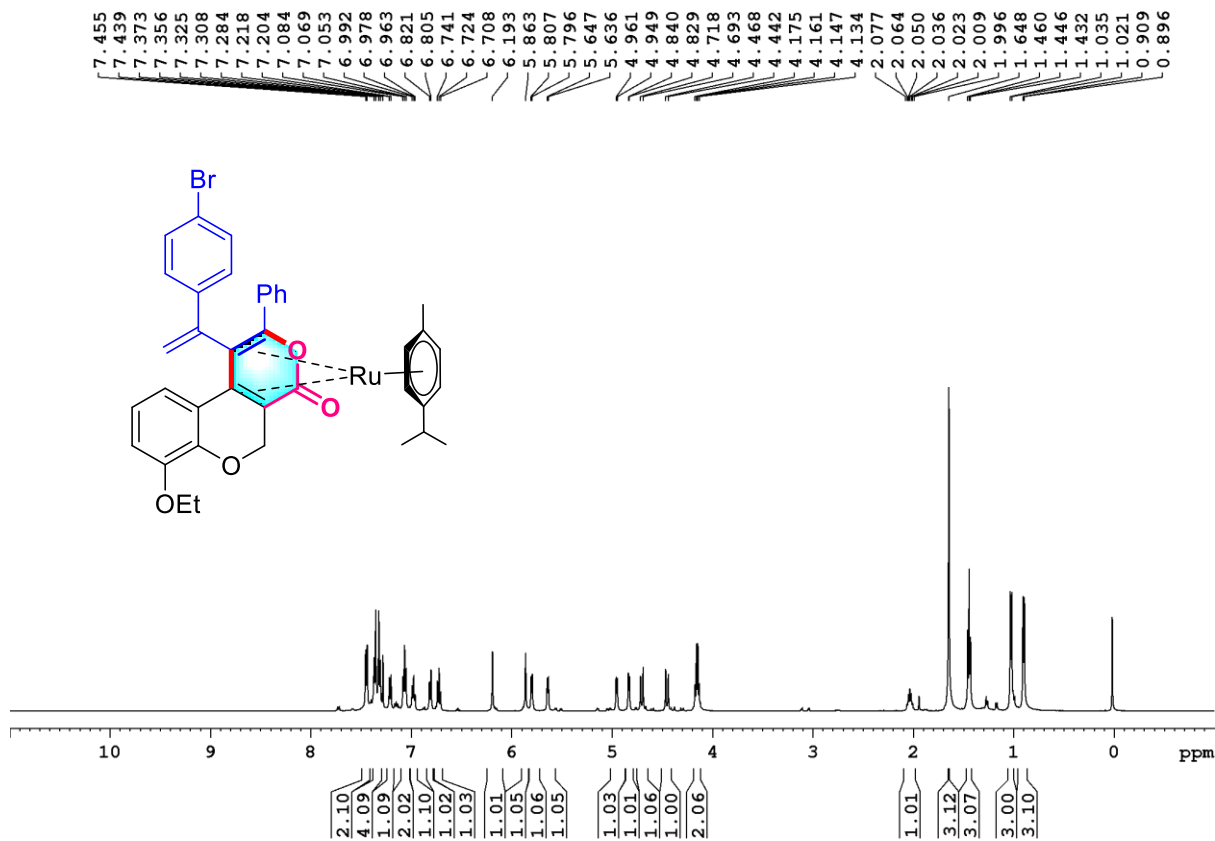

Figure S68.  $^1\text{H NMR}$  spectrum of compound **6bc**

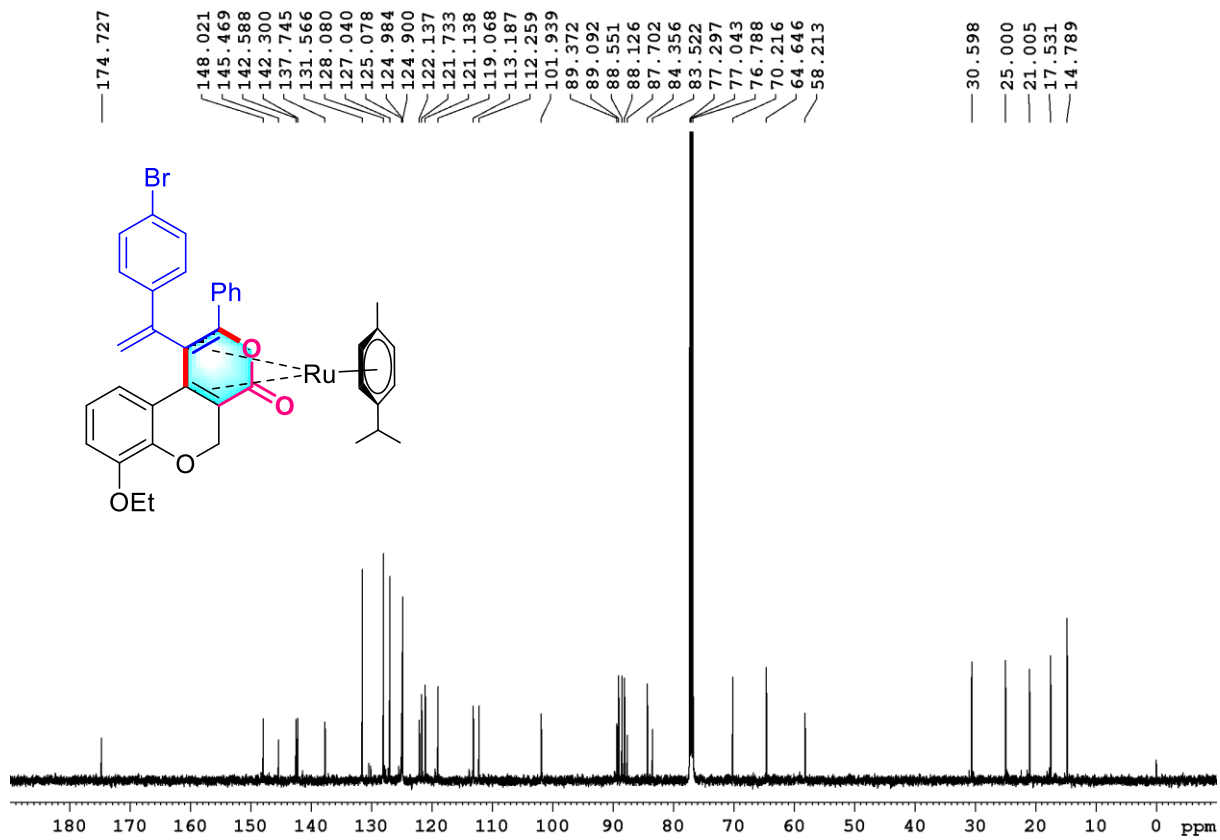

Figure S69.  $^{13}\text{C}\{^1\text{H}\}$  NMR spectrum of compound **6bc**

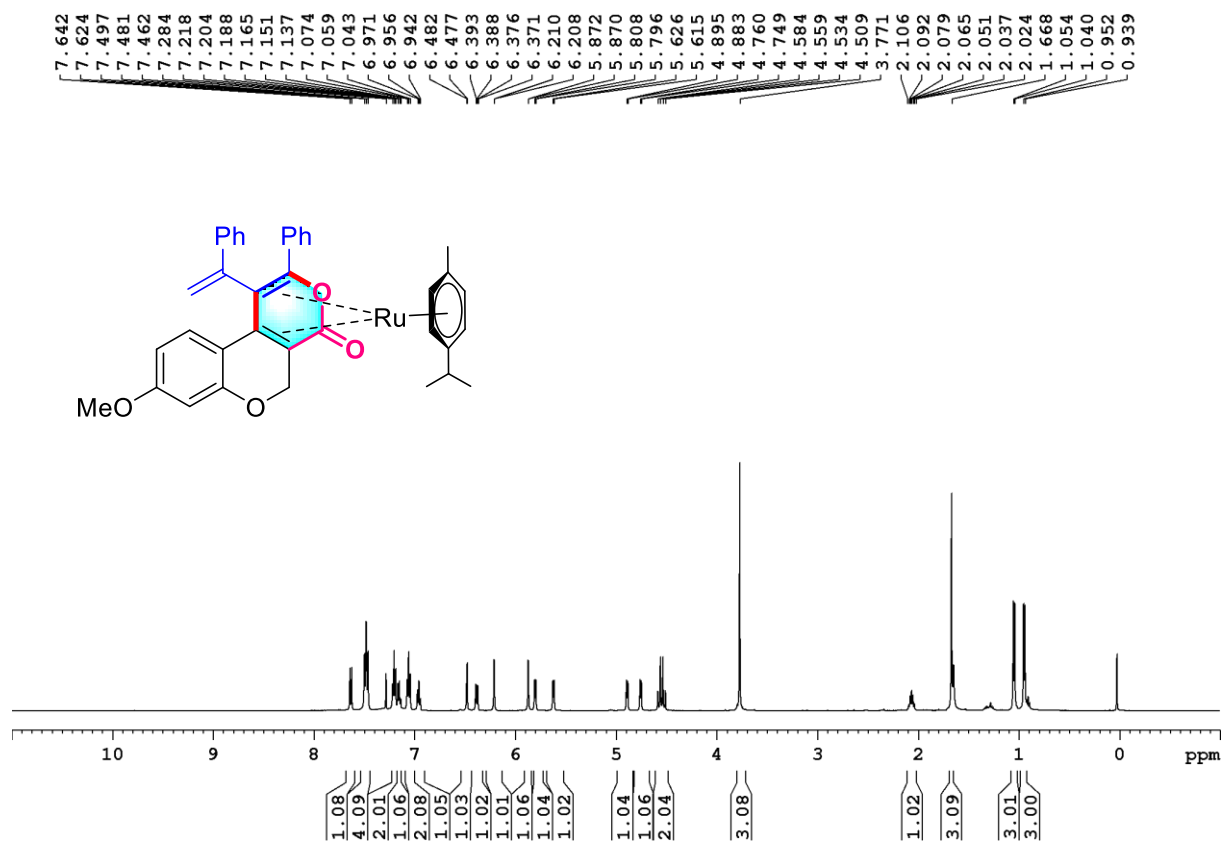

**Figure S70.**  $^1\text{H}$  NMR spectrum of compound 6da

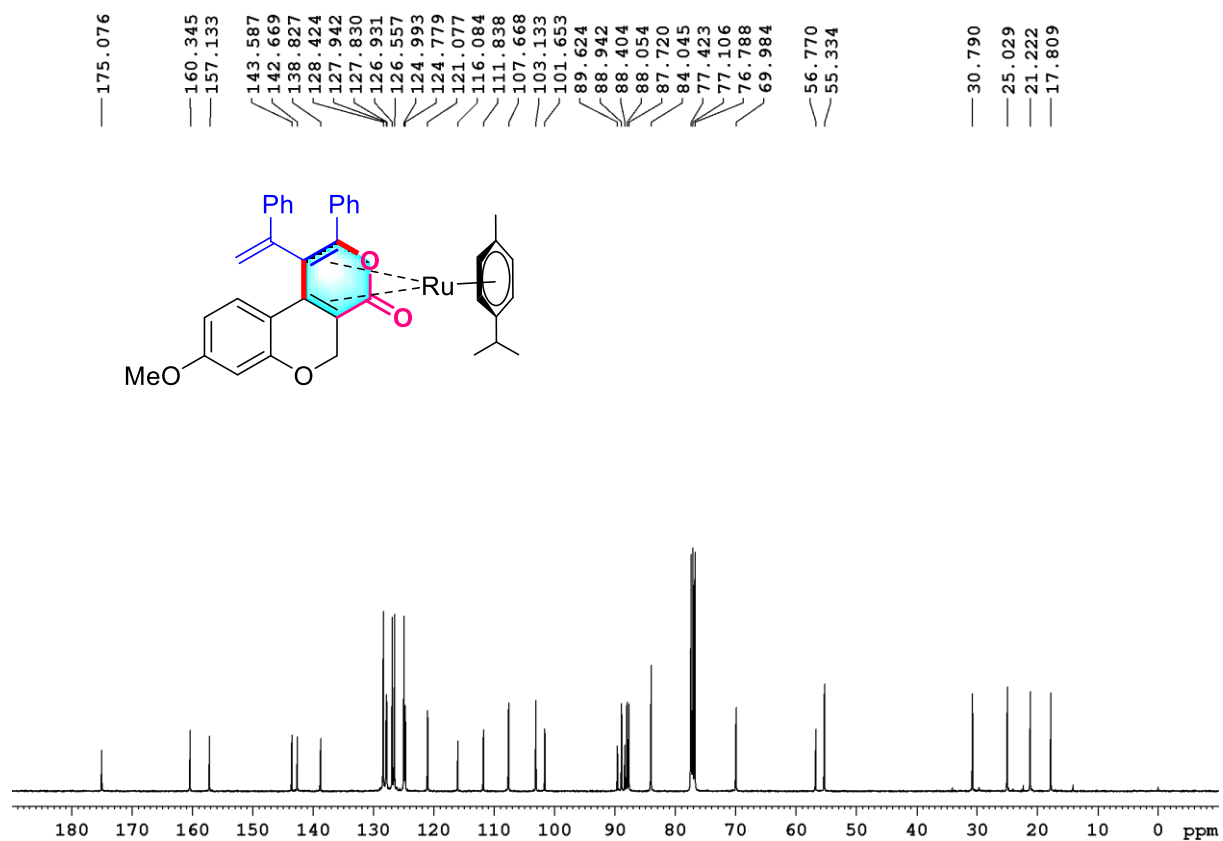

**Figure S71.**  $^{13}\text{C}\{^1\text{H}\}$  NMR spectrum of compound 6da

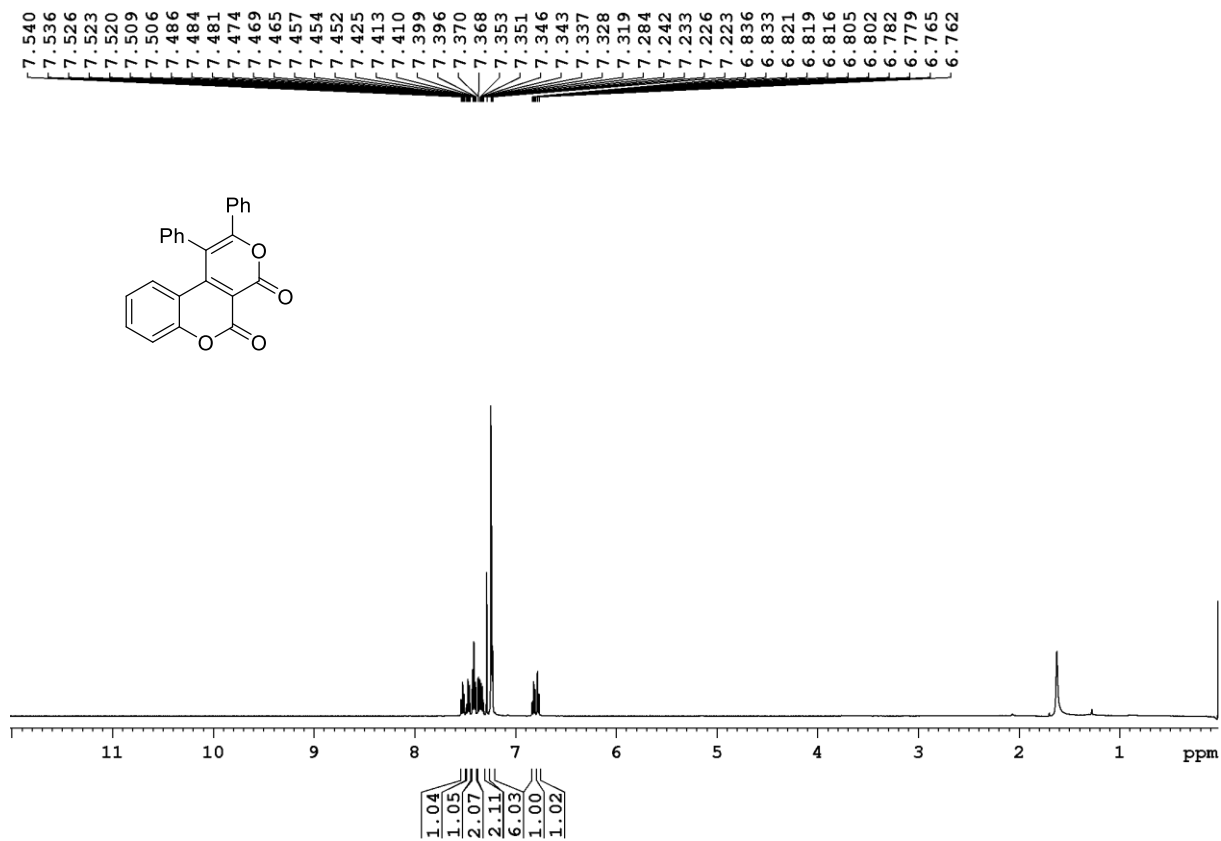

Figure S72. <sup>1</sup>H NMR spectrum of compound 7aa

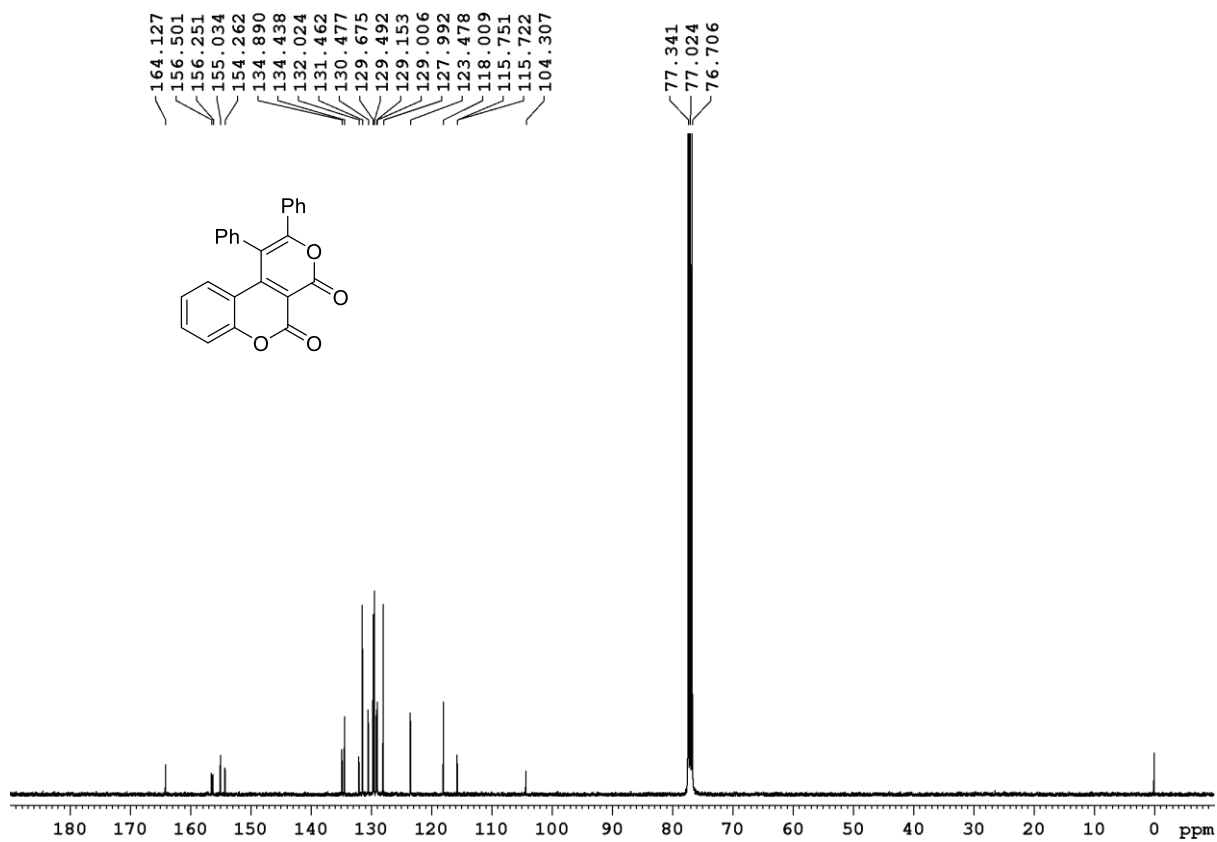

Figure S73. <sup>13</sup>C{<sup>1</sup>H} NMR spectrum of compound 7aa

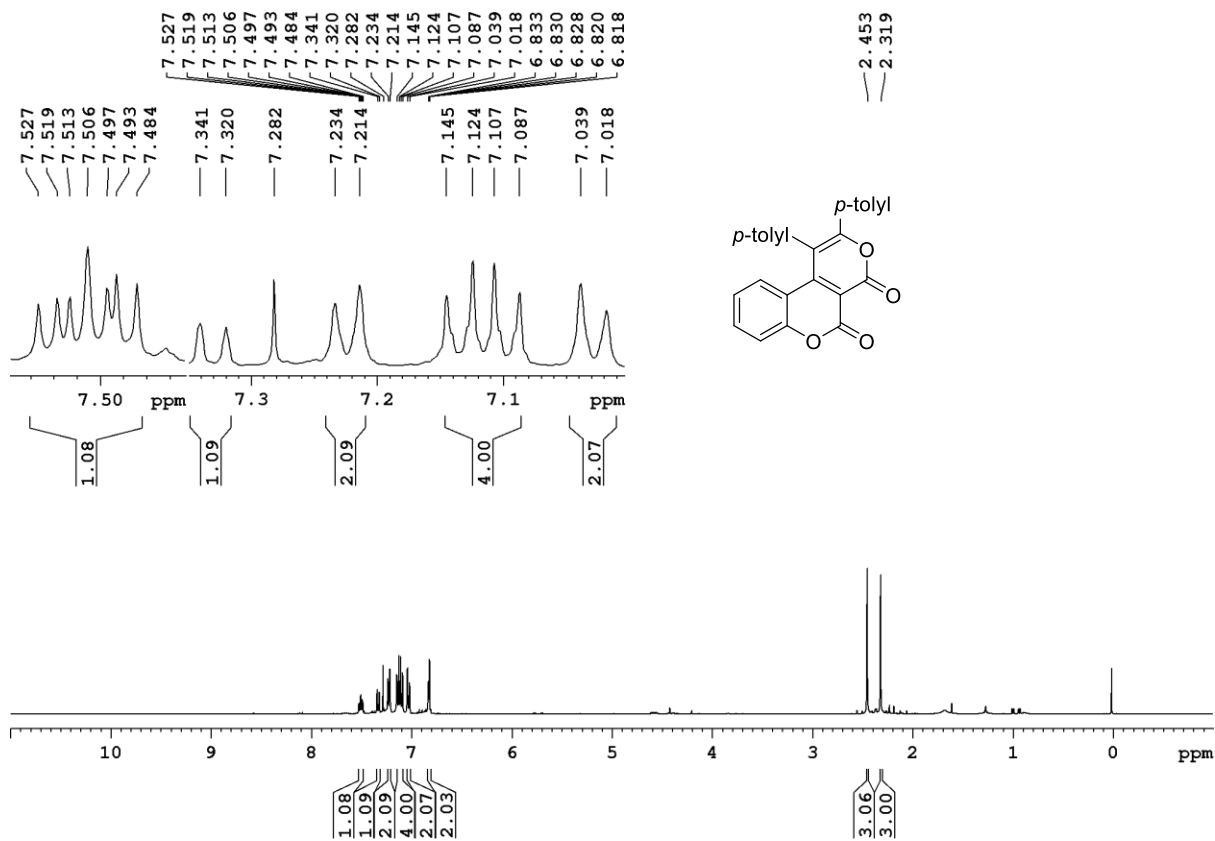

**Figure S74.** <sup>1</sup>H NMR spectrum of compound **7ab**

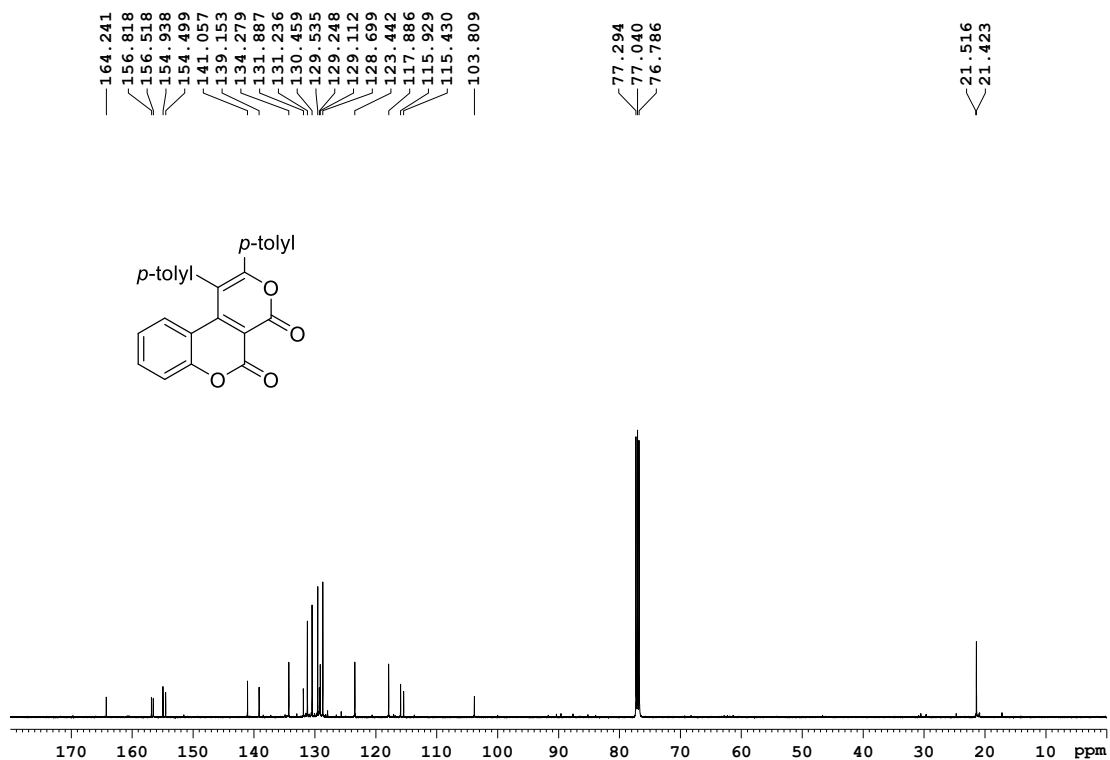

**Figure S75.** <sup>13</sup>C{<sup>1</sup>H} NMR spectrum of compound **7ab**

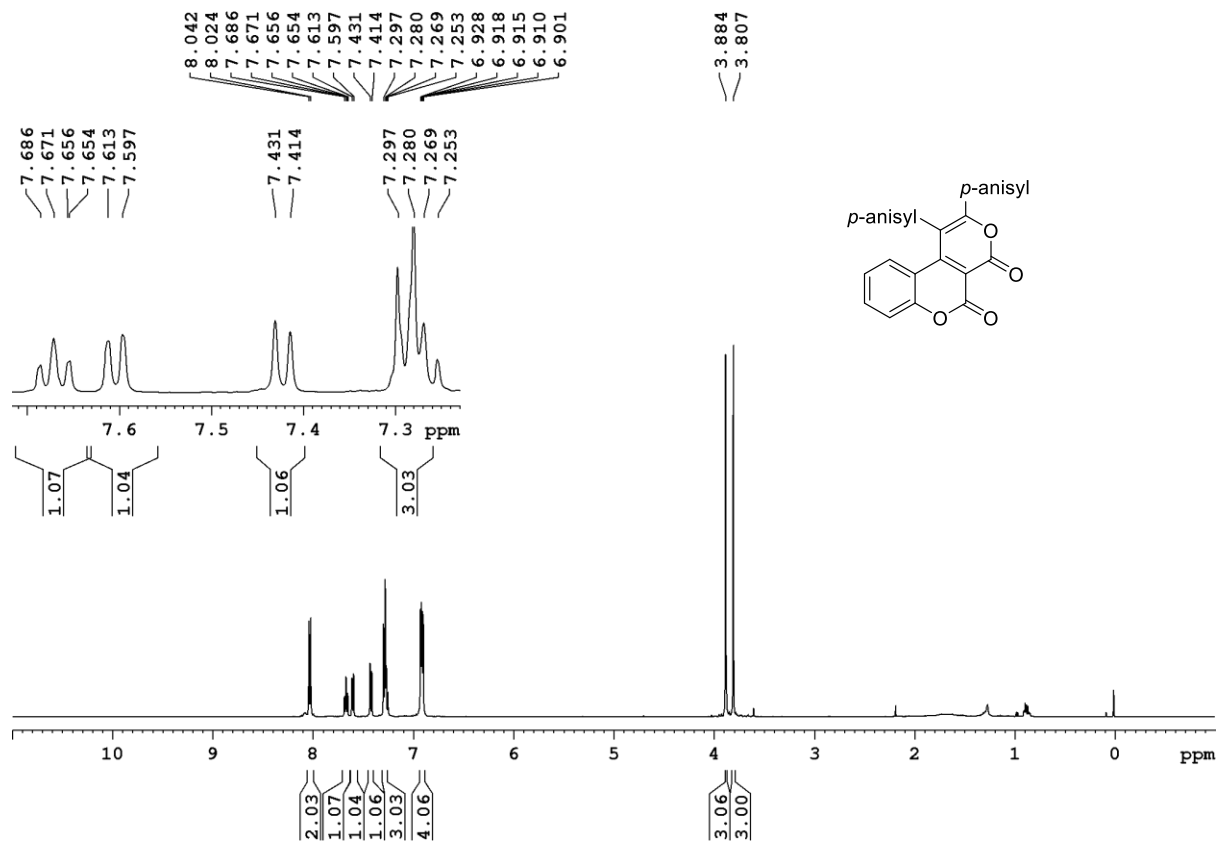

**Figure S76.**  $^1\text{H}$  NMR spectrum of compound **7ac**

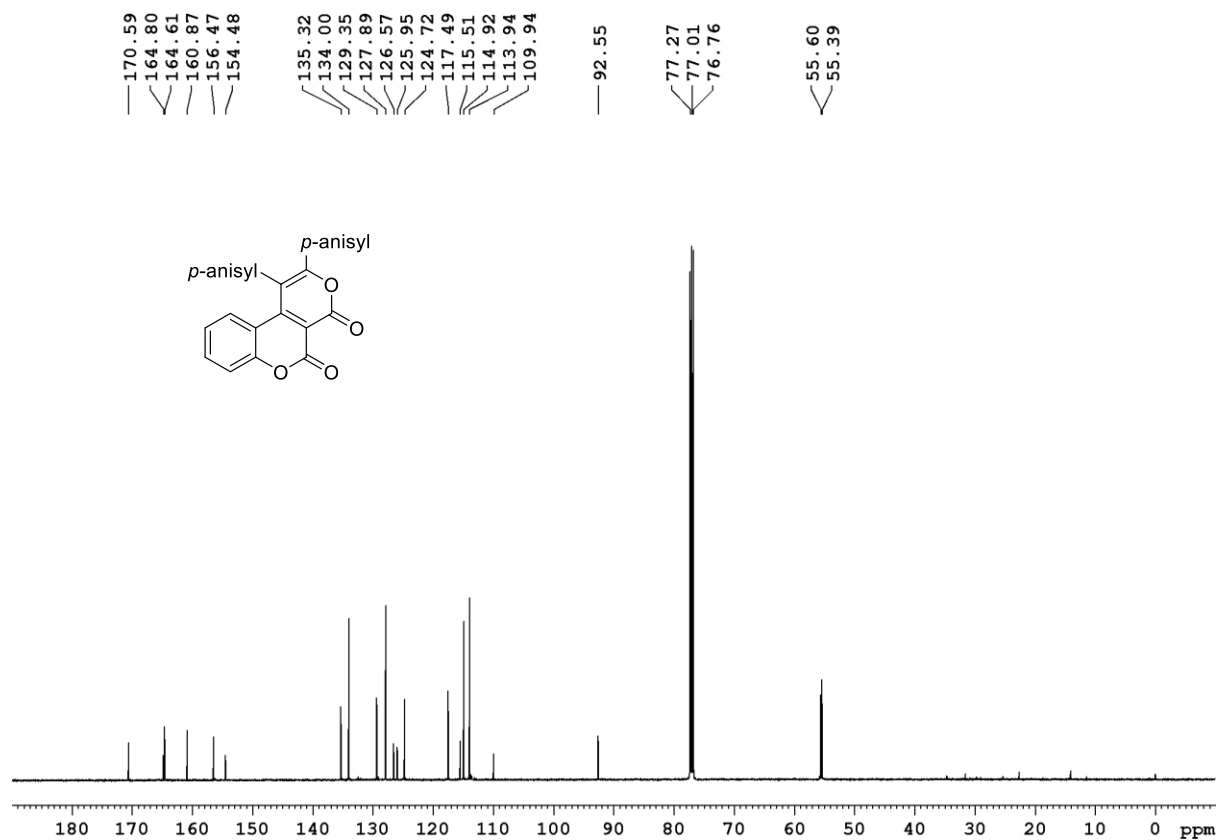

**Figure S77.**  $^{13}\text{C}\{^1\text{H}\}$  NMR spectrum of compound **7ac**



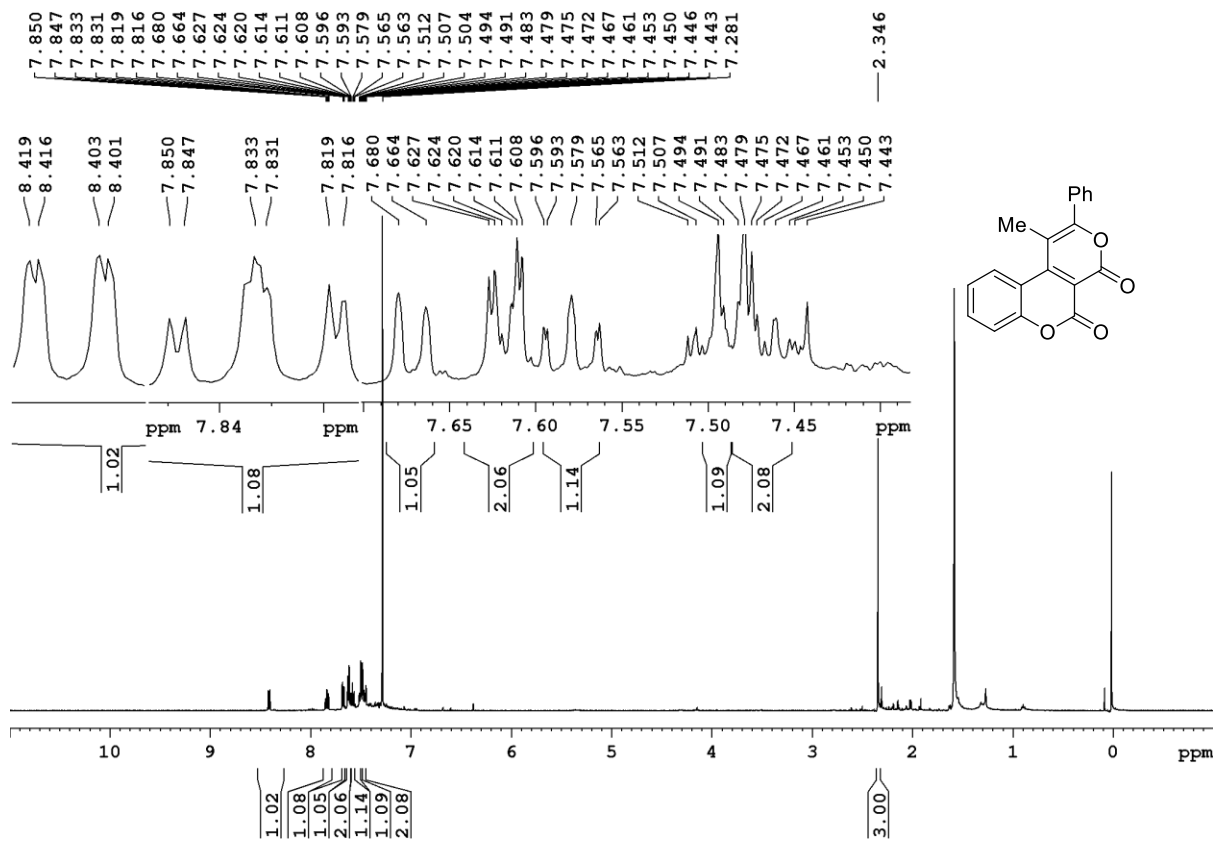

Figure S78. <sup>1</sup>H NMR spectrum of compound 7ae

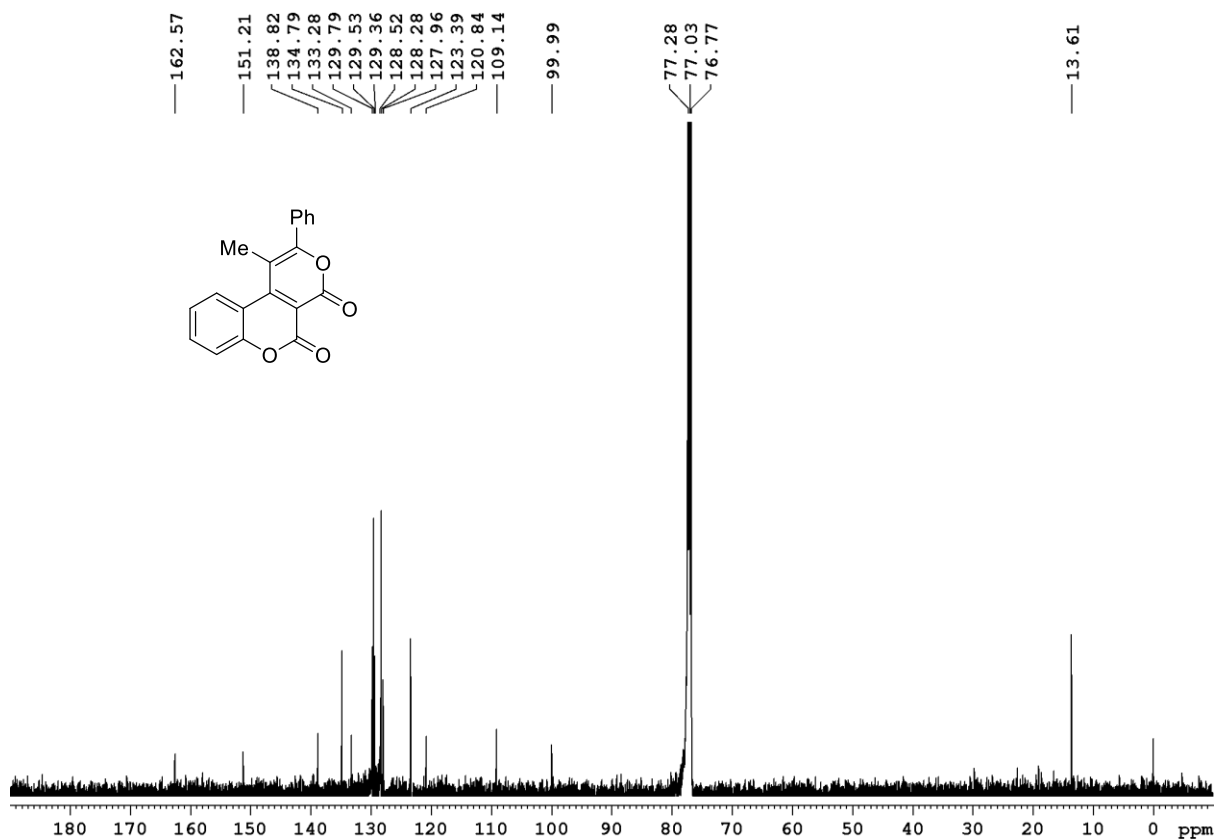

Figure S79. <sup>13</sup>C{<sup>1</sup>H} NMR spectrum of compound 7ae

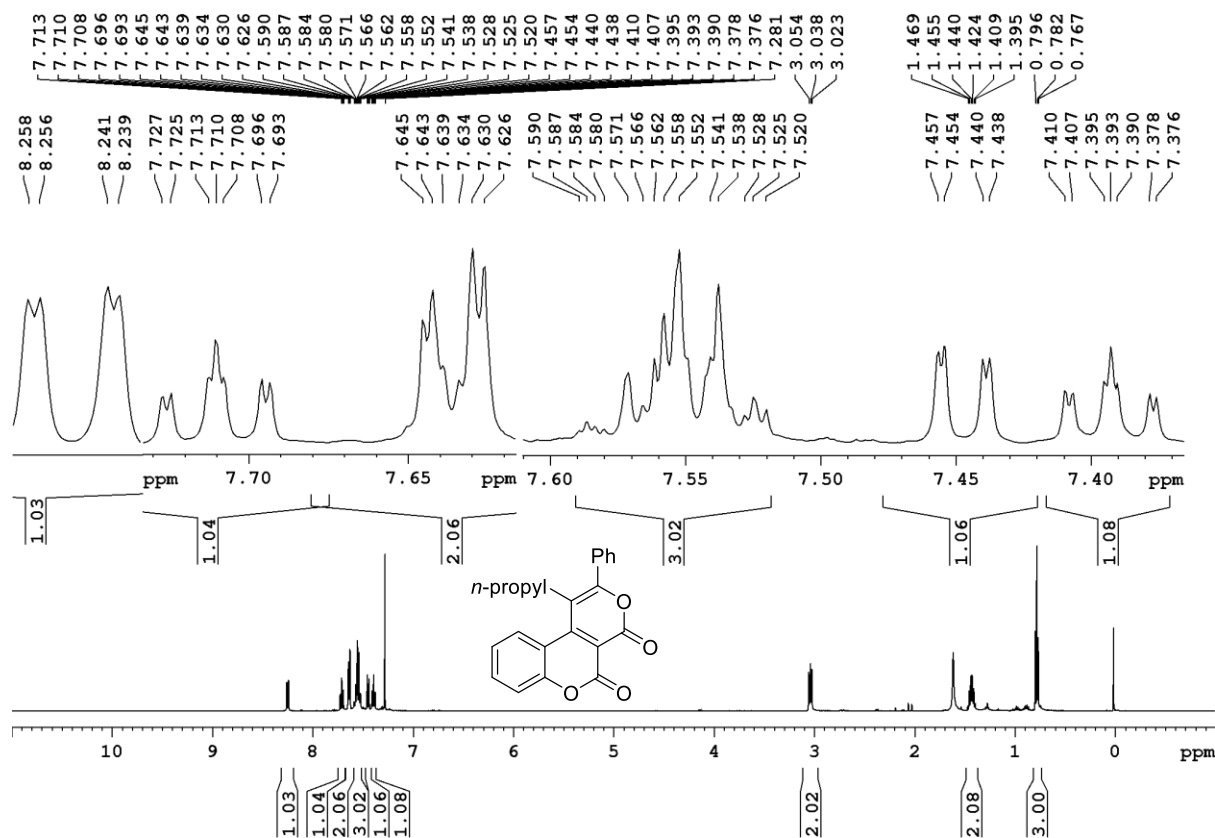

**Figure S80.**  $^1\text{H}$  NMR spectrum of compound **7ag**

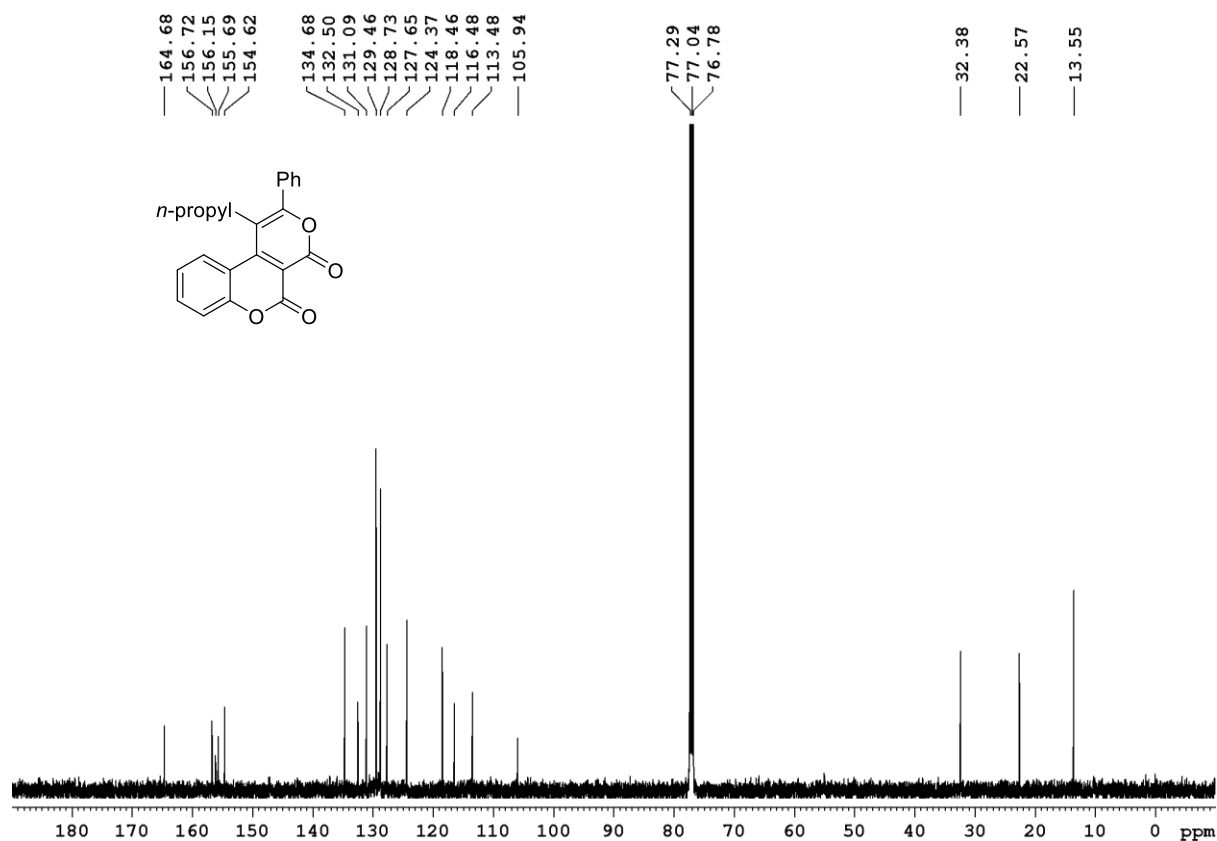

**Figure S81.**  $^{13}\text{C}\{^1\text{H}\}$  NMR spectrum of compound **7ag**

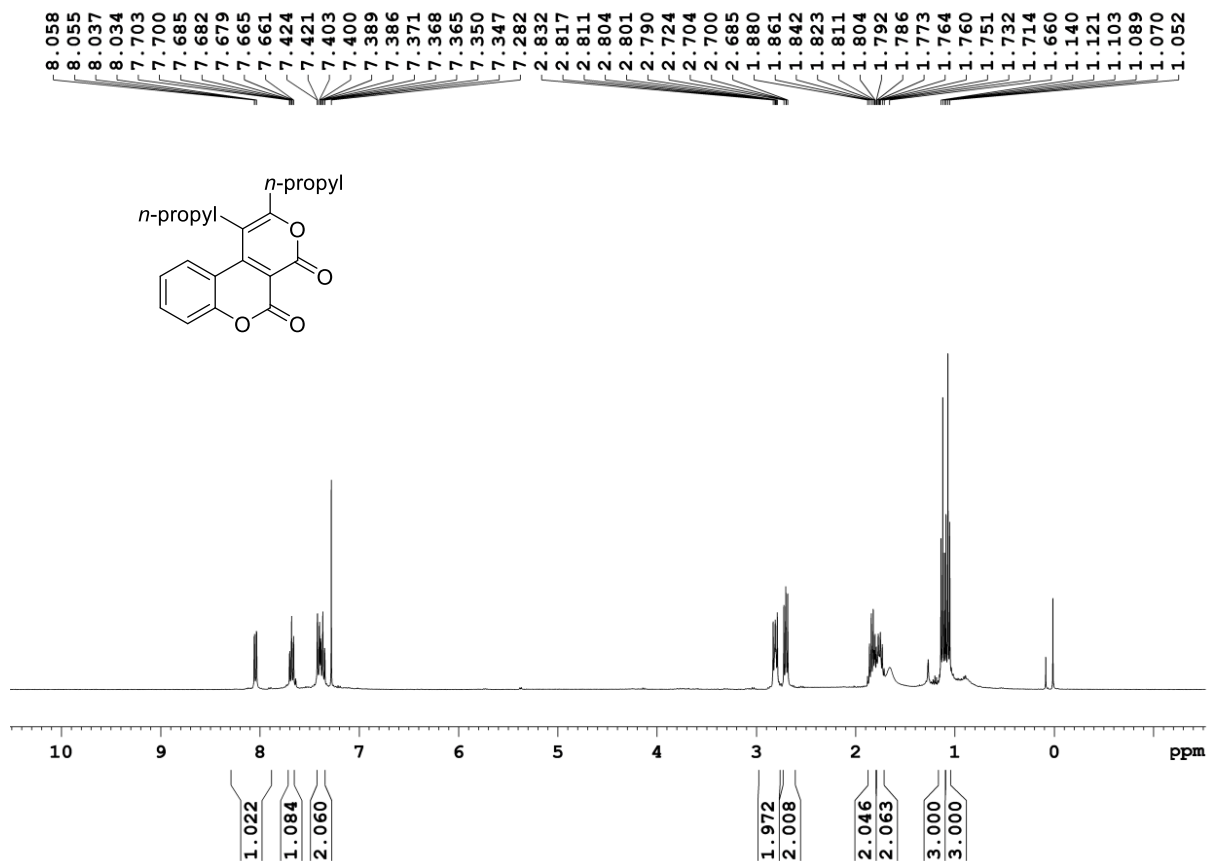

Figure S82. <sup>1</sup>H NMR spectrum of compound 7ai

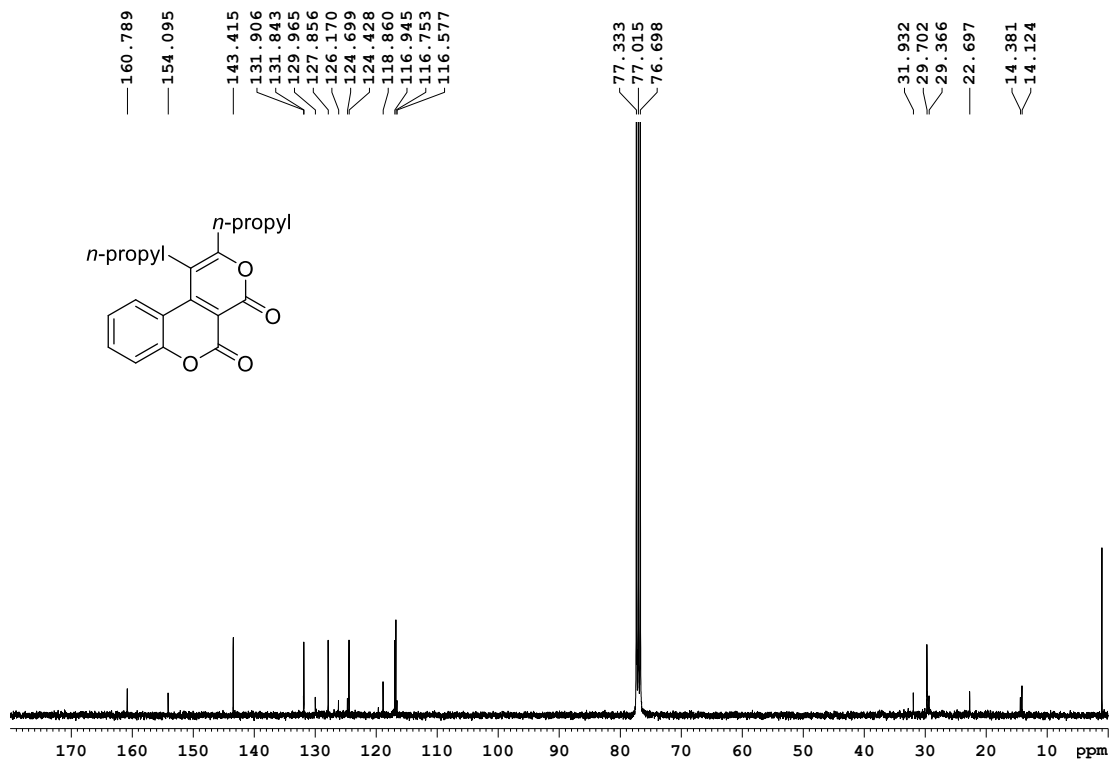

Figure S83. <sup>13</sup>C{<sup>1</sup>H} NMR spectrum of compound 7ai

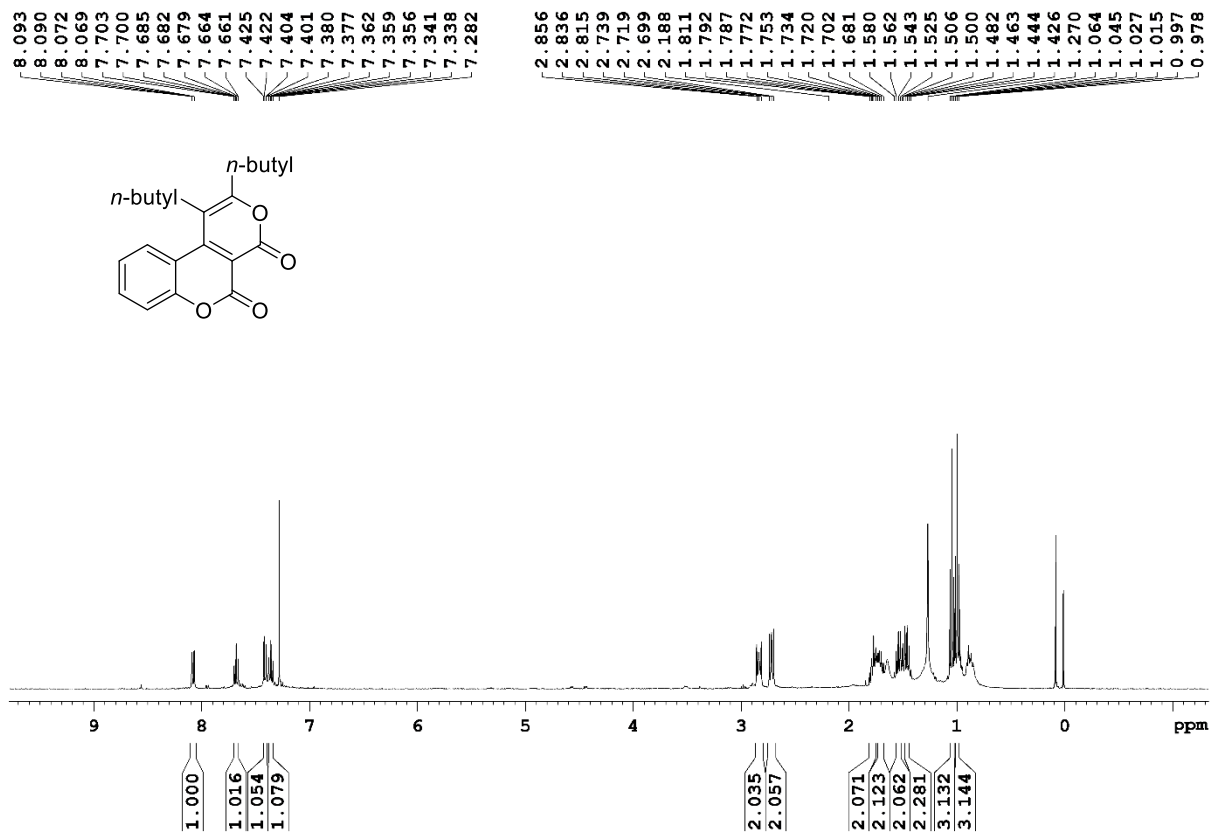

Figure S84. <sup>1</sup>H NMR spectrum of compound **7aj**

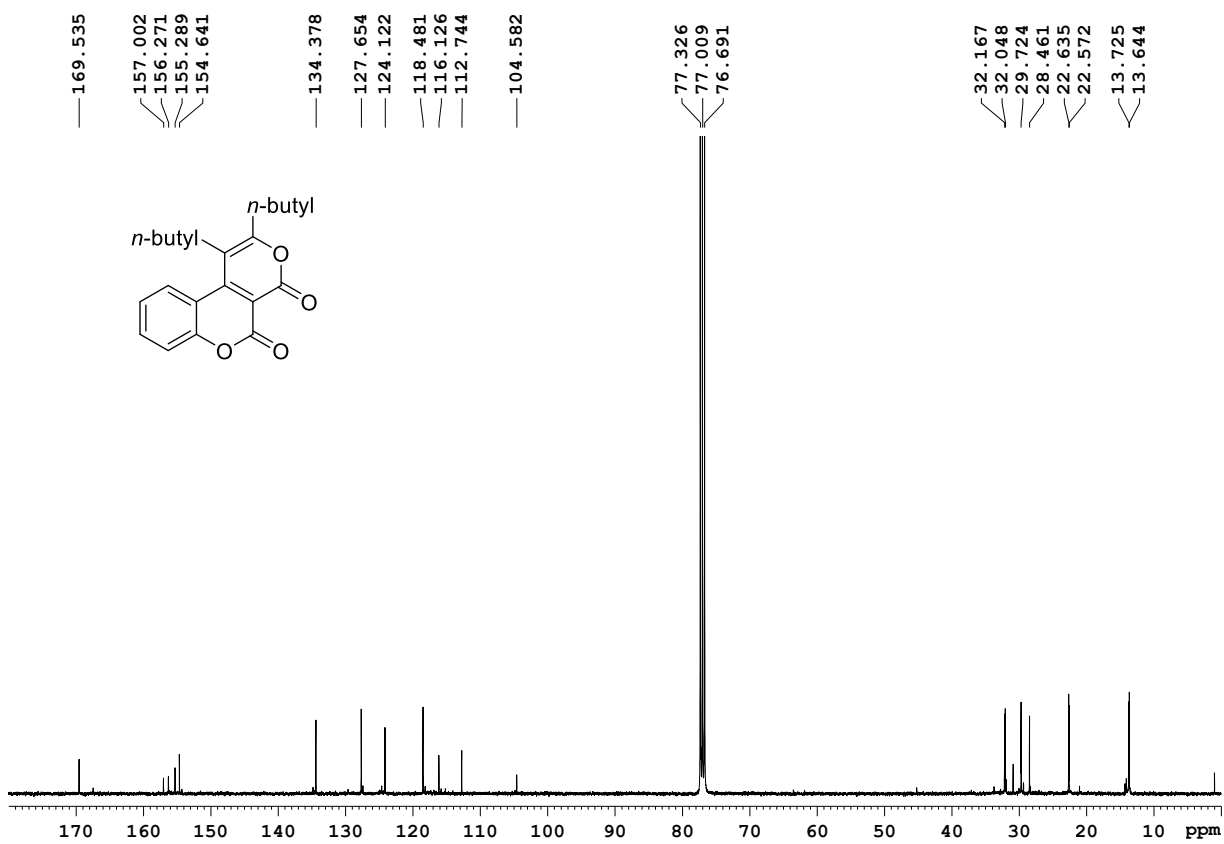

Figure S85. <sup>13</sup>C{<sup>1</sup>H} NMR spectrum of compound **7aj**

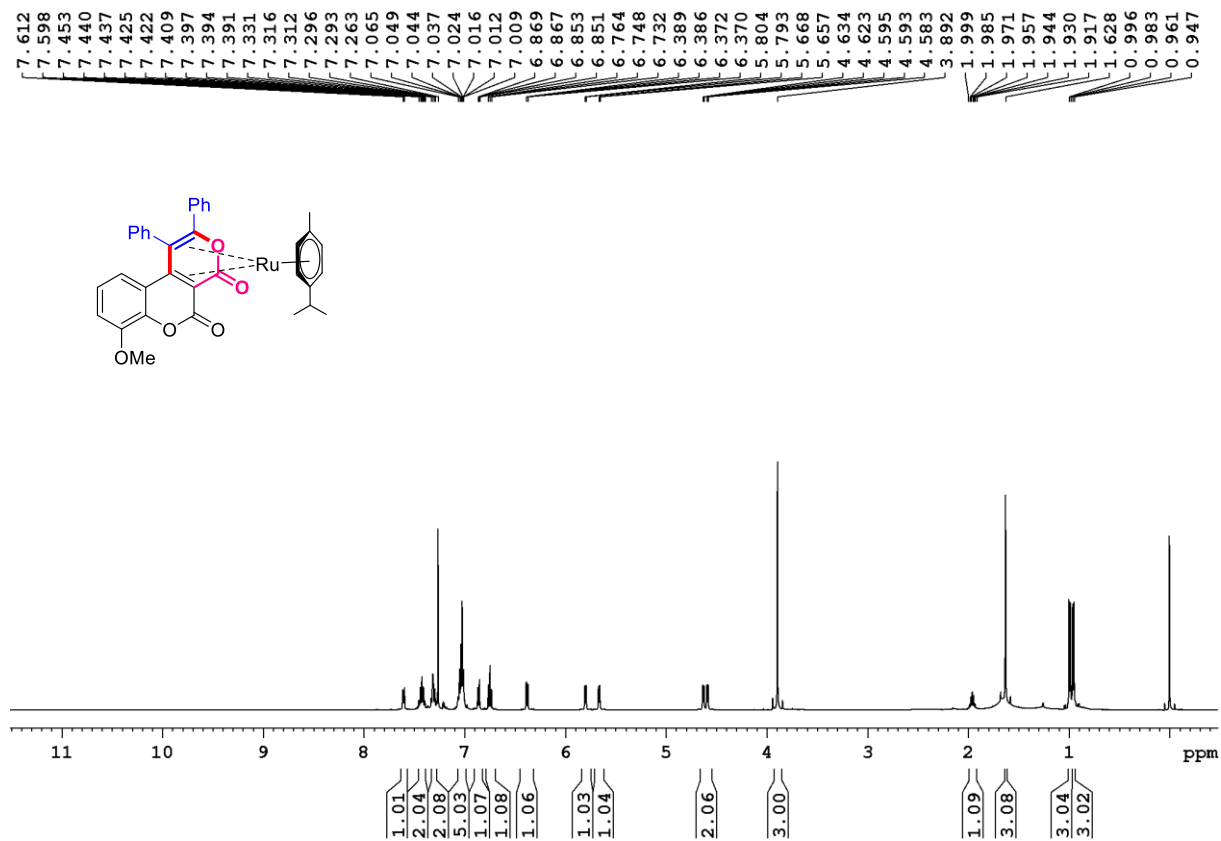

Figure S86.  $^1\text{H}$  NMR spectrum of compound 7'ba

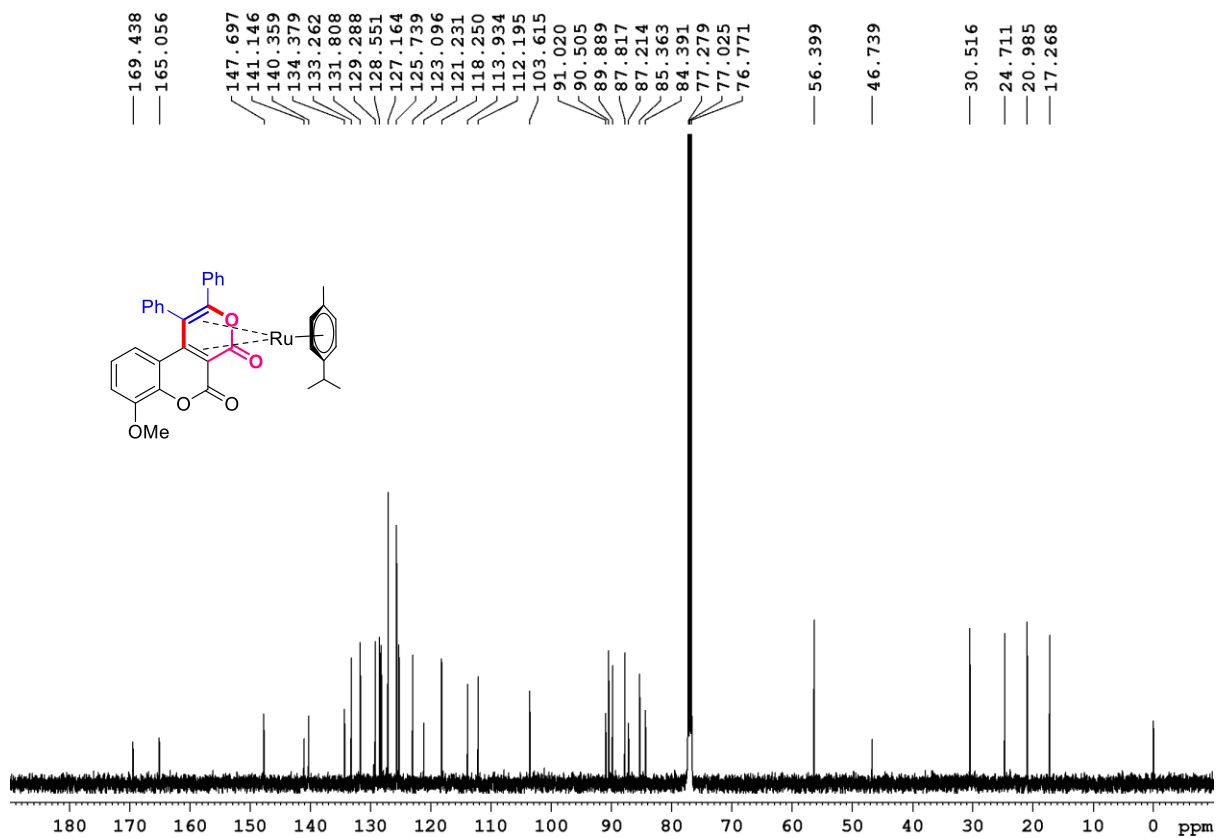

Figure S87.  $^{13}\text{C}\{^1\text{H}\}$  NMR spectrum of compound 7'ba

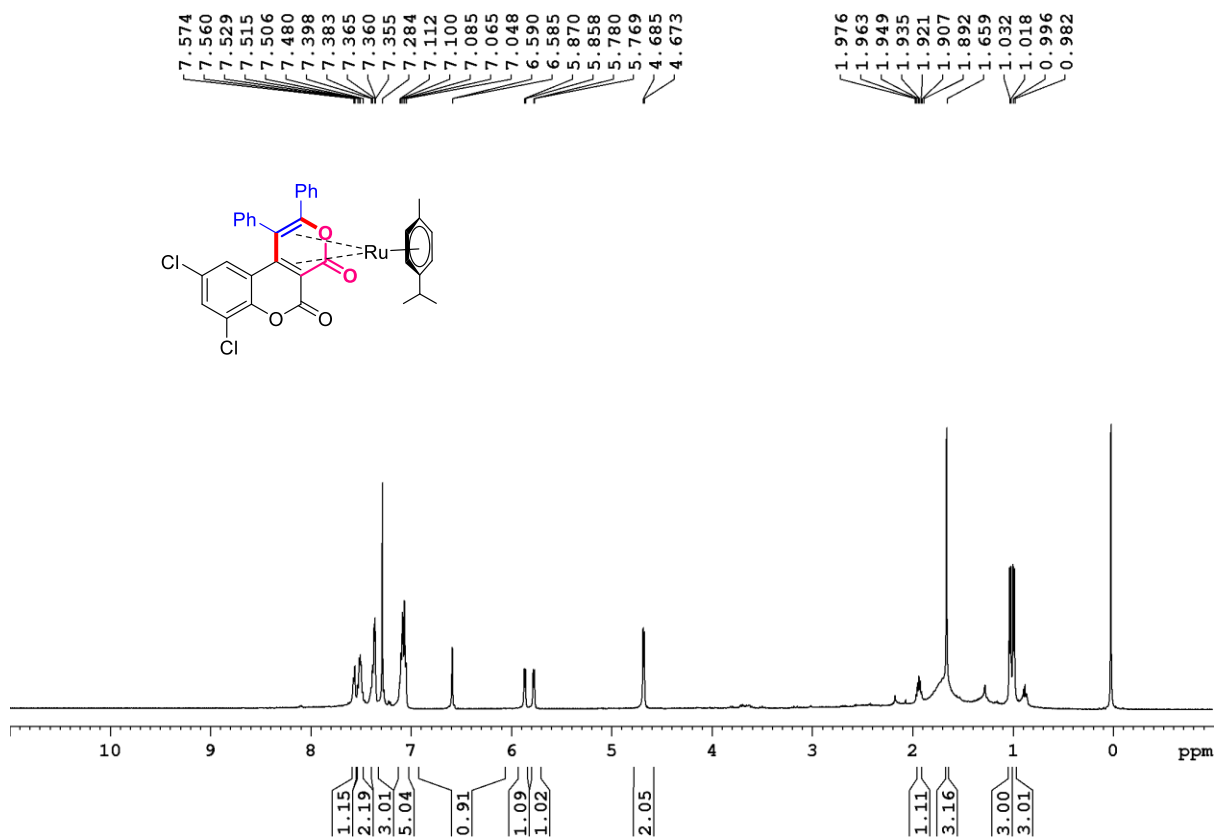

Figure S88.  $^1\text{H NMR}$  spectrum of compound 7'ca

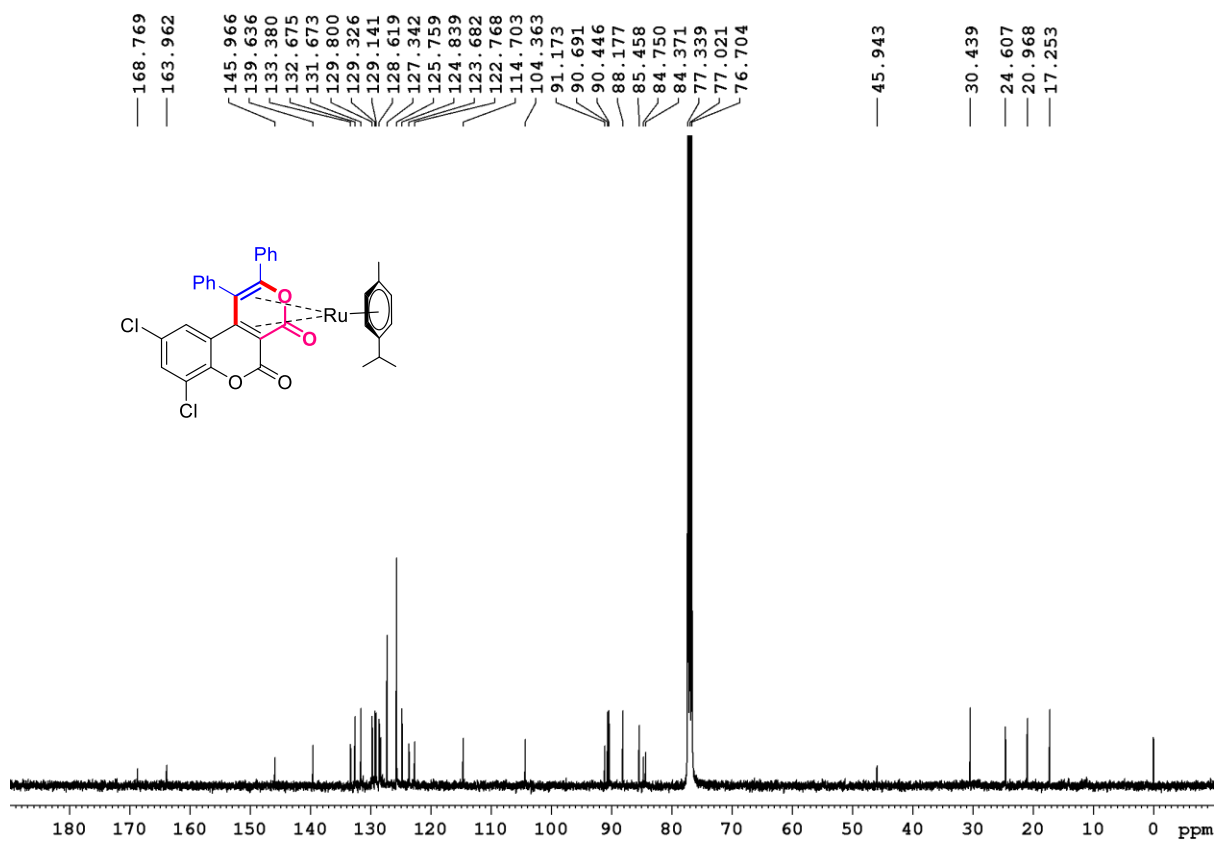

Figure S89.  $^{13}\text{C}\{^1\text{H}\}$  NMR spectrum of compound 7'ca

## REFERENCE

- (1) (a) Sheldrick, G. M. *SADABS, Siemens Area Detector Absorption Correction*, University of Gottingen, Germany, **1996**. (b) Sheldrick, G. M. *SHELX-97-A program for crystal structure solution and refinement*, University of Gottingen, **1997**. (c) Sheldrick, G. M. *SHELXTL NT Crystal Structure Analysis Package*, Bruker AXS, Analytical X-ray System, WI, USA, **1999**, version 5.10].
